# Supplementary material for: Novel microsimulation model of tobacco use behaviours and outcomes: calibration and validation in a US population
Source: PubMed Central journal article supplement — BMJ Open. 2020 May 12;10(5):e032579. doi: 10.1136/bmjopen-2019-032579 (PMC7228509; doi:10.1136/bmjopen-2019-032579), 2020-05-12
Supplement: bmjopen-2019-032579.draft_revisions.pdf [file bmjopen-2019-032579.draft_revisions.pdf]

# BMJ Open

BMJ Open is committed to open peer review. As part of this commitment we make the peer review history of every article we publish publicly available.

When an article is published we post the peer reviewers' comments and the authors' responses online. We also post the versions of the paper that were used during peer review. These are the versions that the peer review comments apply to.

The versions of the paper that follow are the versions that were submitted during the peer review process. They are not the versions of record or the final published versions. They should not be cited or distributed as the published version of this manuscript.

BMJ Open is an open access journal and the full, final, typeset and author-corrected version of record of the manuscript is available on our site with no access controls, subscription charges or pay-per-view fees (<http://bmjopen.bmj.com>).

If you have any questions on BMJ Open's open peer review process please email [info.bmjopen@bmj.com](mailto:info.bmjopen@bmj.com)

# BMJ Open

## A novel microsimulation model of tobacco use behaviors and outcomes

|                               |                                                                                                                                                                                                                                                                                                                                                                                                                                                                                                                                                                                                                                                                                                                                                                                                                                                                                                                                                                                                                                                                                                                                     |
|-------------------------------|-------------------------------------------------------------------------------------------------------------------------------------------------------------------------------------------------------------------------------------------------------------------------------------------------------------------------------------------------------------------------------------------------------------------------------------------------------------------------------------------------------------------------------------------------------------------------------------------------------------------------------------------------------------------------------------------------------------------------------------------------------------------------------------------------------------------------------------------------------------------------------------------------------------------------------------------------------------------------------------------------------------------------------------------------------------------------------------------------------------------------------------|
| Journal:                      | <i>BMJ Open</i>                                                                                                                                                                                                                                                                                                                                                                                                                                                                                                                                                                                                                                                                                                                                                                                                                                                                                                                                                                                                                                                                                                                     |
| Manuscript ID                 | bmjopen-2019-032579                                                                                                                                                                                                                                                                                                                                                                                                                                                                                                                                                                                                                                                                                                                                                                                                                                                                                                                                                                                                                                                                                                                 |
| Article Type:                 | Research                                                                                                                                                                                                                                                                                                                                                                                                                                                                                                                                                                                                                                                                                                                                                                                                                                                                                                                                                                                                                                                                                                                            |
| Date Submitted by the Author: | 25-Jun-2019                                                                                                                                                                                                                                                                                                                                                                                                                                                                                                                                                                                                                                                                                                                                                                                                                                                                                                                                                                                                                                                                                                                         |
| Complete List of Authors:     | Reddy, Krishna; Massachusetts General Hospital, Medical Practice Evaluation Center<br>Bulteel, Alexander; Massachusetts General Hospital, Medical Practice Evaluation Center<br>Levy, Douglas; Massachusetts General Hospital<br>Torola, Pamela; Massachusetts General Hospital, Medical Practice Evaluation Center<br>Hyle, Emily; Massachusetts General Hospital, Medical Practice Evaluation Center<br>Hou, Taige; Massachusetts General Hospital, Medical Practice Evaluation Center<br>Osher, Benjamin; Massachusetts General Hospital, Medical Practice Evaluation Center<br>Yu, Liyang; Massachusetts General Hospital, Medical Practice Evaluation Center<br>Shebl, Fatma; Massachusetts General Hospital, Medical Practice Evaluation Center<br>Paltiel, A David; Yale University School of Public Health<br>Freedberg, Kenneth; Massachusetts General Hospital, Medical Practice Evaluation Center<br>Weinstein, Milton ; Harvard University T H Chan School of Public Health<br>Rigotti, Nancy; Massachusetts General Hospital<br>Walensky, Rochelle; Massachusetts General Hospital, Medical Practice Evaluation Center |
| Keywords:                     | tobacco, nicotine, model, validation, calibration, relapse                                                                                                                                                                                                                                                                                                                                                                                                                                                                                                                                                                                                                                                                                                                                                                                                                                                                                                                                                                                                                                                                          |
|                               |                                                                                                                                                                                                                                                                                                                                                                                                                                                                                                                                                                                                                                                                                                                                                                                                                                                                                                                                                                                                                                                                                                                                     |

SCHOLARONE™  
Manuscripts

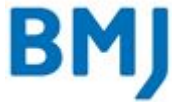

I, the Submitting Author has the right to grant and does grant on behalf of all authors of the Work (as defined in the below author licence), an exclusive licence and/or a non-exclusive licence for contributions from authors who are: i) UK Crown employees; ii) where BMJ has agreed a CC-BY licence shall apply, and/or iii) in accordance with the terms applicable for US Federal Government officers or employees acting as part of their official duties; on a worldwide, perpetual, irrevocable, royalty-free basis to BMJ Publishing Group Ltd ("BMJ") its licensees and where the relevant Journal is co-owned by BMJ to the co-owners of the Journal, to publish the Work in this journal and any other BMJ products and to exploit all rights, as set out in our [licence](#).

The Submitting Author accepts and understands that any supply made under these terms is made by BMJ to the Submitting Author unless you are acting as an employee on behalf of your employer or a postgraduate student of an affiliated institution which is paying any applicable article publishing charge ("APC") for Open Access articles. Where the Submitting Author wishes to make the Work available on an Open Access basis (and intends to pay the relevant APC), the terms of reuse of such Open Access shall be governed by a Creative Commons licence – details of these licences and which [Creative Commons](#) licence will apply to this Work are set out in our licence referred to above.

Other than as permitted in any relevant BMJ Author's Self Archiving Policies, I confirm this Work has not been accepted for publication elsewhere, is not being considered for publication elsewhere and does not duplicate material already published. I confirm all authors consent to publication of this Work and authorise the granting of this licence.

## A novel microsimulation model of tobacco use behaviors and outcomes

Krishna P. Reddy<sup>1,2,3,7,\*</sup>, Alexander J.B. Bulteel<sup>1</sup>, Douglas E. Levy<sup>2,4,7</sup>, Pamela Torola<sup>1</sup>, Emily P. Hyle<sup>1,6,7</sup>,  
Taige Hou<sup>1</sup>, Benjamin Osher<sup>1</sup>, Liyang Yu<sup>1</sup>, Fatma M. Shebl<sup>1,7</sup>, A. David Paltiel<sup>8</sup>,  
Kenneth A. Freedberg<sup>1,5,6,7,9</sup>, Milton C. Weinstein<sup>7,9</sup>, Nancy A. Rigotti<sup>2,5,7</sup>, Rochelle P. Walensky<sup>1,5,6,7</sup>

<sup>1</sup>Medical Practice Evaluation Center, <sup>2</sup>Tobacco Research and Treatment Center, <sup>3</sup>Division of Pulmonary and Critical Care Medicine, <sup>4</sup>Mongan Institute Health Policy Research Center, <sup>5</sup>Division of General Internal Medicine, and <sup>6</sup>Division of Infectious Diseases, Massachusetts General Hospital, Boston, MA, USA

<sup>7</sup>Harvard Medical School, Boston, MA, USA

<sup>8</sup>Yale School of Public Health, New Haven, CT, USA

<sup>9</sup>Department of Health Policy and Management, Harvard T.H. Chan School of Public Health, Boston, MA, USA

\*Corresponding author:

Krishna P. Reddy, MD, MS

Medical Practice Evaluation Center

Massachusetts General Hospital

100 Cambridge Street, Suite 1600

Boston, MA 02114

1  
2  
3  
4  
5  
6  
7  
8  
9  
10  
11  
12  
13  
14  
15  
16  
17  
18  
19  
20  
21  
22  
23  
24  
25  
26  
27  
28  
29  
30  
31  
32  
33  
34  
35  
36  
37  
38  
39  
40  
41  
42  
43  
44  
45  
46  
47  
48  
49  
50  
51  
52  
53  
54  
55  
56  
57  
58  
59  
60

USA

Email: kpreddy@mgh.harvard.edu

Phone: +1 617-726-1993

**ABSTRACT WORD COUNT: 295**

**MAIN TEXT WORD COUNT: 3628**

For peer review only

## ABSTRACT

**Background and Objective:** Tobacco policymakers must consider how emerging products will change cigarette smoking behaviors and clinical outcomes. Our objective was to develop, calibrate, and validate a novel individual-level microsimulation model to project cigarette smoking behaviors and associated mortality risks. Unlike most tobacco models, our new model would explicitly include smoking relapse.

**Methods:** We developed the Simulating Tobacco and Nicotine Outcomes and Policy (STOP) model, in which individuals transition monthly between tobacco use states (current, former, or never) depending on rates of initiation, cessation, and relapse. Simulated individuals face tobacco use-stratified mortality risks. For US women and men, we performed internal validation of the model structure with a Cancer Intervention and Surveillance Modeling Network (CISNET) model. We then incorporated smoking relapse and calibrated cessation rates to reflect the difference between a transient quit attempt and sustained abstinence. We performed external validation with the National Health Interview Survey (NHIS) and the linked National Death Index. Comparisons were based on root-mean-square error (RMSE).

**Results:** In internal validation, STOP-generated projections of current/former/never smoking prevalence fit CISNET-projected data well (coefficient of variation [CV]-RMSE  $\leq 15\%$ ). After incorporating smoking relapse, multiplying the CISNET-reported cessation rates for women/men by 7.75/7.25, to reflect the ratio of quit attempts to sustained abstinence, resulted in the best approximation to CISNET-reported smoking prevalence (CV-RMSE 2%/3%). In external validation using these new multipliers, STOP-generated cumulative mortality curves for 20-year-old current smokers and never smokers each had CV-RMSE  $\leq 1\%$  compared to NHIS. In simulating those surveyed by NHIS in 1997, the STOP-projected

1  
2  
3 prevalence of current/former/never smokers annually (1998-2009) was similar to that reported by NHIS  
4  
5 (CV-RMSE 12%).  
6  
7  
8  
9

10 Conclusions: The STOP model, with relapse included, performed well when validated to US smoking  
11 prevalence and mortality. STOP provides a flexible framework for policy-relevant analysis of tobacco and  
12 nicotine product use.  
13  
14  
15

16  
17  
18  
19 Keywords: tobacco, nicotine, model, validation, calibration, relapse  
20  
21  
22

### 23 **STRENGTHS AND LIMITATIONS OF THIS STUDY**

24

- 25 • The STOP microsimulation model captures individual-level tobacco use behaviors and outcomes.
- 26 • The model is novel in incorporating relapse, a key factor in nicotine addiction.
- 27 • We validated STOP model results with those of another model and, in a partially dependent manner,  
28 with empirical data.
- 29 • We validated with multiple outcomes, including smoking prevalence and mortality.
- 30 • This analysis did not account for some aspects of heterogeneity in tobacco use behaviors.
- 31
- 32
- 33
- 34
- 35
- 36
- 37
- 38
- 39
- 40
- 41
- 42
- 43
- 44
- 45
- 46
- 47
- 48
- 49
- 50
- 51
- 52
- 53
- 54
- 55
- 56
- 57
- 58
- 59
- 60

## INTRODUCTION

In the US, tobacco smoking reduces life expectancy by over a decade and accounts for over \$200 billion in healthcare costs annually, approximately 9% of all healthcare costs in the country.[1,2] Though the prevalence of cigarette smoking among adults has decreased in the US, from 42% in 1965 to 14% in 2017, the decline has not been seen in all segments of society.[3,4] Meanwhile, tobacco treatment interventions, including behavioral therapy and pharmacotherapy, remain underutilized.[5]

Novel tobacco and nicotine products, including electronic cigarettes (e-cigs) and heated tobacco products, raise many new behavioral, clinical, and policy questions.[6,7] Trial- and cohort-based data to fully inform these questions will not be available for many years. In the meantime, a timely way to address these questions is via modeling.

Simulation models provide a critical complement to more traditional research approaches.[8–14]

Indeed, the Food and Drug Administration and the National Academies of Sciences, Engineering, and Medicine in the past year called for modeling studies to project the long-term effects, including both potential harms and benefits, of novel tobacco and nicotine products and regulatory policies to address them.[15,16] While multiple model-based studies of tobacco and nicotine products have been published,[17–25] most report aggregate trends, are focused at the population rather than individual level, and do not explicitly account for smoking relapse, a key component of the natural history and resource utilization of smoking cessation attempts. Our objective was to develop, calibrate, and validate a novel, individual-level microsimulation model that directly addresses the mechanics of smoking initiation, cessation, and relapse, and the associated clinical outcomes. The intended application of the model is to inform clinical and public health policy.



## METHODS

### Analytic overview

We developed a microsimulation model of tobacco- and nicotine-related behaviors, clinical outcomes, and treatments: the Simulating Tobacco and Nicotine Outcomes and Policy (STOP) model. In this analysis, we focused on cigarette smoking among US women and men to demonstrate that the STOP model, in simulating individuals' month-by-month smoking behaviors, can match historical smoking prevalence and mortality data. Our methods included: 1) performing internal validation to assess the model structure compared to another model; 2) incorporating smoking relapse and then calibrating smoking cessation probabilities to reflect the difference between a quit attempt and sustained abstinence; and 3) using our new relapse parameters, performing external validation to compare model outputs for mortality and for prevalence of current, former, and never smokers over time to empirical data from the National Health Interview Survey (NHIS) (table 1).

**Table 1. Characteristics of internal and external validation analyses for a new microsimulation model of smoking behaviors and outcomes.**

| Analysis                         | STOP-generated output of interest                                                           | Comparator                                                                                                 | Measure of goodness of fit |
|----------------------------------|---------------------------------------------------------------------------------------------|------------------------------------------------------------------------------------------------------------|----------------------------|
| Internal validation <sup>a</sup> | 1950 birth cohort prevalence of never, current, and former smokers, ages 0-70 years, by sex | CISNET-modeled 1950 birth cohort prevalence of never, current, and former smokers, ages 0-70 years, by sex | RMSE                       |
| External validation: mortality   | Cumulative mortality by age, sex, and smoking status                                        | Cumulative mortality and mortality rates of 1997-2009                                                      | MAPE and RMSE              |

NHIS respondents by age, sex,  
and smoking status

| External validation:<br>smoking prevalence | Prevalence of never, current,<br>and former smokers, annually,<br>1998-2009 | NHIS never, current, and<br>former smoking prevalence,<br>annually, 1998-2009 | RMSE |
|--------------------------------------------|-----------------------------------------------------------------------------|-------------------------------------------------------------------------------|------|
|--------------------------------------------|-----------------------------------------------------------------------------|-------------------------------------------------------------------------------|------|

STOP: Simulating Tobacco and Nicotine Outcomes and Policy model. CISNET: Cancer Intervention and Surveillance Monitoring Network. NHIS: National Health Interview Survey. RMSE: root-mean-square error. MAPE: mean absolute percentage error. <sup>a</sup>The initial internal validation did not include smoking relapse. In the subsequent calibration step, we incorporated smoking relapse and calibrated cessation to achieve a good fit to the CISNET-modeled 1950 birth cohort prevalence of never, current, and former smokers.

Because there is no consensus criterion by which to compare model-generated results to surveillance data, expert guidance suggests choosing a criterion appropriate for the model structure and data sources.[26] Similar to methods used in validating other models, we chose root-mean-square error (RMSE, for cumulative risks and time-varying prevalence estimates) and mean absolute percentage error (MAPE, for mortality rates) to evaluate the goodness-of-fit between STOP model results and data sources.[26–32] We applied the coefficient of variation of RMSE (CV-RMSE) as a relative measure of error.

### Model structure

The STOP model is an individual-level Monte Carlo microsimulation.[33,34] An individual enters the model with age and smoking status defined by random realizations from specified probability

1  
2  
3 distributions. The model follows a state-transition framework: individuals transition monthly through  
4 various cigarette smoking states reflecting never, current, or former smoking status. Transitions  
5 between these states depend on age- and sex-stratified monthly smoking initiation and cessation  
6 probabilities. For ex-smokers there are monthly relapse probabilities (figure 1). Monthly mortality  
7 probabilities depend on age, sex, and smoking status. Those who quit smoking retain the all-cause  
8 mortality probabilities of current smokers until they have remained abstinent for a defined period of  
9 time (e.g., five years), after which the mortality probabilities decline.[1,8,35]  
10  
11  
12  
13  
14  
15  
16  
17  
18  
19  
20

21 Individuals are simulated in series: for each simulated person, the model tracks smoking behavioral  
22 events (smoking initiation, quit attempt, relapse) and the duration spent in each smoking state. Upon an  
23 individual's death, the next simulated person enters the model. Once a cohort large enough to attain  
24 stable estimates has been simulated, summary statistics are calculated, including mean number of quit  
25 attempts, life expectancy, and the monthly prevalence of never, current, and former smokers.  
26  
27  
28  
29  
30  
31  
32  
33  
34

### 35 **Internal validation**

#### 36 *Overview and outcome comparisons*

37  
38 We conducted internal model validation (technical verification) by simulating the US population born in  
39 1950, following them monthly until the year 2020, and then comparing STOP results to those from  
40 modeling studies from the Cancer Intervention and Surveillance Modeling Network (CISNET) Lung  
41 Working Group (table 1 and supplementary text).[26] We selected the 1950 birth cohort because  
42 smoking prevalence in the US peaked in the 1960s, which was the smoking initiation period  
43 (adolescence) for these individuals, and data collection frequency increased concurrently. We compared  
44 STOP-generated results to CISNET-reported results for the prevalence of female and male current,  
45 former, and never smokers over time.[35]  
46  
47  
48  
49  
50  
51  
52  
53  
54  
55  
56  
57  
58  
59  
60

We used CV-RMSE to assess the goodness of fit of the six sets of prevalence curves.[27,30] First, RMSE was calculated as the square root of the average of the squared difference between STOP-projected prevalence (among all simulated individuals who are alive) and CISNET-projected prevalence at each year of age. Then, we calculated CV-RMSE by dividing RMSE by mean modeled prevalence, representing the relative error.

#### *Input parameters for initial internal validation*

For the initial internal validation exercise, we used data from CISNET modeling studies, which were derived from NHIS and were stratified by birth cohort (table 2).[36,37] Specifically, we used CISNET age- and sex-stratified smoking initiation and cessation rates and smoking-stratified mortality rates among US women and men born in 1950, converting them to monthly probabilities. The CISNET smoking cessation rates reflected a direct transition from current smoker to former smoker after at least two years of sustained abstinence.[36] This initial internal validation exercise did not include smoking relapse.

**Table 2. STOP model input parameters applied in validation exercises.**

| Variable                               | Internal validation | External validation: | External validation: |
|----------------------------------------|---------------------|----------------------|----------------------|
|                                        |                     | mortality            | smoking prevalence   |
| <b>Source</b>                          | CISNET              | NHIS 1997-2009       | NHIS 1997            |
| <b>Baseline cohort characteristics</b> |                     |                      |                      |
| Women/Men, % <sup>a</sup>              | ---                 | 52/48                | 52/48                |
| Initial age, mean, years (SD)          | 0                   | 39.7 (21.4)          | 39.1 (20.7)          |

|                             |         |             |             |
|-----------------------------|---------|-------------|-------------|
| Minimum/maximum age, years  | ---     | 18/84       | 18/84       |
| Initial prevalence of       |         |             |             |
| never/current/former        | 100/0/0 | 56/22/22    | 52/25/23    |
| smokers <sup>b</sup> , %    |         |             |             |
| Years since cessation among |         |             |             |
| former smokers, mean (SD)   | ---     | 15.6 (12.7) | 14.4 (11.9) |

### Smoking behavior events

|                             |          |  |          |
|-----------------------------|----------|--|----------|
| Monthly smoking initiation  |          |  |          |
| probability, by age and sex | 0-0.0093 |  | 0-0.0063 |
| Monthly smoking cessation   |          |  |          |
| probability, by age and sex | 0-0.015  |  | 0-0.035  |

### Clinical events

|                                              |                    |  |           |
|----------------------------------------------|--------------------|--|-----------|
| Monthly mortality probability <sup>c</sup> , |                    |  |           |
| by age and sex, x 10 <sup>-4</sup>           |                    |  |           |
| Never smokers                                | 0-12.8             |  | 0.4-95.2  |
| Current smokers                              | 0-34.6             |  | 0.4-136.1 |
| Former smokers                               | Multiplier applied |  | 0-111.5   |

### Source: based on smoking studies or calibrated

|                                          |           |                                             |         |
|------------------------------------------|-----------|---------------------------------------------|---------|
| Monthly relapse probability <sup>d</sup> |           |                                             |         |
| ( <i>t</i> = months since cessation)     |           | $P_{\text{Relapse}} = 0.62 * e^{-0.33 * t}$ |         |
| Cessation rate multiplier                |           |                                             |         |
| (calibrated), women/men                  | 7.75/7.25 | 7.75/7.25                                   | 7.5/7   |
| Initiation rate multiplier               |           |                                             |         |
| (calibrated), women/men                  | ---       | ---                                         | 0.9/1.0 |

1  
2  
3 Former smoker mortality

4 multiplier, applied to never

5 1.0-2.2

6 ---

7 ---

8 smoker mortality, by sex and

9 age at quit<sup>e</sup>

10  
11  
12 STOP: Simulating Tobacco and Nicotine Outcomes and Policy. CISNET: Cancer Intervention and  
13 Surveillance Modeling Network. NHIS: National Health Interview Survey. SD: standard deviation. The  
14 numbers show model input parameters applied in internal validation (left), external validation of  
15 mortality (center), and external validation of smoking prevalence (right).  
16  
17  
18  
19  
20  
21  
22

23 <sup>a</sup>In internal validation, we simulated cohorts of either all women or all men from birth. Thus, no  
24 distributions of initial age are displayed.  
25  
26  
27

28  
29  
30 <sup>b</sup>Prevalence of each smoking status displayed here is the mean over all strata, but in the model these  
31 were stratified by 5-year age group and sex from ages 18 to 84.  
32  
33  
34  
35

36  
37 <sup>c</sup>Additional details about mortality data are in supplementary table 2.  
38  
39  
40

41 <sup>d</sup>This is based on relapse probabilities reported in smoking cessation intervention trials, focusing on  
42 placebo arms.[38–41]  
43  
44  
45

46  
47  
48 <sup>e</sup>CISNET-derived former smoker mortality rates are often lower than CISNET-derived never smoker  
49 mortality rates for the 1950 birth cohort – a relationship with questionable face validity. We therefore  
50 adapted former smoker mortality multipliers for the internal validation from Thun et al.[35]  
51  
52  
53  
54  
55  
56  
57  
58  
59  
60

### *Incorporating smoking relapse and calibrating cessation probabilities*

A novel aspect of the STOP model is the explicit inclusion of smoking relapse. Relapse is critical to projecting both short-term and long-term impacts of smoking cessation interventions and novel tobacco and nicotine products.

The STOP model distinguishes between three states for those who have ever smoked: 1) Current Smoker; 2) Smoker who Recently Stopped; 3) Former Smoker (figure 1). This enables a differentiation between: 1) transient quit attempts: transition from the Current Smoker state to the Smoker who Recently Stopped state, with a relatively high rate of early relapse back to the Current Smoker state; and 2) sustained abstinence: transition from the Smoker who Recently Stopped state to the Former Smoker state, with a lower rate of later relapse back to the Current Smoker state.

Following the initial internal validation of the STOP model (without relapse), we added probabilities of smoking relapse and then recalibrated the model by adjusting the previously-applied smoking cessation probabilities. First, we modeled relapse as an exponential decay function of time since quit, such that the highest risk of relapse was in the first month after a quit attempt. The coefficient and time constant are based on relapse probabilities in smoking cessation trials (table 2).[38–41] Second, we calibrated the previously-applied cessation probabilities (derived from CISNET cessation data) by a multiplier to reflect: 1) a quit attempt rather than sustained abstinence; and 2) the higher likelihood of making a quit attempt rather than attaining sustained abstinence in a given month. This multiplier represents the average number of quit attempts, lasting at least one month, prior to attaining sustained abstinence. We compared our multipliers to published data on the average number of quit attempts required to attain sustained abstinence.[42] Our overall aim for this calibration step was to identify a STOP-generated

1  
2  
3 current smoker prevalence curve with an RMSE <0.01 compared to the CISNET model-generated current  
4  
5 smoker prevalence curve, in line with previously described methods.[30]  
6  
7  
8  
9

## 10 **External validation**

### 11 *Overview and outcome comparisons*

12  
13 For external validation, we compared STOP model results to NHIS data rather than to the results of  
14  
15 another model (CISNET).[26,43] We accounted for smoking initiation, smoking cessation, and mortality.  
16  
17 Because NHIS data do not explicitly report relapse, we incorporated smoking relapse and the best-fitting  
18  
19 cessation multipliers found in the interval validation calibration step. We compared two outcomes:  
20  
21 mortality and smoking prevalence (table 1 and supplementary text).  
22  
23  
24  
25  
26  
27

28 First, to project and validate mortality outcomes, we simulated the population surveyed by NHIS from  
29  
30 1997 through 2009 (supplementary text). We used MAPE to compare STOP-generated mortality rates to  
31  
32 those derived from NHIS, stratified by age, sex, and smoking status. MAPE was the mean absolute value  
33  
34 of the percent difference between STOP and NHIS values. We also produced curves of cumulative  
35  
36 mortality from STOP-generated results and from NHIS data, stratified by sex and by current/never  
37  
38 smoking status. We compared the four sets of cumulative mortality curves by the RMSE and CV-RMSE  
39  
40 (STOP versus NHIS) from age 20 years until age 84 years (goal RMSE <0.01). We did not generate  
41  
42 cumulative mortality curves for former smokers in this step because mortality risks depend on age at  
43  
44 cessation, and this heterogeneous group would include people who quit smoking at a variety of  
45  
46 ages.[1,35]  
47  
48  
49  
50  
51

52 Second, with those surveyed by NHIS in 1997 as the input cohort, we used the STOP model to project  
53  
54 the prevalence of current, former, and never smokers each year from 1998 to 2009. In a two-way  
55  
56  
57  
58  
59  
60



1  
2  
3 sensitivity analysis, we re-calibrated cessation multipliers along with initiation multipliers with the goal  
4 of identifying multipliers that would minimize the CV-RMSE of STOP-reported current smoker  
5 prevalence compared to NHIS current smoker prevalence. The initiation multipliers were applied to  
6 smoking initiation rates for never smokers. We then compared the cessation multipliers from this step  
7 with those from the internal validation calibration step.  
8  
9  
10  
11  
12  
13  
14  
15

### 16 *Input parameters*

17  
18 The initial distributions of age, sex, and smoking status for the population simulated in the external  
19 validation exercises came from two sources: aggregated 1997-2009 NHIS data for the mortality external  
20 validation, and 1997 NHIS data for the smoking prevalence external validation (table 2 and  
21 supplementary figure 1). We obtained NHIS data in aggregate for years 1997-2009 from the Integrated  
22 Public Use Microdata Series.[44] These data provided initial distributions of smoking status and years of  
23 abstinence for former smokers (to inform relapse risks). From these 1997-2009 NHIS data, we derived  
24 age- and sex-specific smoking initiation and cessation rates using self-reported age at initiation and age  
25 at cessation variables (supplementary table 1). As in our internal validation exercises, we converted the  
26 cessation rates to quit attempt rates by incorporating relapse rates and cessation multipliers.  
27  
28  
29  
30  
31  
32  
33  
34  
35  
36  
37  
38  
39  
40

41 The NHIS data include linked National Death Index (NDI) mortality outcomes through 2011 for  
42 respondents for whom mortality data are available. We calculated mortality rates by age, sex, and  
43 smoking status of the same NHIS respondents (supplementary table 1).  
44  
45  
46  
47  
48  
49

### 50 **Patient and public involvement**

51 We did not involve patients or the public in our work.  
52  
53  
54  
55  
56  
57  
58  
59  
60

## RESULTS

### Internal validation

#### *Initial internal validation, without relapse*

The STOP-projected prevalence of current, former, and never smokers over time fit CISNET-projected data well for the 1950 birth cohort in the US (figure 2, blue line vs. red dotted line, RMSE <0.03, CV-RMSE 15%/7% for women/men). The STOP-estimated prevalence of current smokers at age 25 years, approaching peak prevalence for the 1950 birth cohort, was 40% for women and 54% for men, compared to CISNET estimates of 38% and 52%.

#### *Incorporating smoking relapse and calibrating cessation probabilities*

After incorporating smoking relapse, the prevalence of current smokers far exceeded that reported by the CISNET model, as expected since many of those who would have become former smokers reverted to being current smokers (figure 2, pink dashed lines). We then aimed to reflect all quit attempts rather than only transitions to sustained abstinence. In rough calibrations, we found that the optimal multiplier would be between 5 and 10 when applied to cessation rates from the previous step. In finer calibrations, we varied the multiplier across the range of 5 to 10 in increments of 0.25. We found that multiplying the CISNET-reported cessation rates by 7.75 for women and by 7.25 for men best approximated the CISNET-projected prevalence of current smokers, with RMSE 0.004/0.008 and CV-RMSE 2%/3% for women/men (figure 2, black lines). These multipliers fall within the published range of values for average number of quit attempts needed for successful abstinence.[42,45,46]

## External validation

### *Mortality*

In simulating the 1997-2009 NHIS population along with smoking relapse, we found that the age-, sex-, and smoking-stratified mortality rates generated by the STOP model were a good fit to those derived from NHIS (MAPE 7%, examples in supplementary table 2). The cumulative mortality curves for 20 year-old female and male current smokers and never smokers were similar between STOP projections and NHIS-derived data, with RMSE <0.01 and CV-RMSE ≤1% (figure 3). For those alive at age 20 years who continued to smoke until death, the STOP model predicted median life expectancy (counting years from birth) of 77.5 years for women and 72.5 years for men. These are similar to the median life expectancies for 30 year-old smokers reported by Jha et al. (also derived from NHIS data): 77 years for women and 72 years for men.[1]

### *Smoking prevalence*

Using those surveyed by NHIS in 1997 as the input cohort, the STOP-projected prevalence of current, former, and never smokers each year from 1998 to 2009 was similar to that reported by NHIS, with overall RMSE 0.04 and CV-RMSE 12% for both women and men (ages 30-84 years combined; supplementary figure 2 shows results specifically for ages 40-44 years). Compared to NHIS, the STOP model slightly underpredicted never smoker prevalence and slightly overpredicted former smoker prevalence in later years. In the two-way sensitivity analysis, we found that cessation multipliers of 7.5/7.0 for women/men and initiation multipliers of 0.9/1.0 resulted in the best overall fit (lowest RMSE) of STOP-projected current smoker prevalence compared to that reported by NHIS (supplementary figure 3).

## DISCUSSION

We developed, calibrated, and validated STOP, a novel microsimulation model of tobacco use behaviors and outcomes. Our initial model input parameters included smoking initiation and cessation and smoking-stratified mortality, and we demonstrated internal validity compared to the CISNET model. After incorporating relapse, we calibrated smoking cessation probabilities to reflect quit attempts rather than sustained abstinence. We then validated STOP model output with: 1) smoking prevalence over time reported by the CISNET model for US women and men born in 1950; 2) age-, sex-, and smoking-stratified mortality rates and cumulative mortality reported by the NHIS-NDI linked database for the years 1997-2009; and 3) prevalence of current, former, and never smokers by sex from 1998 to 2009 reported by NHIS, using 1997 NHIS-reported population characteristics as inputs.

The STOP model simulates individual-level tobacco use behaviors and associated clinical outcomes. Most existing tobacco models simulate at the population level or lack the capacity to consider smoking initiation and (non-sustained) quit attempts throughout a lifetime.[18,23–25,37,47,48] The individual-level details of STOP can be employed to simulate and compare behaviors and interventions. While this validation and calibration analysis focused on cigarette smoking because of the availability of historical data for comparisons, we intend to broaden the use of STOP to include e-cigs. Longitudinal cohort studies and clinical trials are examining the effects of e-cig use on tobacco smoking behaviors and clinical outcomes over long time horizons, but data are needed now to inform guidelines and policy around these novel products.[15,40,49,50] Results from multiple distinct, validated models can help motivate policy decisions, and consistency of policy recommendations across unique, independent models reinforces confidence in their recommendations.[51–55]

1  
2  
3 A novel aspect of the STOP model is the incorporation of smoking relapse, reflecting the understanding  
4 of nicotine addiction and tobacco use as a chronic relapsing condition.[41,45,56–59] This key feature  
5 enables an important distinction between a quit attempt and sustained abstinence. This distinction is  
6 missing from most tobacco models and indeed from many epidemiologic studies of smoking and  
7 smoking cessation, which consider the transition from “current” to “former” smoker to be an abrupt  
8 one that results in sustained abstinence. Incorporating relapse required calibrating cessation rates by  
9 applying multipliers. The cessation multipliers that provided the best fits to empirical data are in line  
10 with published data regarding the number of quit attempts required before sustained abstinence is  
11 achieved.[42,45,46] The slightly higher multiplier needed for women compared to men is consistent  
12 with NHIS data showing that among ever smokers (current smokers plus former smokers) aged 60 years  
13 and above, a greater proportion of women compared to men are former smokers.[44]

14  
15  
16  
17  
18  
19  
20  
21  
22  
23  
24  
25  
26  
27  
28  
29  
30 Many trials of smoking cessation interventions follow patients for a few months or up to one year, but  
31 they do not report subsequent relapse. By including relapse, the STOP model can combine data from  
32 short-term trials of smoking cessation interventions with data from natural history studies of smoking  
33 and smoking cessation to project longer-term outcomes. In capturing changes in an individual’s smoking  
34 behaviors over time, the STOP model can assess the efficacy of tobacco cessation interventions both in  
35 the short-term, by the interventions promoting quit attempts, and in the long-term, by the interventions  
36 reducing relapse and promoting sustained abstinence. The flexibility to integrate data from a variety of  
37 sources is a strength of modeling analyses.

38  
39  
40  
41  
42  
43  
44  
45  
46  
47  
48  
49  
50 Going forward, we plan to use the STOP model to study contemporary rather than historical populations  
51 and to predict future tobacco use. As no empirical data exist with which to validate model output of  
52 future tobacco use, we validated STOP model output against historical populations. Most US historical  
53  
54  
55  
56  
57  
58  
59  
60

1  
2  
3 data on smoking prevalence and smoking-associated mortality are based at least in part on NHIS, the  
4 oldest ongoing survey of smoking prevalence in the US.[1,4,60,61] We compared STOP model output to  
5  
6 CISNET model output, to NHIS itself, and to results from a study by Jha et al.,[1] all of which used NHIS  
7  
8 data. We demonstrated internal validity of STOP compared to CISNET model results when using CISNET  
9  
10 input parameters and then added relapse probabilities and cessation multipliers. We demonstrated  
11  
12 external validity, in a partially dependent manner, of STOP compared to NHIS data when using some  
13  
14 NHIS-derived input parameters plus the external relapse probabilities and cessation multipliers from our  
15  
16 internal validation. Though independent external validation sources are ideal, dependent sources can  
17  
18 still be useful, especially in this scenario where most of the available US historical smoking prevalence,  
19  
20 behavior, and mortality data are derived from NHIS.[26] Of note, in a two-way sensitivity analysis in  
21  
22 which we simultaneously varied the smoking initiation and cessation multipliers to achieve a close fit to  
23  
24 NHIS smoking prevalence data, the optimal cessation multipliers were very similar to those we found in  
25  
26 our internal validation calibration step, demonstrating the robustness of these multipliers across  
27  
28 different sets of assumptions.  
29  
30  
31  
32  
33  
34  
35  
36

37 In an external validation exercise, the STOP model projection for never smoker prevalence from 1998 to  
38  
39 2009 was slightly lower than that reported by NHIS, and the STOP model projection for former smoker  
40  
41 prevalence was slightly higher than NHIS data. In NHIS, former smokers were self-defined but on  
42  
43 average had been abstinent for over a decade. NHIS considered those who smoked “some days” to be  
44  
45 current smokers. STOP formally labels these people, who may have been abstinent from smoking for  
46  
47 only a very short duration, former smokers but assigns them the mortality risks of current smokers (until  
48  
49 a defined period of abstinence). Thus, one would expect the STOP model to predict a higher prevalence  
50  
51 of former smokers than NHIS, as seen in our results. Immigration could also account for some of the  
52  
53 difference between NHIS data and STOP model-generated results: immigrants were surveyed in NHIS  
54  
55  
56  
57  
58  
59  
60

1  
2  
3 but our model analysis does not account for them. Smoking prevalence differs between the immigrant  
4 and non-immigrant populations.[62,63]  
5  
6  
7  
8  
9

10 The STOP model has features, and will have applications, not described in this analysis. We developed  
11 the model to incorporate resource utilization. The STOP model can capture the healthcare costs  
12 associated with being a current, former, or never smoker, as well as the costs of tobacco cessation  
13 interventions. By incorporating the chronic relapsing nature of nicotine addiction, the STOP model can  
14 account for the resources required for recurrent cessation interventions (e.g., restarting the same or a  
15 different intervention after smoking relapse), an important consideration in cost-effectiveness and  
16 policy analyses. Ultimately, we will use the STOP model to evaluate behavioral and clinical outcomes,  
17 costs of care, and cost-effectiveness of tobacco cessation interventions, programs, and policies. An  
18 overarching goal is to provide information that can inform decision makers – including clinicians, public  
19 health officials, and policymakers – on cost-effective interventions that reduce the clinical and economic  
20 burden of tobacco use. The model can eventually assess the impact of different financing options for  
21 tobacco cessation interventions – for example, annual versus lifetime insurance coverage limits. The  
22 flexibility in the STOP model structure will allow for analyses beyond US populations, including settings  
23 where smoking-related behaviors and clinical outcomes may be different from those in the US.[64]  
24  
25  
26  
27  
28  
29  
30  
31  
32  
33  
34  
35  
36  
37  
38  
39  
40  
41  
42

43 The STOP model has limitations. Its projections are limited by the degree of specificity of available data –  
44 for example, age, sex, and birth year stratifications of smoking behavioral transitions. However,  
45 probabilities of these transitions can be varied in sensitivity analysis. STOP does not include dynamics  
46 such as the effects of one person's smoking on another person's smoking behaviors. Smoking is  
47 associated with other factors not directly captured by STOP, including race, socioeconomic status,  
48 mental illness, and other substance use, but different populations can be separately simulated in the  
49  
50  
51  
52  
53  
54  
55  
56  
57  
58  
59  
60

1  
2  
3 model with input parameters specific to that population. There is considerable heterogeneity in smoking  
4 behaviors, including cigarettes consumed per day and daily versus nondaily smoking. STOP enables  
5 stratification by intensity of smoking, which can be used to represent amount or frequency of smoking.  
6  
7  
8  
9

10  
11  
12 In conclusion, STOP is a novel, individual-level microsimulation model that captures tobacco-related  
13 behaviors – importantly including relapse – and outcomes with a goal of informing decision making  
14 around tobacco cessation interventions and tobacco policy. We have demonstrated that the model is  
15 well-calibrated and validated to historical cohorts. We plan to use the model for policy-relevant analysis  
16 of contemporary patient-level and population-level care while reflecting real-life tobacco use and  
17 cessation behaviors.  
18  
19  
20  
21  
22  
23  
24  
25  
26  
27  
28  
29  
30  
31  
32  
33  
34  
35  
36  
37  
38  
39  
40  
41  
42  
43  
44  
45  
46  
47  
48  
49  
50  
51  
52  
53  
54  
55  
56  
57  
58  
59  
60



## **AUTHOR CONTRIBUTIONS**

Specific contributions are as follows:

KPR – study conception, study design, data analysis, data interpretation

AJB – study design, data analysis, data interpretation

DEL – study design, data interpretation

PT – data analysis, data interpretation

EPH – study design, data interpretation

TH – study conception, study design, data analysis

BO – study design

LY – data analysis, data interpretation

FMS – study design, data analysis, data interpretation

ADP – study design, data interpretation

KAF – study design, data interpretation

MCW – study design, data interpretation

NAR – study conception, study design, data interpretation

RPW – study conception, study design, data interpretation

KPR drafted the first version of the manuscript. All authors critically reviewed the manuscript for important intellectual content and approved the final submitted version.

### COMPETING INTERESTS

NAR receives royalties from UpToDate, Inc., is a consultant for Achieve Life Sciences, and has been an unpaid consultant for Pfizer. All other authors report no competing interests.

### SOURCES OF FUNDING

This work was supported by awards from the National Institute on Drug Abuse (K01 DA042687) and the National Heart, Lung, and Blood Institute (K01 HL123349) of the National Institutes of Health, and the Steve and Deborah Gorlin MGH Research Scholars Award. The funding sources had no role in the design, analysis, or interpretation of the study, the writing of the manuscript, or in the decision to submit the manuscript for publication. The content is solely the responsibility of the authors and does not necessarily represent the official views of the National Institutes of Health or Massachusetts General Hospital.

## REFERENCES

- 1 Jha P, Ramasundarahettige C, Landsman V, *et al*. 21st-century hazards of smoking and benefits of cessation in the United States. *N Engl J Med* 2013;**368**:341–50. doi:10.1056/NEJMsa1211128
- 2 Xu X, Bishop EE, Kennedy SM, *et al*. Annual healthcare spending attributable to cigarette smoking: an update. *Am J Prev Med* 2015;**48**:326–33. doi:10.1016/j.amepre.2014.10.012
- 3 US Department of Health and Human Services. *The health consequences of smoking-50 years of progress: a report of the Surgeon General*. Atlanta, GA: US Department of Health and Human Services, Centers for Disease Control and Prevention, National Center for Chronic Disease Prevention and Health Promotion, Office on Smoking and Health, 2014.  
<https://www.hhs.gov/surgeongeneral/reports-and-publications/tobacco/index.html>
- 4 Wang TW, Asman K, Gentzke AS, *et al*. Tobacco product use among adults - United States, 2017. *MMWR Morb Mortal Wkly Rep* 2018;**67**:1225–32. doi:10.15585/mmwr.mm6744a2
- 5 Patel KK, Jones PG, Ellerbeck EF, *et al*. Underutilization of evidence-based smoking cessation support strategies despite high smoking addiction burden in peripheral artery disease specialty care: insights from the international PORTRAIT registry. *J Am Heart Assoc* 2018;**7**:e010076.  
doi:10.1161/JAHA.118.010076
- 6 Office of the Commissioner, US Food and Drug Administration. FDA finalizes guidance for premarket tobacco product applications for electronic nicotine delivery systems as part of commitment to continuing a strong oversight of e-cigarettes. 11 Jun 2019. <http://www.fda.gov/news-events/press-announcements/fda-finalizes-guidance-premarket-tobacco-product-applications-electronic-nicotine-delivery-systems> (accessed 19 Jun 2019).
- 7 Office of the Commissioner, US Food and Drug Administration. FDA permits sale of IQOS Tobacco Heating System through premarket tobacco product application pathway. 30 Apr 2019.

- 1  
2  
3 <http://www.fda.gov/news-events/press-announcements/fda-permits-sale-iqos-tobacco-heating->  
4 [system-through-premarket-tobacco-product-application-pathway](http://www.fda.gov/news-events/press-announcements/fda-permits-sale-iqos-tobacco-heating-) (accessed 19 Jun 2019).  
5  
6  
7  
8 Reddy KP, Parker RA, Losina E, *et al.* Impact of cigarette smoking and smoking cessation on life  
9  
10 expectancy among people with HIV: a US-based modeling study. *J Infect Dis* 2016;**214**:1672–81.  
11  
12 doi:10.1093/infdis/jiw430  
13  
14 Reddy KP, Kong CY, Hyle EP, *et al.* Lung cancer mortality associated with smoking and smoking  
15  
16 cessation among people living with HIV in the United States. *JAMA Intern Med* 2017;**177**:1613–21.  
17  
18 doi:10.1001/jamainternmed.2017.4349  
19  
20  
21 10 Apelberg BJ, Feirman SP, Salazar E, *et al.* Potential public health effects of reducing nicotine levels in  
22  
23 cigarettes in the United States. *N Engl J Med* 2018;**378**:1725–33. doi:10.1056/NEJMs1714617  
24  
25  
26 11 Walensky RP, Ross EL, Kumarasamy N, *et al.* Cost-effectiveness of HIV treatment as prevention in  
27  
28 serodiscordant couples. *N Engl J Med* 2013;**369**:1715–25. doi:10.1056/NEJMs1214720  
29  
30  
31 12 Reddy KP, Gupta-Wright A, Fielding KL, *et al.* Cost-effectiveness of urine-based tuberculosis  
32  
33 screening in hospitalised patients with HIV in Africa: a microsimulation modelling study. *Lancet Glob*  
34  
35 *Health* 2019;**7**:e200–8. doi:10.1016/S2214-109X(18)30436-4  
36  
37  
38 13 Weinstein MC, O'Brien B, Hornberger J, *et al.* Principles of good practice for decision analytic  
39  
40 modeling in health-care evaluation: report of the ISPOR Task Force on Good Research Practices--  
41  
42 Modeling Studies. *Value Health* 2003;**6**:9–17.  
43  
44  
45 14 Sanders GD, Neumann PJ, Basu A, *et al.* Recommendations for conduct, methodological practices,  
46  
47 and reporting of cost-effectiveness analyses: Second Panel on Cost-Effectiveness in Health and  
48  
49 Medicine. *JAMA* 2016;**316**:1093–103. doi:10.1001/jama.2016.12195  
50  
51  
52 15 National Academies of Sciences, Engineering, and Medicine. *Public Health Consequences of E-*  
53  
54 *Cigarettes*. Washington, DC: The National Academies Press, 2018. doi:10.17226/24952  
55  
56  
57  
58  
59  
60

- 1  
2  
3 16 Office of Disease Prevention, National Institutes of Health. Tobacco regulatory research priorities.  
4  
5 <https://prevention.nih.gov/tobacco-regulatory-research/tobacco-regulatory-research-priorities>  
6  
7 (accessed 6 Jun 2019).  
8  
9
- 10 17 Levy DT, Cummings KM, Villanti AC, *et al.* A framework for evaluating the public health impact of e-  
11  
12 cigarettes and other vaporized nicotine products. *Addiction* 2017;**112**:8–17. doi:10.1111/add.13394  
13
- 14 18 Levy DT, Yuan Z, Li Y, *et al.* A modeling approach to gauging the effects of nicotine vaping product  
15  
16 use on cessation from cigarettes: what do we know, what do we need to know? *Addiction* Published  
17  
18 Online First: 12 December 2018. doi:10.1111/add.14530  
19
- 20 19 Warner KE, Mendez D. E-cigarettes: comparing the possible risks of increasing smoking initiation  
21  
22 with the potential benefits of increasing smoking cessation. *Nicotine Tob Res* 2019;**21**:41–7.  
23  
24 doi:10.1093/ntr/nty062  
25  
26
- 27 20 Cherng ST, Tam J, Christine P, *et al.* Modeling the effects of e-cigarettes on smoking behavior:  
28  
29 implications for future adult smoking prevalence. *Epidemiology* 2016;**27**:819–26.  
30  
31 doi:10.1097/EDE.0000000000000497  
32  
33
- 34 21 Kalkhoran S, Glantz SA. Modeling the health effects of expanding e-cigarette sales in the United  
35  
36 States and United Kingdom: a Monte Carlo analysis. *JAMA Intern Med* 2015;**175**:1671–80.  
37  
38 doi:10.1001/jamainternmed.2015.4209  
39  
40
- 41 22 Vugrin ED, Rostron BL, Verzi SJ, *et al.* Modeling the potential effects of new tobacco products and  
42  
43 policies: a dynamic population model for multiple product use and harm. *PLoS One*  
44  
45 2015;**10**:e0121008. doi:10.1371/journal.pone.0121008  
46  
47
- 48 23 Levy DT, Borland R, Lindblom EN, *et al.* Potential deaths averted in USA by replacing cigarettes with  
49  
50 e-cigarettes. *Tob Control* 2018;**27**:18–25. doi:10.1136/tobaccocontrol-2017-053759  
51
- 52 24 Soneji SS, Sung H-Y, Primack BA, *et al.* Quantifying population-level health benefits and harms of e-  
53  
54 cigarette use in the United States. *PLoS One* 2018;**13**:e0193328. doi:10.1371/journal.pone.0193328  
55  
56  
57  
58  
59

- 1  
2  
3 25 Levy DT, Borland R, Villanti AC, *et al.* The application of a decision-theoretic model to estimate the  
4 public health impact of vaporized nicotine product initiation in the United States. *Nicotine Tob Res*  
5 2017;**19**:149–59. doi:10.1093/ntr/ntw158  
6  
7  
8  
9  
10 26 Eddy DM, Hollingworth W, Caro JJ, *et al.* Model transparency and validation: a report of the ISPOR-  
11 SMDM Modeling Good Research Practices Task Force-7. *Med Decis Making* 2012;**32**:733–43.  
12 doi:10.1177/0272989X12454579  
13  
14  
15  
16 27 Vanni T, Karnon J, Madan J, *et al.* Calibrating models in economic evaluation: a seven-step approach.  
17 *Pharmacoeconomics* 2011;**29**:35–49. doi:10.2165/11584600-000000000-00000  
18  
19  
20  
21 28 Karnon J, Vanni T. Calibrating models in economic evaluation: a comparison of alternative measures  
22 of goodness of fit, parameter search strategies and convergence criteria. *Pharmacoeconomics*  
23 2011;**29**:51–62. doi:10.2165/11584610-000000000-00000  
24  
25  
26  
27 29 Cevik M, Ergun MA, Stout NK, *et al.* Using active learning for speeding up calibration in simulation  
28 models. *Med Decis Making* 2016;**36**:581–93. doi:10.1177/0272989X15611359  
29  
30  
31  
32 30 Ciaranello AL, Morris BL, Walensky RP, *et al.* Validation and calibration of a computer simulation  
33 model of pediatric HIV infection. *PLoS One* 2013;**8**:e83389. doi:10.1371/journal.pone.0083389  
34  
35  
36  
37 31 Rydzak CE, Cotich KL, Sax PE, *et al.* Assessing the performance of a computer-based policy model of  
38 HIV and AIDS. *PLoS One* 2010;**5**. doi:10.1371/journal.pone.0012647  
39  
40  
41 32 Kazemian P, Wexler DJ, Fields NF, *et al.* Development and validation of PREDICT-DM: a new  
42 microsimulation model to project and evaluate complications and treatments of type 2 diabetes  
43 mellitus. *Diabetes Technol Ther* 2019;**21**:344–55. doi:10.1089/dia.2018.0393  
44  
45  
46  
47 33 Weinstein MC. Recent developments in decision-analytic modelling for economic evaluation.  
48 *Pharmacoeconomics* 2006;**24**:1043–53. doi:10.2165/00019053-200624110-00002  
49  
50  
51  
52 34 Rutter CM, Zaslavsky A, Feuer E. Dynamic microsimulation models for health outcomes: a review.  
53 *Med Decis Making* 2011;**31**:10–8. doi:10.1177/0272989X10369005  
54  
55  
56  
57  
58  
59  
60

- 1  
2  
3 35 Thun MJ, Carter BD, Feskanich D, *et al.* 50-year trends in smoking-related mortality in the United  
4 States. *N Engl J Med* 2013;**368**:351–64. doi:10.1056/NEJMsa1211127  
5  
6  
7 36 Holford TR, Levy DT, McKay LA, *et al.* Patterns of birth cohort-specific smoking histories, 1965-2009.  
8 *Am J Prev Med* 2014;**46**:e31-37. doi:10.1016/j.amepre.2013.10.022  
9  
10  
11 37 Holford TR, Meza R, Warner KE, *et al.* Tobacco control and the reduction in smoking-related  
12 premature deaths in the United States, 1964-2012. *JAMA* 2014;**311**:164–71.  
13  
14  
15  
16  
17  
18  
19 38 Tonstad S, Tønnesen P, Hajek P, *et al.* Effect of maintenance therapy with varenicline on smoking  
20 cessation: a randomized controlled trial. *JAMA* 2006;**296**:64–71. doi:10.1001/jama.296.1.64  
21  
22  
23 39 Brendryen H, Kraft P. Happy Ending: a randomized controlled trial of a digital multi-media smoking  
24 cessation intervention. *Addiction* 2008;**103**:478–84. doi:10.1111/j.1360-0443.2007.02119.x  
25  
26  
27 40 Bullen C, Howe C, Laugesen M, *et al.* Electronic cigarettes for smoking cessation: a randomised  
28 controlled trial. *Lancet* 2013;**382**:1629–37. doi:10.1016/S0140-6736(13)61842-5  
29  
30  
31  
32 41 Hughes JR, Keely J, Naud S. Shape of the relapse curve and long-term abstinence among untreated  
33 smokers. *Addiction* 2004;**99**:29–38.  
34  
35  
36 42 Chaiton M, Diemert L, Cohen JE, *et al.* Estimating the number of quit attempts it takes to quit  
37 smoking successfully in a longitudinal cohort of smokers. *BMJ Open* 2016;**6**:e011045.  
38  
39  
40  
41  
42  
43 43 Centers for Disease Control and Prevention. National Health Interview Survey. Adult tobacco use -  
44 major changes. [https://www.cdc.gov/nchs/nhis/tobacco/tobacco\\_changes.htm](https://www.cdc.gov/nchs/nhis/tobacco/tobacco_changes.htm) (accessed 6 Jun  
45  
46  
47  
48  
49 2019).  
50 44 Blewett LA, Rivera Drew JA, Griffin R, *et al.* *IPUMS Health Surveys: National Health Interview Survey,*  
51  
52  
53  
54  
55  
56  
57  
58  
59  
60

- 1  
2  
3 45 Borland R, Partos TR, Yong H-H, *et al*. How much unsuccessful quitting activity is going on among  
4  
5 adult smokers? Data from the International Tobacco Control Four Country cohort survey. *Addiction*  
6  
7 2012;**107**:673–82. doi:10.1111/j.1360-0443.2011.03685.x  
8  
9  
10 46 Jones JM. Smoking habits stable; most would like to quit. 18 Jul 2006. Gallup.com.  
11  
12 <https://news.gallup.com/poll/23791/Smoking-Habits-Stable-Most-Would-Like-Quit.aspx> (accessed 6  
13  
14 Jun 2019).  
15  
16 47 Warner KE, Mendez D. E-cigarettes: comparing the possible risks of increasing smoking initiation  
17  
18 with the potential benefits of increasing smoking cessation. *Nicotine Tob Res* 2019;**21**:41–7.  
19  
20 doi:10.1093/ntr/nty062  
21  
22  
23 48 Feuer EJ, Levy DT, McCarthy WJ. Chapter 1: The impact of the reduction in tobacco smoking on U.S.  
24  
25 lung cancer mortality, 1975–2000: an introduction to the problem. *Risk Analysis* 2012;**32**:S6–13.  
26  
27 doi:10.1111/j.1539-6924.2011.01745.x  
28  
29  
30 49 Hajek P, Phillips-Waller A, Przulj D, *et al*. A randomized trial of e-cigarettes versus nicotine-  
31  
32 replacement therapy. *N Engl J Med* 2019;**380**:629–37. doi:10.1056/NEJMoa1808779  
33  
34  
35 50 Population Assessment of Tobacco and Health (PATH).  
36  
37 <https://pathstudyinfo.nih.gov/UI/HomeMobile.aspx> (accessed 6 Jun 2019).  
38  
39 51 Paltiel AD, Weinstein MC, Kimmel AD, *et al*. Expanded screening for HIV in the United States--an  
40  
41 analysis of cost-effectiveness. *N Engl J Med* 2005;**352**:586–95. doi:10.1056/NEJMsa042088  
42  
43  
44 52 Sanders GD, Bayoumi AM, Sundaram V, *et al*. Cost-effectiveness of screening for HIV in the era of  
45  
46 highly active antiretroviral therapy. *N Engl J Med* 2005;**352**:570–85. doi:10.1056/NEJMsa042657  
47  
48  
49 53 Dugdale CM, Ciaranello AL, Bekker L-G, *et al*. Risks and benefits of dolutegravir- and efavirenz-based  
50  
51 strategies for South African women with HIV of child-bearing potential: a modeling study. *Ann*  
52  
53 *Intern Med* Published Online First: 2 April 2019. doi:10.7326/M18-3358  
54  
55  
56  
57  
58  
59  
60



- 1  
2  
3 54 Phillips AN, Venter F, Havlir D, *et al*. Risks and benefits of dolutegravir-based antiretroviral drug  
4 regimens in sub-Saharan Africa: a modelling study. *Lancet HIV* 2019;**6**:e116–27. doi:10.1016/S2352-  
5  
6 3018(18)30317-5  
7  
8  
9  
10 55 Berry DA, Cronin KA, Plevritis SK, *et al*. Effect of screening and adjuvant therapy on mortality from  
11 breast cancer. *N Engl J Med* 2005;**353**:1784–92. doi:10.1056/NEJMoa050518  
12  
13  
14 56 Hughes JR, Solomon LJ, Naud S, *et al*. Natural history of attempts to stop smoking. *Nicotine Tob Res*  
15 2014;**16**:1190–8. doi:10.1093/ntr/ntu052  
16  
17  
18 57 Herd N, Borland R, Hyland A. Predictors of smoking relapse by duration of abstinence: findings from  
19 the International Tobacco Control (ITC) Four Country Survey. *Addiction* 2009;**104**:2088–99.  
20  
21 doi:10.1111/j.1360-0443.2009.02732.x  
22  
23  
24 58 Herd N, Borland R. The natural history of quitting smoking: findings from the International Tobacco  
25 Control (ITC) Four Country Survey. *Addiction* 2009;**104**:2075–87. doi:10.1111/j.1360-  
26  
27 0443.2009.02731.x  
28  
29  
30  
31 59 National Institute on Drug Abuse. The science of drug use and addiction: the basics.  
32  
33 <https://www.drugabuse.gov/publications/media-guide/science-drug-use-addiction-basics> (accessed  
34  
35 3 Jun 2019).  
36  
37  
38 60 Babb S, Malarcher A, Schauer G, *et al*. Quitting smoking among adults - United States, 2000-2015.  
39  
40 *MMWR Morb Mortal Wkly Rep* 2017;**65**:1457–64. doi:10.15585/mmwr.mm6552a1  
41  
42  
43 61 Garrett BE, Dube SR, Trosclair A, *et al*. Cigarette smoking - United States, 1965-2008. *MMWR Suppl*  
44  
45 2011;**60**:109–13.  
46  
47  
48 62 Bosdriesz JR, Lichthart N, Witvliet MI, *et al*. Smoking prevalence among migrants in the US  
49 compared to the US-born and the population in countries of origin. *PLoS One* 2013;**8**:e58654.  
50  
51 doi:10.1371/journal.pone.0058654  
52  
53  
54  
55  
56  
57  
58  
59  
60

- 1  
2  
3 63 Pampel F, Khlal M, Bricard D, *et al*. Smoking among immigrant groups in the United States:  
4 prevalence, education gradients, and male-to-female ratios. *Nicotine Tob Res* Published Online First:  
5 13 February 2019. doi:10.1093/ntr/ntz022  
6  
7  
8  
9  
10 64 GBD 2015 Tobacco Collaborators. Smoking prevalence and attributable disease burden in 195  
11 countries and territories, 1990-2015: a systematic analysis from the Global Burden of Disease Study  
12 2015. *Lancet* 2017;**389**:1885–906. doi:10.1016/S0140-6736(17)30819-X  
13  
14  
15  
16  
17  
18  
19  
20  
21  
22  
23  
24  
25  
26  
27  
28  
29  
30  
31  
32  
33  
34  
35  
36  
37  
38  
39  
40  
41  
42  
43  
44  
45  
46  
47  
48  
49  
50  
51  
52  
53  
54  
55  
56  
57  
58  
59  
60

## FIGURE LEGENDS

### **Figure 1. Overview of tobacco use states and transitions in Simulating Tobacco and Nicotine Outcomes and Policy (STOP) microsimulation model.**

This is a simplified, stylized depiction of smoking states and transitions – for example, dimensions such as age and sex are not represented in the figure. The ovals represent possible cigarette smoking states or the deceased state. The arrows represent monthly transitions by which an individual can switch to a different state. The “Abstinence, sustained” transition is depicted by a dashed line because there is not a monthly probability of transition – instead, the transition occurs after an individual has spent a user-defined duration (e.g., one year) in the “Smoker who recently stopped” state. Numerical examples of the transition probabilities are in supplementary table 1.

### **Figure 2. Internal validation and calibration exercise: STOP-generated results and CISNET-generated results for current smoking prevalence over time for US people born in 1950.**

STOP: Simulating Tobacco and Nicotine Outcomes and Policy model. CISNET: Cancer Intervention and Surveillance Modeling Network.

Panel A depicts women, Panel B depicts men. The red dotted line shows results from the CISNET model. The other three lines show STOP-generated results after each step of our parameterization and calibration process. The blue line includes parameterization of smoking initiation and cessation, but not relapse. The pink dashed line includes smoking relapse as based on published studies. The black line includes calibration of smoking cessation probabilities to reflect quit attempts and relapse before sustained abstinence.

1  
2  
3 **Figure 3. External validation: STOP model results and NHIS/NDI results for cumulative mortality of**  
4 **current smokers and never smokers from age 20.**  
5

6  
7 STOP: Simulating Tobacco and Nicotine Outcomes and Policy. NHIS: National Health Interview Survey.  
8

9  
10 NDI: National Death Index. CV-RMSE: coefficient of variation of root-mean-square error.  
11

12  
13  
14 Panel A depicts women, Panel B depicts men. Within each panel, the STOP results and the NHIS data are  
15  
16 not easily distinguishable because they are essentially overlapping. Current smokers are those who  
17  
18 continue to smoke until death. NHIS was linked to NDI for mortality data.  
19  
20  
21  
22  
23  
24  
25  
26  
27  
28  
29  
30  
31  
32  
33  
34  
35  
36  
37  
38  
39  
40  
41  
42  
43  
44  
45  
46  
47  
48  
49  
50  
51  
52  
53  
54  
55  
56  
57  
58  
59  
60

Figure 1

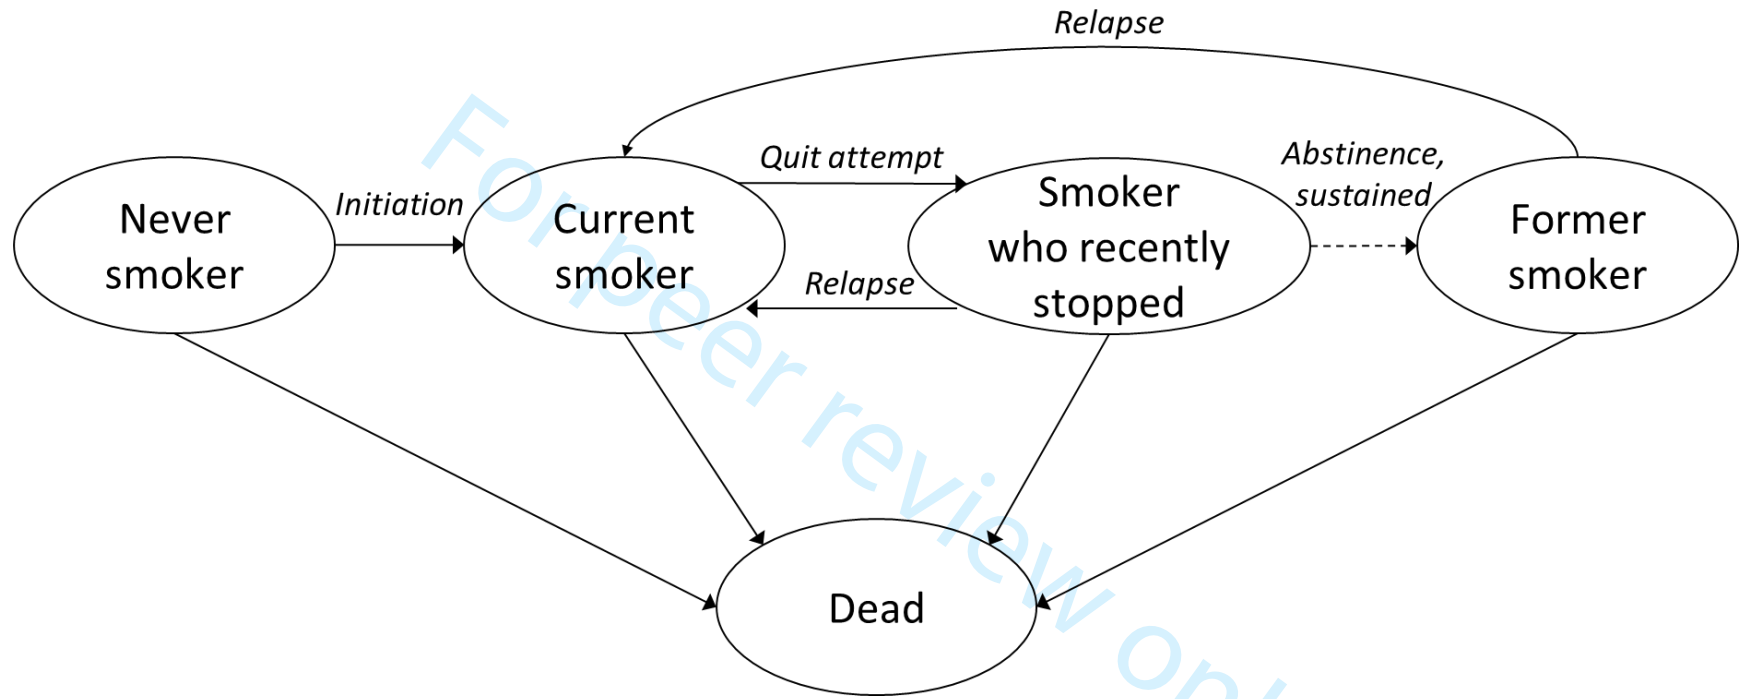

Figure 2

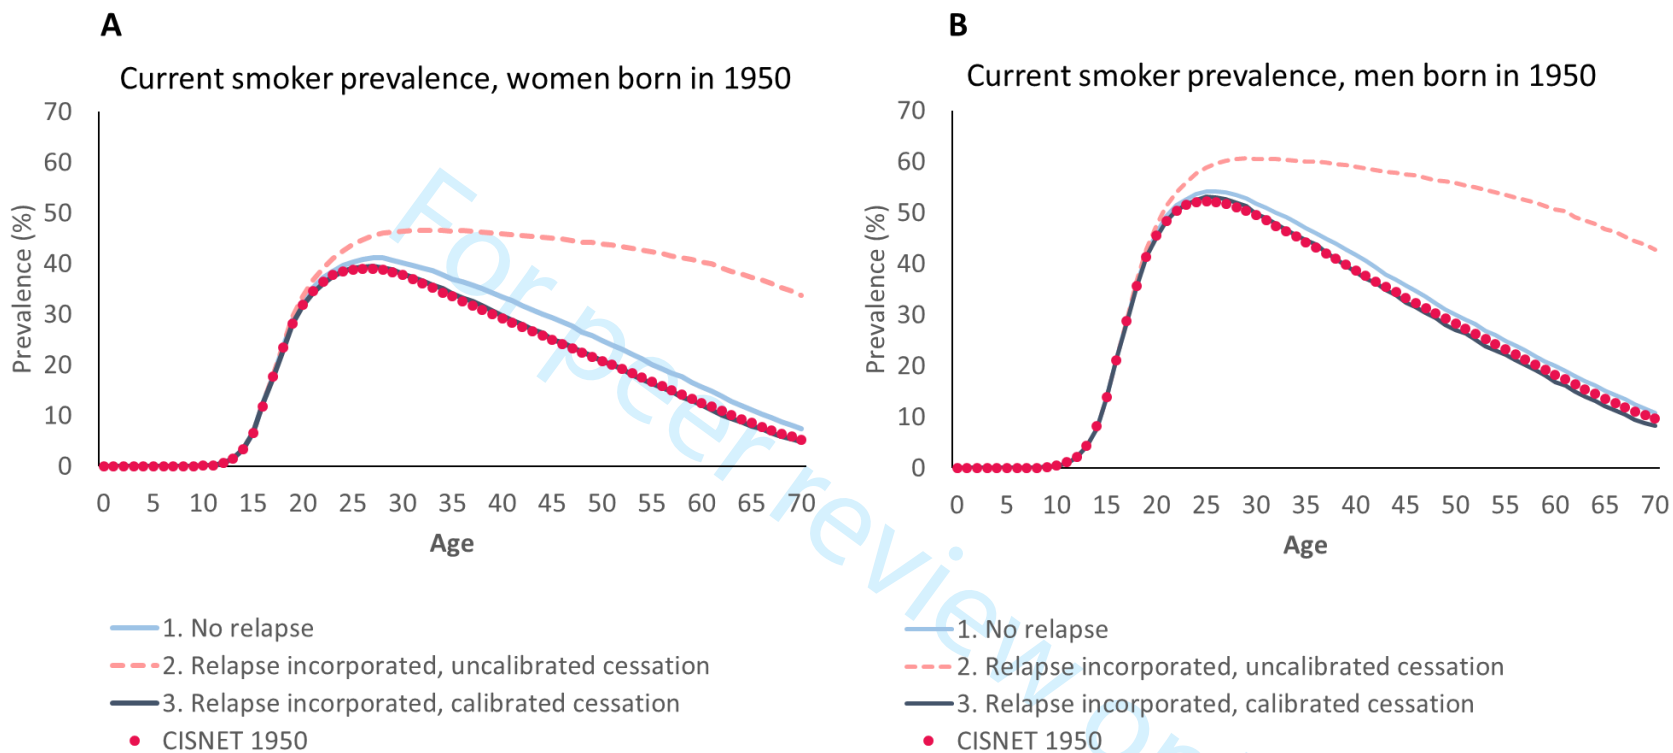

Figure 3

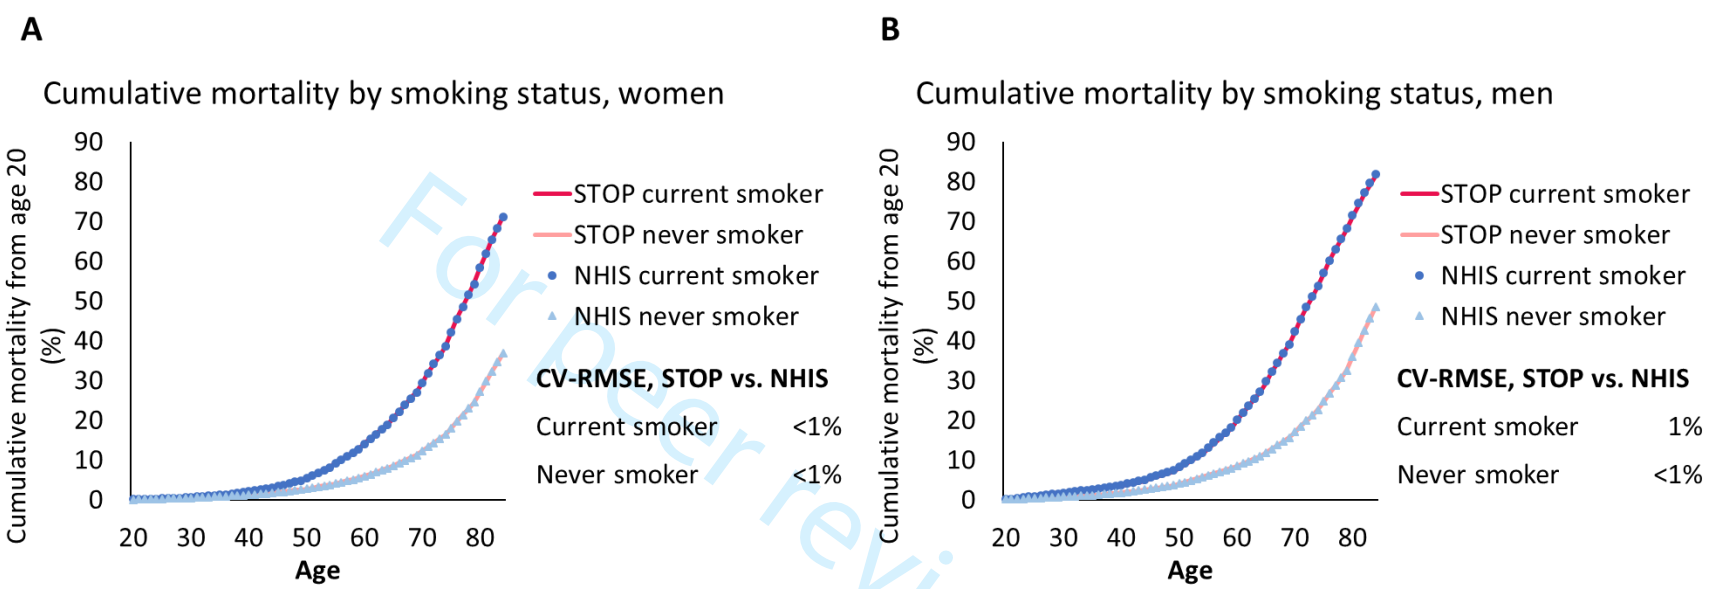

**A novel microsimulation model of tobacco use behaviors and outcomes****Supplement**

Krishna P. Reddy, Alexander J.B. Bulteel, Douglas E. Levy, Pamela Torola, Emily P. Hyle, Taige Hou,  
Benjamin Osher, Liyang Yu, Fatma M. Shebl, A. David Paltiel, Kenneth A. Freedberg, Milton C. Weinstein,  
Nancy A. Rigotti, Rochelle P. Walensky

**Table of Contents**

|                             |       |
|-----------------------------|-------|
| Methods: Supplementary Text | p. 2  |
| References                  | p. 6  |
| Supplementary Table 1       | p. 7  |
| Supplementary Table 2       | p. 9  |
| Supplementary Figure 1      | p. 10 |
| Supplementary Figure 2      | p. 11 |
| Supplementary Figure 3      | p. 12 |



## **METHODS: SUPPLEMENTARY TEXT**

### **CISNET Model**

The Cancer Intervention and Surveillance Modeling Network (CISNET) is a collaboration of National Cancer Institute-supported investigators modeling the impact of interventions on population incidence and mortality of various types of cancer, including lung cancer. The Yale CISNET-Lung models, for subsequent analyses of cancer care interventions, used data from the National Health Interview Survey (NHIS) to generate detailed smoking initiation and cessation rates, stratified by birth year, age, and sex, and mortality rates, stratified by birth year, age, sex, and smoking status.[1,2]

### **National Health Interview Survey (NHIS)**

NHIS is a yearly in-person questionnaire administered to the civilian noninstitutionalized population of the US which, since 1965, has collected information on individual smoking status. Since 1991, the smoking section of the NHIS has first queried “ever smoker” status – defined as having smoked at least 100 cigarettes in one’s lifetime – then asked ever smokers, “Do you NOW smoke cigarettes every day, some days or not at all?” which resulted in the classification of occasional smokers as current smokers, even though they initially may have said they did not smoke now. Regardless of response to the second question, participants were asked about the frequency of their smoking.[3]

### **Use of NHIS data in the Simulating Tobacco and Nicotine Outcomes and Policy (STOP) model**

We downloaded NHIS and linked National Death Index (NDI) data from the Integrated Public Use Microdata Series (IPUMS) Health Surveys for the years 1997-2009.[4] We obtained basic demographic information, smoking status and behavioral variables, and death status/year of death reported through 2011. For all derivations below, we excluded those with unknown smoking or mortality status. Only

1  
2  
3 people 18 years of age or older were surveyed about tobacco use, and since ages 85+ years are  
4  
5 censored, we excluded those as well.  
6  
7  
8  
9

#### 10 *External validation - mortality*

11  
12 From the pooled 1997-2009 data, we used the IPUMS-recoded and -constructed survey weights  
13  
14 adjusting for differential representation in the smoking sub-sample and NDI follow-up. Because of the  
15  
16 NHIS sampling design, weights must be used so that the survey respondents can be collectively  
17  
18 expanded to represent the civilian noninstitutionalized population of the US. These weights represent a  
19  
20 surveyed individual's inverse probability of being included in both the survey supplement, which  
21  
22 contains questions about smoking, and the NHIS-NDI linked mortality files.  
23  
24  
25  
26  
27

28 Smoking cessation inputs: We derived age- and sex-stratified cessation rates using the NHIS  
29  
30 variable that reported years since respondents (former smokers) quit smoking. We excluded  
31  
32 quit ages before age 16 years (due to perceived inconsistency of coding of the "time since quit"  
33  
34 variable – some entries implied negative quit age) and included quit ages through age 85 years.  
35  
36  
37  
38

39 Smoking initiation inputs: Similarly, we derived initiation rates, also age- and sex-stratified, using  
40  
41 the variable that reported years since the respondent (a current or former smoker) started to  
42  
43 smoke regularly. We used initiation rates from ages 6 to 61 years, the last age for which data are  
44  
45 consecutively available for both women and men.  
46  
47  
48  
49

50 Mortality inputs: We calculated mortality rates by age, sex, smoking status, and five-year age  
51  
52 group using the smoking status variable and NDI reporting through 2011. The rates were  
53  
54  
55  
56  
57

1  
2  
3 calculated from a follow-up period beginning in the respondent's survey year and ending in  
4  
5 2011 or the year of her/his death, whichever came first.  
6  
7  
8  
9

10 Input cohort: We derived initial cohort characteristics for this analysis from the NHIS 1997-2009  
11  
12 pooled dataset: current, former and never smoking prevalence by five-year age group from age  
13  
14 <20 to 84 years; mean (standard deviation [SD]) age adjusted for bounding of the distribution;  
15  
16 sex distribution; and mean (SD) time since quit bounded by a minimum quit age of 16 years.  
17  
18  
19  
20

21 Output comparison: We compared STOP model output for mortality to NHIS/NDI-reported  
22  
23 mortality in the form of mortality rates and cumulative mortality from age 20 years.  
24  
25  
26  
27

#### 28 *External validation – smoking prevalence*

29  
30 From the NHIS 1997 data, using the same survey weights as above:  
31  
32  
33

34 Smoking cessation, smoking initiation, and mortality inputs: We used the same cessation,  
35  
36 initiation, and mortality rate inputs as for the mortality validation.  
37  
38  
39  
40

41 Input cohort: We derived input cohort characteristics for this analysis from the 1997 NHIS data:  
42  
43 current, former, and never smoking prevalence by five-year age group from age <20 to 84 years;  
44  
45 mean (SD) age adjusted for bounding of the distribution; sex distribution; and mean (SD) time  
46  
47 since quit bounded by a minimum quit age of 16 years.  
48  
49  
50  
51  
52  
53  
54  
55  
56  
57

1  
2  
3 Output comparison: Starting with the 1997 NHIS respondents and following them each year  
4  
5 from 1998 to 2009, we compared STOP projections to NHIS data regarding prevalence of  
6  
7 current, former, and never smokers by five-year age group from age 30 to 84 years.  
8  
9  
10  
11  
12  
13  
14  
15  
16  
17  
18  
19  
20  
21  
22  
23  
24  
25  
26  
27  
28  
29  
30  
31  
32  
33  
34  
35  
36  
37  
38  
39  
40  
41  
42  
43  
44  
45  
46  
47  
48  
49  
50  
51  
52  
53  
54  
55  
56  
57  
58  
59  
60

For peer review only

## REFERENCES IN SUPPLEMENT

- 1 Holford TR, Meza R, Warner KE, *et al.* Tobacco control and the reduction in smoking-related premature deaths in the United States, 1964-2012. *JAMA* 2014;**311**:164–71. doi:10.1001/jama.2013.285112
- 2 Holford TR, Levy DT, McKay LA, *et al.* Patterns of birth cohort-specific smoking histories, 1965-2009. *Am J Prev Med* 2014;**46**:e31-37. doi:10.1016/j.amepre.2013.10.022
- 3 Centers for Disease Control and Prevention. National Health Interview Survey. Adult tobacco use - major changes. [https://www.cdc.gov/nchs/nhis/tobacco/tobacco\\_changes.htm](https://www.cdc.gov/nchs/nhis/tobacco/tobacco_changes.htm) (accessed 6 Jun 2019).
- 4 Blewett LA, Rivera Drew JA, Griffin R, *et al.* *IPUMS Health Surveys: National Health Interview Survey, Version 6.3 [dataset]*. Minneapolis, MN: IPUMS. <https://nhis.ipums.org> (accessed 20 Jun 2019).
- 5 Tonstad S, Tønnesen P, Hajek P, *et al.* Effect of maintenance therapy with varenicline on smoking cessation: a randomized controlled trial. *JAMA* 2006;**296**:64–71. doi:10.1001/jama.296.1.64
- 6 Brendryen H, Kraft P. Happy Ending: a randomized controlled trial of a digital multi-media smoking cessation intervention. *Addiction* 2008;**103**:478–84. doi:10.1111/j.1360-0443.2007.02119.x
- 7 Bullen C, Howe C, Laugesen M, *et al.* Electronic cigarettes for smoking cessation: a randomised controlled trial. *Lancet* 2013;**382**:1629–37. doi:10.1016/S0140-6736(13)61842-5
- 8 Hughes JR, Keely J, Naud S. Shape of the relapse curve and long-term abstinence among untreated smokers. *Addiction* 2004;**99**:29–38.

**Supplementary Table 1. Examples of transition probabilities in the simulation model.**

| Parameter                                                                                                                   | Value                                       | Reference                               |
|-----------------------------------------------------------------------------------------------------------------------------|---------------------------------------------|-----------------------------------------|
| Smoking initiation probability,<br>monthly, by age and sex                                                                  | 0-0.0063                                    | Derived from NHIS<br>1997-2009 data     |
| Cessation probability, monthly,<br>by age and sex                                                                           | 0-0.035                                     | Derived from NHIS<br>1997-2009 data     |
| Relapse probability, monthly,<br>by time since cessation                                                                    | $P_{\text{Relapse}} = 0.62 * e^{-0.33 * t}$ | [5–8]                                   |
| Never smoker mortality probability,<br>monthly, by age and sex, x 10 <sup>-4</sup>                                          | 0.4-95.2                                    | Derived from NHIS/NDI<br>1997-2009 data |
| Current smoker or recently quit<br>smoker mortality probability,<br>monthly, by age and sex, x 10 <sup>-4</sup>             | 0.4-136.1                                   | Derived from NHIS/NDI<br>1997-2009 data |
| Former smoker mortality<br>probability, monthly, by age, sex,<br>and time since cessation <sup>a</sup> , x 10 <sup>-4</sup> | 0-111.5                                     | Derived from NHIS/NDI<br>1997-2009 data |
| Time to transition from “recently<br>stopped” to “former smoker”                                                            | 5 years                                     | Assumption                              |

NHIS: National Health Interview Survey. NDI: National Death Index. STOP: Simulating Tobacco and Nicotine Outcomes and Policy.

<sup>a</sup>These former smoker mortality probabilities were used only in the external validation exercises, comparing STOP model output to NHIS/NDI results. In internal validation comparing STOP model output

1  
2  
3  
4  
5  
6  
7  
8  
9  
10  
11  
12  
13  
14  
15  
16  
17  
18  
19  
20  
21  
22  
23  
24  
25  
26  
27  
28  
29  
30  
31  
32  
33  
34  
35  
36  
37  
38  
39  
40  
41  
42  
43  
44  
45  
46  
47  
48  
49  
50  
51  
52  
53  
54  
55  
56  
57  
58  
59  
60

to the CISNET model results, we applied multipliers to never smoker mortality rates to derive former smoker mortality rates and then converted these to probabilities.

For peer review only

**Supplementary Table 2. Selected age- and sex-specific annual mortality rates: STOP model output versus NHIS-derived mortality.**

| <b>Women</b>            |                |          |               |          |              |          |
|-------------------------|----------------|----------|---------------|----------|--------------|----------|
|                         | Current smoker |          | Former smoker |          | Never smoker |          |
| <b>Age group, years</b> | STOP           | NHIS/NDI | STOP          | NHIS/NDI | STOP         | NHIS/NDI |
| 40-44                   | 0.0023         | 0.0023   | 0.0017        | 0.0015   | 0.0012       | 0.0012   |
| 50-54                   | 0.0071         | 0.0071   | 0.0035        | 0.0029   | 0.0025       | 0.0025   |
| 60-64                   | 0.0147         | 0.0146   | 0.0087        | 0.0079   | 0.0051       | 0.0051   |
| <b>Men</b>              |                |          |               |          |              |          |
|                         | Current smoker |          | Former smoker |          | Never smoker |          |
| <b>Age group, years</b> | STOP           | NHIS/NDI | STOP          | NHIS/NDI | STOP         | NHIS/NDI |
| 40-44                   | 0.0031         | 0.0034   | 0.0028        | 0.0025   | 0.0018       | 0.0018   |
| 50-54                   | 0.0094         | 0.0096   | 0.0059        | 0.0053   | 0.0042       | 0.0043   |
| 60-64                   | 0.0233         | 0.0232   | 0.0114        | 0.0099   | 0.0067       | 0.0066   |

STOP: Simulating Tobacco and Nicotine Outcomes and Policy. NHIS: National Health Interview Survey.

NDI: National Death Index.



1 **Supplementary Figure 1. Smoking status by age group and sex in 1997: STOP model inputs for the external validation exercise of smoking**  
 2 **prevalence.**

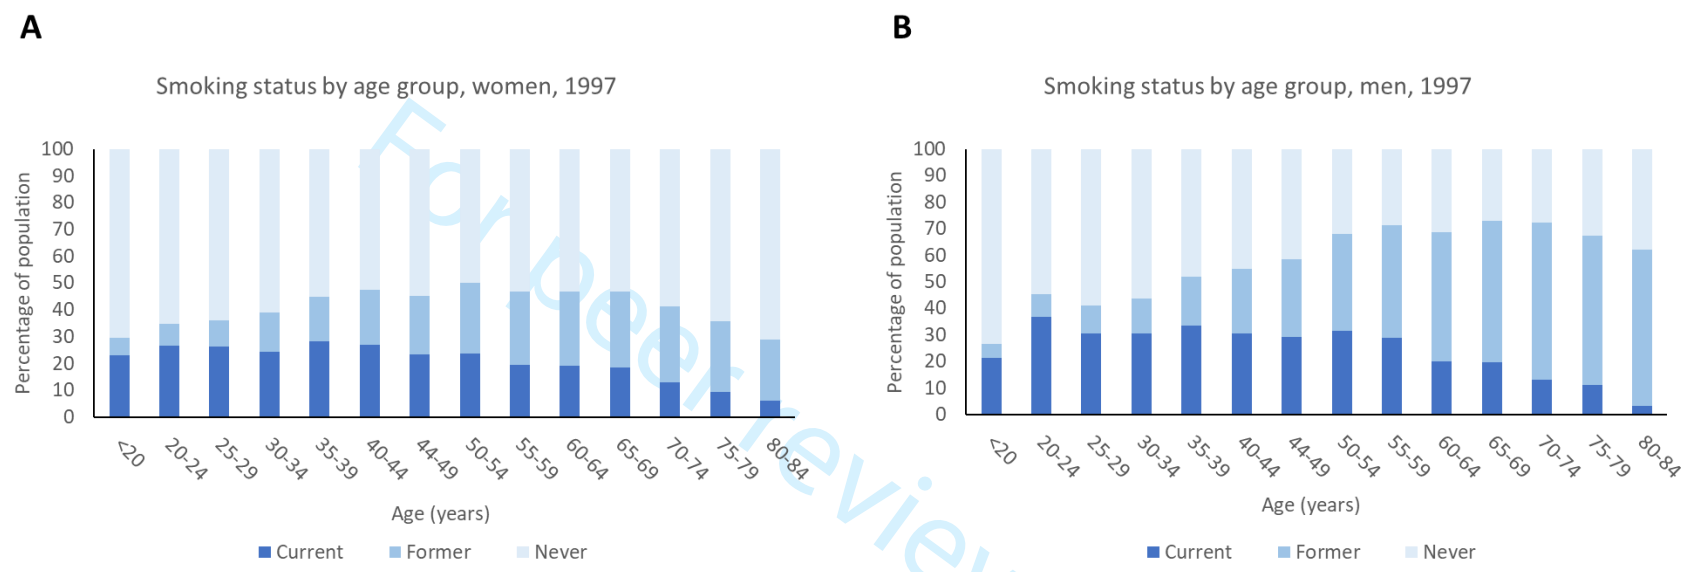

3 STOP: Simulating Tobacco and Nicotine Outcomes and Policy. NHIS: National Health Interview Survey.

4

5

6 Panel A depicts women; Panel B depicts men. For each age group, the prevalence of current, former, and never smokers is entered as STOP

7 model input. The external validation analysis of smoking prevalence, using weighted NHIS 1997 survey respondent data as inputs, projects

8 smoking prevalence annually from 1998 to 2009.

10 **Supplementary Figure 2. External validation: STOP model results and NHIS results for prevalence of current, former, and never smokers each**  
 11 **year from 1998 to 2009.**

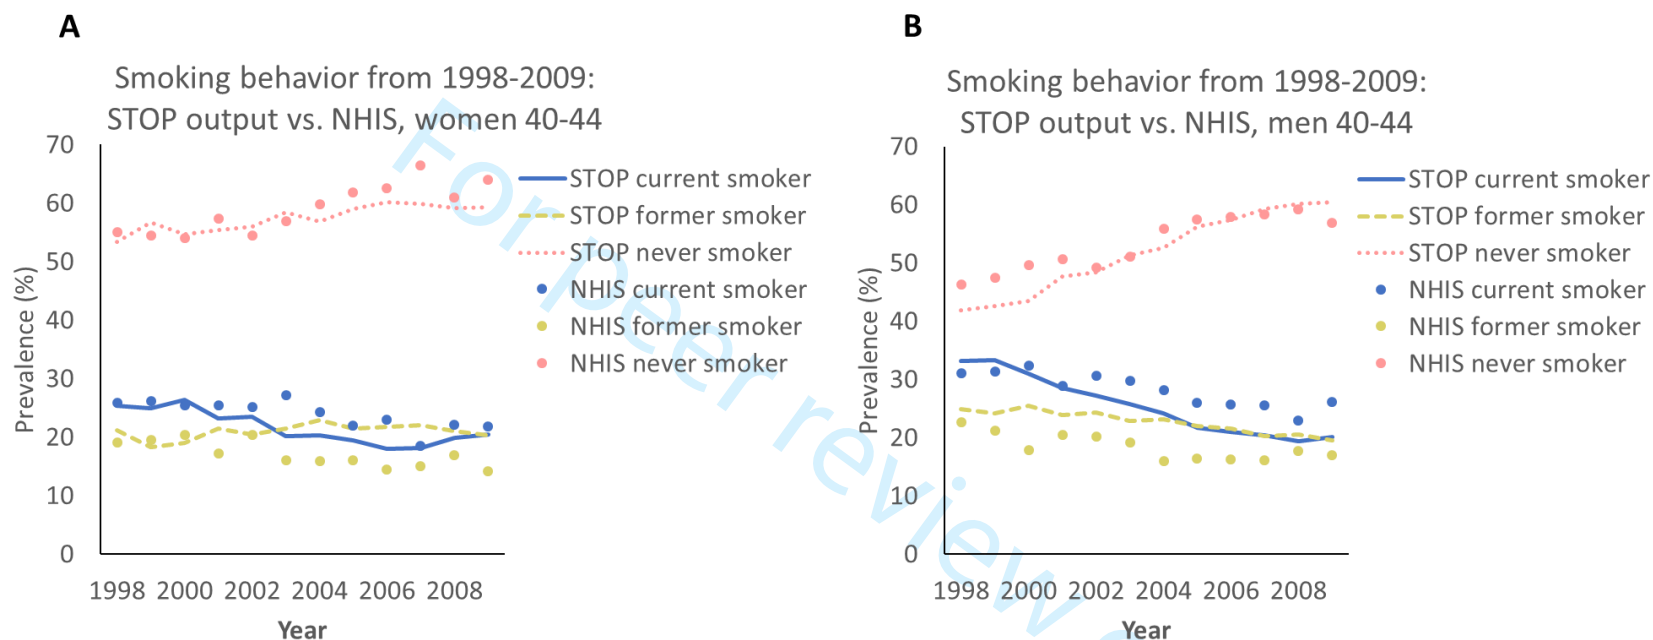

12  
 13 STOP: Simulating Tobacco and Nicotine Outcomes and Policy. NHIS: National Health Interview Survey. NDI: National Death Index.

14  
 15 Panel A depicts women, Panel B depicts men. The STOP model cohort had the age and smoking status distribution of the 1997 NHIS survey  
 16 respondents (Supplementary Figure 1). The STOP-generated results reflect a microsimulation that included probabilities of smoking initiation,  
 17 smoking cessation, smoking relapse, and mortality.

18 **Supplementary Figure 3. Two-way sensitivity analysis of smoking initiation and smoking cessation multipliers for external validation exercise.**

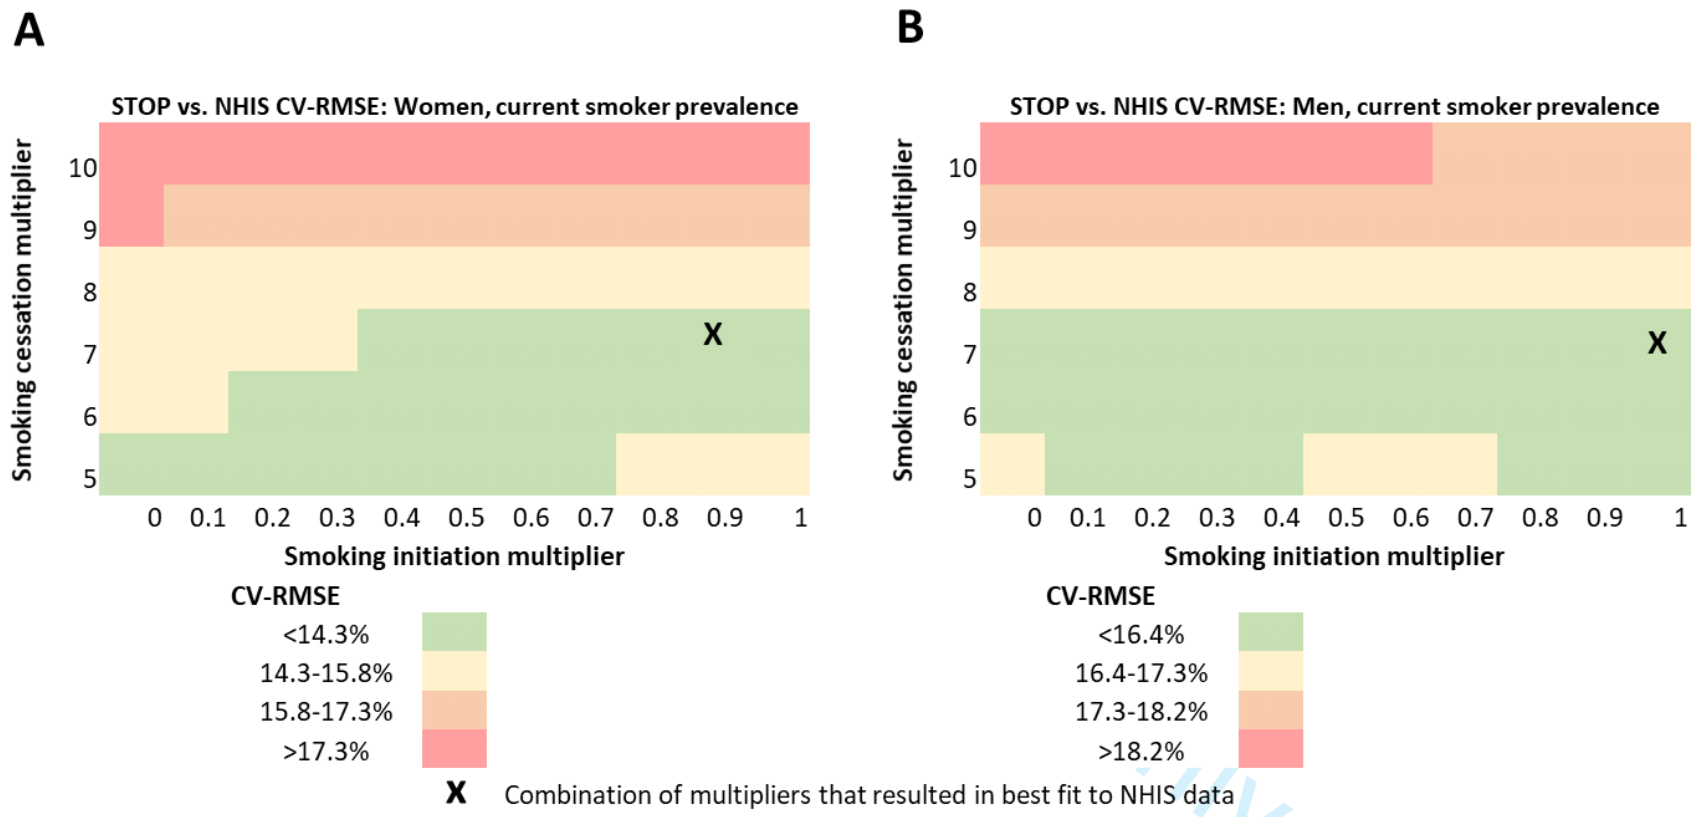

19

20 STOP: Simulating Tobacco and Nicotine Outcomes and Policy. NHIS: National Health Interview Survey. CV-RMSE: coefficient of variation of root-

21 mean-square error.

1  
2  
3 23 Panel A depicts women; Panel B depicts men. The multipliers were applied to the original cessation and initiation rates derived from pooled  
4  
5 24 1997-2009 NHIS data and used in the STOP model. The horizontal axis shows the multiplier applied to smoking initiation rates (subsequently  
6  
7  
8 25 converted to probabilities) in the STOP model, and the vertical axis shows the multiplier applied to smoking cessation rates (subsequently  
9  
10 26 converted to probabilities). Colored cells represent the CV-RMSE of STOP model-generated versus NHIS-reported current smoking prevalence  
11  
12 27 among people ages 30-84 years from 1998 to 2009.  
13  
14  
15  
16  
17  
18  
19  
20  
21  
22  
23  
24  
25  
26  
27  
28  
29  
30  
31  
32  
33  
34  
35  
36  
37  
38  
39  
40  
41  
42  
43  
44  
45  
46  
47

# BMJ Open

## A novel microsimulation model of tobacco use behaviors and outcomes: calibration and validation in a US population

|                                 |                                                                                                                                                                                                                                                                                                                                                                                                                                                                                                                                                                                                                                                                                                                                                                                                                                                                                                                                                                                                                                                                                                                                     |
|---------------------------------|-------------------------------------------------------------------------------------------------------------------------------------------------------------------------------------------------------------------------------------------------------------------------------------------------------------------------------------------------------------------------------------------------------------------------------------------------------------------------------------------------------------------------------------------------------------------------------------------------------------------------------------------------------------------------------------------------------------------------------------------------------------------------------------------------------------------------------------------------------------------------------------------------------------------------------------------------------------------------------------------------------------------------------------------------------------------------------------------------------------------------------------|
| Journal:                        | <i>BMJ Open</i>                                                                                                                                                                                                                                                                                                                                                                                                                                                                                                                                                                                                                                                                                                                                                                                                                                                                                                                                                                                                                                                                                                                     |
| Manuscript ID                   | bmjopen-2019-032579.R1                                                                                                                                                                                                                                                                                                                                                                                                                                                                                                                                                                                                                                                                                                                                                                                                                                                                                                                                                                                                                                                                                                              |
| Article Type:                   | Original research                                                                                                                                                                                                                                                                                                                                                                                                                                                                                                                                                                                                                                                                                                                                                                                                                                                                                                                                                                                                                                                                                                                   |
| Date Submitted by the Author:   | 03-Feb-2020                                                                                                                                                                                                                                                                                                                                                                                                                                                                                                                                                                                                                                                                                                                                                                                                                                                                                                                                                                                                                                                                                                                         |
| Complete List of Authors:       | Reddy, Krishna; Massachusetts General Hospital, Medical Practice Evaluation Center<br>Bulteel, Alexander; Massachusetts General Hospital, Medical Practice Evaluation Center<br>Levy, Douglas; Massachusetts General Hospital<br>Torola, Pamela; Massachusetts General Hospital, Medical Practice Evaluation Center<br>Hyle, Emily; Massachusetts General Hospital, Medical Practice Evaluation Center<br>Hou, Taige; Massachusetts General Hospital, Medical Practice Evaluation Center<br>Osher, Benjamin; Massachusetts General Hospital, Medical Practice Evaluation Center<br>Yu, Liyang; Massachusetts General Hospital, Medical Practice Evaluation Center<br>Shebl, Fatma; Massachusetts General Hospital, Medical Practice Evaluation Center<br>Paltiel, A David; Yale University School of Public Health<br>Freedberg, Kenneth; Massachusetts General Hospital, Medical Practice Evaluation Center<br>Weinstein, Milton ; Harvard University T H Chan School of Public Health<br>Rigotti, Nancy; Massachusetts General Hospital<br>Walensky, Rochelle; Massachusetts General Hospital, Medical Practice Evaluation Center |
| <b>Primary Subject Heading</b>: | Public health                                                                                                                                                                                                                                                                                                                                                                                                                                                                                                                                                                                                                                                                                                                                                                                                                                                                                                                                                                                                                                                                                                                       |
| Secondary Subject Heading:      | Addiction, Epidemiology, Health policy, Health services research, Research methods                                                                                                                                                                                                                                                                                                                                                                                                                                                                                                                                                                                                                                                                                                                                                                                                                                                                                                                                                                                                                                                  |
| Keywords:                       | tobacco, nicotine, model, validation, calibration, relapse                                                                                                                                                                                                                                                                                                                                                                                                                                                                                                                                                                                                                                                                                                                                                                                                                                                                                                                                                                                                                                                                          |
|                                 |                                                                                                                                                                                                                                                                                                                                                                                                                                                                                                                                                                                                                                                                                                                                                                                                                                                                                                                                                                                                                                                                                                                                     |

SCHOLARONE™  
Manuscripts



I, the Submitting Author has the right to grant and does grant on behalf of all authors of the Work (as defined in the below author licence), an exclusive licence and/or a non-exclusive licence for contributions from authors who are: i) UK Crown employees; ii) where BMJ has agreed a CC-BY licence shall apply, and/or iii) in accordance with the terms applicable for US Federal Government officers or employees acting as part of their official duties; on a worldwide, perpetual, irrevocable, royalty-free basis to BMJ Publishing Group Ltd ("BMJ") its licensees and where the relevant Journal is co-owned by BMJ to the co-owners of the Journal, to publish the Work in this journal and any other BMJ products and to exploit all rights, as set out in our [licence](#).

The Submitting Author accepts and understands that any supply made under these terms is made by BMJ to the Submitting Author unless you are acting as an employee on behalf of your employer or a postgraduate student of an affiliated institution which is paying any applicable article publishing charge ("APC") for Open Access articles. Where the Submitting Author wishes to make the Work available on an Open Access basis (and intends to pay the relevant APC), the terms of reuse of such Open Access shall be governed by a Creative Commons licence – details of these licences and which [Creative Commons](#) licence will apply to this Work are set out in our licence referred to above.

Other than as permitted in any relevant BMJ Author's Self Archiving Policies, I confirm this Work has not been accepted for publication elsewhere, is not being considered for publication elsewhere and does not duplicate material already published. I confirm all authors consent to publication of this Work and authorise the granting of this licence.

**A novel microsimulation model of tobacco use behaviors and outcomes:  
calibration and validation in a US population**

Krishna P. Reddy<sup>1,2,3,7,\*</sup>, Alexander J.B. Bulteel<sup>1</sup>, Douglas E. Levy<sup>2,4,7</sup>, Pamela Torola<sup>1</sup>, Emily P. Hyle<sup>1,6,7</sup>,  
Taige Hou<sup>1</sup>, Benjamin Osher<sup>1</sup>, Liyang Yu<sup>1</sup>, Fatma M. Shebl<sup>1,7</sup>, A. David Paltiel<sup>8</sup>,  
Kenneth A. Freedberg<sup>1,5,6,7,9</sup>, Milton C. Weinstein<sup>7,9</sup>, Nancy A. Rigotti<sup>2,5,7</sup>, Rochelle P. Walensky<sup>1,5,6,7</sup>

<sup>1</sup>Medical Practice Evaluation Center, <sup>2</sup>Tobacco Research and Treatment Center, <sup>3</sup>Division of Pulmonary and Critical Care Medicine, <sup>4</sup>Mongan Institute Health Policy Research Center, <sup>5</sup>Division of General Internal Medicine, and <sup>6</sup>Division of Infectious Diseases, Massachusetts General Hospital, Boston, MA, USA

<sup>7</sup>Harvard Medical School, Boston, MA, USA

<sup>8</sup>Yale School of Public Health, New Haven, CT, USA

<sup>9</sup>Department of Health Policy and Management, Harvard T.H. Chan School of Public Health, Boston, MA, USA

\*Corresponding author:

Krishna P. Reddy, MD, MS

Medical Practice Evaluation Center

Massachusetts General Hospital

100 Cambridge Street, Suite 1600

1  
2  
3  
4  
5  
6  
7  
8  
9  
10  
11  
12  
13  
14  
15  
16  
17  
18  
19  
20  
21  
22  
23  
24  
25  
26  
27  
28  
29  
30  
31  
32  
33  
34  
35  
36  
37  
38  
39  
40  
41  
42  
43  
44  
45  
46  
47  
48  
49  
50  
51  
52  
53  
54  
55  
56  
57  
58  
59  
60

Boston, MA 02114

USA

Email: kpreddy@mgh.harvard.edu

Phone: +1 617-726-1993

**ABSTRACT WORD COUNT: 290**

**MAIN TEXT WORD COUNT: 3987**

For peer review only



**ABSTRACT**

Background and Objective: Tobacco policymakers must consider how emerging products will change cigarette smoking behaviors and clinical outcomes. Our objective was to develop, calibrate, and validate a novel individual-level microsimulation model to project cigarette smoking behaviors and associated mortality risks. Unlike most tobacco models, our new model would explicitly include smoking relapse.

Methods: We developed the Simulation of Tobacco and Nicotine Outcomes and Policy (STOP) model, in which individuals transition monthly between tobacco use states (current, former, or never) depending on rates of initiation, cessation, and relapse. Simulated individuals face tobacco use-stratified mortality risks. For US women and men, we conducted cross-validation with a Cancer Intervention and Surveillance Modeling Network (CISNET) model. We then incorporated smoking relapse and calibrated cessation rates to reflect the difference between a transient quit attempt and sustained abstinence. We performed external validation with the National Health Interview Survey (NHIS) and the linked National Death Index. Comparisons were based on root-mean-square error (RMSE).

Results: In cross-validation, STOP-generated projections of current/former/never smoking prevalence fit CISNET-projected data well (coefficient of variation [CV]-RMSE  $\leq 15\%$ ). After incorporating smoking relapse, multiplying the CISNET-reported cessation rates for women/men by 7.75/7.25, to reflect the ratio of quit attempts to sustained abstinence, resulted in the best approximation to CISNET-reported smoking prevalence (CV-RMSE 2%/3%). In external validation using these new multipliers, STOP-generated cumulative mortality curves for 20-year-old current smokers and never smokers each had CV-RMSE  $\leq 1\%$  compared to NHIS. In simulating those surveyed by NHIS in 1997, the STOP-projected prevalence of current/former/never smokers annually (1998-2009) was similar to that reported by NHIS (CV-RMSE 12%).

1  
2  
3  
4  
5 Conclusions: The STOP model, with relapse included, performed well when validated to US smoking  
6 prevalence and mortality. STOP provides a flexible framework for policy-relevant analysis of tobacco and  
7 nicotine product use.  
8  
9  
10

11  
12  
13  
14 Keywords: tobacco, nicotine, model, validation, calibration, relapse  
15  
16  
17

### 18 **STRENGTHS AND LIMITATIONS OF THIS STUDY**

19

- 20  
21 • The STOP microsimulation model and our calibration and validation methods capture monthly  
22 individual-level tobacco use behaviors and outcomes, including relapse, a key factor in nicotine  
23 addiction.  
24  
25
- 26 • We validated STOP model results with those of another model and, in a partially dependent manner,  
27 with empirical data.  
28  
29
- 30 • We validated with multiple outcomes, including smoking prevalence and mortality.  
31  
32
- 33 • This analysis did not account for some aspects of heterogeneity in tobacco use behaviors.  
34  
35  
36  
37  
38  
39  
40  
41  
42  
43  
44  
45  
46  
47  
48  
49  
50  
51  
52  
53  
54  
55  
56  
57

## INTRODUCTION

In the US, tobacco smoking reduces life expectancy by over a decade and accounts for over \$200 billion in healthcare costs annually, approximately 9% of all healthcare costs in the country.[1,2] Though the prevalence of cigarette smoking among adults has decreased in the US, from 42% in 1965 to 14% in 2018, the decline has not been seen in all segments of society.[3,4] Meanwhile, tobacco treatment interventions, including behavioral therapy and pharmacotherapy, remain underutilized.[5] Novel tobacco and nicotine products raise many new clinical and policy questions.[6,7] Trial- and cohort-based data to fully inform these questions will not be available for many years. In the meantime, a timely way to address them is via modeling.

Simulation models provide a critical complement to more traditional research approaches.[8–14] Indeed, the Food and Drug Administration and the National Academies of Sciences, Engineering, and Medicine recently called for modeling studies to project the long-term effects, including both potential harms and benefits, of novel tobacco and nicotine products and regulatory policies to address them.[15,16] While multiple model-based studies of tobacco and nicotine products have been published,[17–25] most report aggregate trends, are focused at the population rather than individual level, and do not explicitly account for smoking relapse, a key component of the natural history and resource utilization of smoking cessation attempts. A current challenge of projecting longer-term clinical and economic outcomes of short-term tobacco cessation studies lies in capturing the many smoking quit attempts and relapses.[26,27] A new model that intentionally examines relapse would extend trial results by projecting outcomes beyond the time horizon of trials, when many relapses occur. Our objective was to develop, calibrate, and validate a novel, individual-level microsimulation model that directly addresses the mechanics of smoking initiation, cessation, and relapse, and the associated clinical

1  
2  
3  
4  
5  
6  
7  
8  
9  
10  
11  
12  
13  
14  
15  
16  
17  
18  
19  
20  
21  
22  
23  
24  
25  
26  
27  
28  
29  
30  
31  
32  
33  
34  
35  
36  
37  
38  
39  
40  
41  
42  
43  
44  
45  
46  
47  
48  
49  
50  
51  
52  
53  
54  
55  
56  
57  
58  
59  
60

outcomes. The intended applications of the model include projecting the downstream impact of clinical and public health policy decisions and informing the design of tobacco treatment trials.

For peer review only

## METHODS

### Analytic overview

We developed a microsimulation model of tobacco- and nicotine-related behaviors, clinical outcomes, and treatments: the Simulation of Tobacco and Nicotine Outcomes and Policy (STOP) model. In this analysis, we focused on cigarette smoking among US women and men to demonstrate that the STOP model, in simulating individuals' month-by-month smoking behaviors, can match historical smoking prevalence and mortality data. Our methods included: 1) performing internal validation to ensure the accuracy of the mathematical calculations; 2) conducting cross-validation with another model; 3) incorporating smoking relapse and then calibrating smoking cessation probabilities to reflect the difference between a quit attempt and sustained abstinence; and 4) using our new relapse parameters, performing external validation to compare model outputs for mortality and for prevalence of current, former, and never smokers over time to empirical data from the National Health Interview Survey (NHIS) (table 1).

**Table 1. Characteristics of cross-validation and external validation analyses for a new microsimulation model of smoking behaviors and outcomes.**

| Analysis                      | STOP-generated output of interest                                                           | Comparator                                                                                                 | Measure of goodness of fit |
|-------------------------------|---------------------------------------------------------------------------------------------|------------------------------------------------------------------------------------------------------------|----------------------------|
| Cross-validation <sup>a</sup> | 1950 birth cohort prevalence of never, current, and former smokers, ages 0-70 years, by sex | CISNET-modeled 1950 birth cohort prevalence of never, current, and former smokers, ages 0-70 years, by sex | RMSE                       |

1  
2  
3  
4  
5  
6  
7  
8  
9  
10  
11  
12  
13  
14  
15  
16  
17  
18  
19  
20  
21  
22  
23  
24  
25  
26  
27  
28  
29  
30  
31  
32  
33  
34  
35  
36  
37  
38  
39  
40  
41  
42  
43  
44  
45  
46  
47  
48  
49  
50  
51  
52  
53  
54  
55  
56  
57  
58  
59  
60

## Mortality rates of 1997-2009

|                                            |                                                                             |                                                                                  |                  |
|--------------------------------------------|-----------------------------------------------------------------------------|----------------------------------------------------------------------------------|------------------|
| External validation:<br>mortality          | Cumulative mortality by age,<br>sex, and smoking status                     | NHIS respondents by age, sex,<br>and smoking status, and<br>cumulative mortality | MAPE and<br>RMSE |
| External validation:<br>smoking prevalence | Prevalence of never, current,<br>and former smokers, annually,<br>1998-2009 | NHIS never, current, and<br>former smoking prevalence,<br>annually, 1998-2009    | RMSE             |

STOP: Simulation of Tobacco and Nicotine Outcomes and Policy model. CISNET: Cancer Intervention and Surveillance Monitoring Network. NHIS: National Health Interview Survey. RMSE: root-mean-square error. MAPE: mean absolute percentage error. <sup>a</sup>The initial cross-validation did not include smoking relapse. In the subsequent calibration step, we incorporated smoking relapse and calibrated cessation to achieve a good fit to the CISNET-modeled 1950 birth cohort prevalence of never, current, and former smokers.

Because there is no consensus criterion by which to compare model-generated results to surveillance data, expert guidance suggests choosing a criterion appropriate for the model structure and data sources.[28] Similar to methods used in validating other models, we chose root-mean-square error (RMSE, for cumulative risks and time-varying prevalence estimates) and mean absolute percentage error (MAPE, for mortality rates) to evaluate the goodness-of-fit between STOP model results and data sources.[28–34] We applied the coefficient of variation of RMSE (CV-RMSE) as a relative measure of error.

### Smoking definitions

Similar to NHIS and the Cancer Intervention and Surveillance Modeling Network (CISNET, which used NHIS data), we defined Never Smokers as those who had smoked <100 cigarettes in their lifetime.[35–37] Among others (ever smokers), NHIS defined current smokers as those who reported currently smoking every day or some days. NHIS considered ever smokers who reported no smoking at the time of interview to be former smokers, regardless of the duration of abstinence. CISNET considered former smokers to be those who had quit smoking at least two years prior to interview; those with a shorter period of abstinence were still considered current smokers.

To better distinguish relapse and mortality risks among those with short-term or long-term abstinence, the STOP model includes three states for those who have ever smoked: 1) Current Smoker; 2) Recent Quitter (short-term abstinence); 3) Former Smoker (long-term abstinence) (figure 1). This enables a differentiation between: 1) transient quit attempts: transition from the Current Smoker state to the Recent Quitter state, with a relatively high rate of early relapse back to the Current Smoker state; and 2) sustained abstinence: transition from the Recent Quitter state to the Former Smoker state, with a lower rate of later relapse back to the Current Smoker state.

### STOP model structure

STOP is an individual-level Monte Carlo microsimulation.[38,39] An individual enters the model with age and smoking status defined by random realizations from specified probability distributions. STOP follows a state-transition framework: individuals transition monthly through various cigarette smoking states (figure 1). Transitions between these states depend on age- and sex-stratified monthly smoking initiation and cessation probabilities. Ex-smokers have monthly relapse probabilities (figure 1). Monthly mortality probabilities depend on age, sex, and smoking status. Those who quit smoking retain the all-

1  
2  
3 cause mortality probabilities of current smokers until maintaining abstinence for a defined period of  
4  
5 time, after which the mortality probabilities decline.[1,8,40]  
6  
7  
8  
9

10 Individuals are simulated in series: for each simulated person, the model tracks smoking behavioral  
11  
12 events (smoking initiation, quit attempt, relapse) and the duration spent in each smoking state. Upon an  
13  
14 individual's death, the next simulated person enters the model. Once a cohort large enough to attain  
15  
16 stable estimates has been simulated, summary statistics are calculated, including mean number of quit  
17  
18 attempts, life expectancy, and the monthly prevalence of never, current, and former smokers. For the  
19  
20 purpose of model output displays, those in the Recent Quitter state are considered "former smokers."  
21  
22  
23 We use a constant simulated population size of one million to obtain stable estimates of these  
24  
25 "average" outcomes of interest.  
26  
27  
28  
29

### 30 **Internal validation**

31  
32 We conducted internal model validation by comparing model outputs to expected results and by  
33  
34 conducting sensitivity analysis.  
35  
36  
37  
38

### 39 **Cross-validation**

#### 40 *Overview and outcome comparisons*

41  
42 We conducted cross-validation by simulating the US population born in 1950, following them monthly  
43  
44 until 2020, and then comparing STOP results to those from CISNET modeling studies (table 1 and  
45  
46 supplementary text).[28] We selected the 1950 birth cohort because smoking prevalence in the US  
47  
48 peaked in the 1960s, which was the smoking initiation period (adolescence) for these individuals, and  
49  
50 data collection frequency increased concurrently. We compared STOP-generated results to CISNET-  
51  
52  
53  
54  
55  
56  
57  
58  
59  
60



1  
2  
3 reported results for the prevalence of female and male current, former, and never smokers over  
4  
5 time.[40]  
6  
7  
8  
9

10 We used CV-RMSE to assess the goodness-of-fit of the six sets of prevalence curves.[29,32] First, RMSE  
11  
12 was calculated as the square root of the average of the squared difference between STOP-projected  
13  
14 prevalence and CISNET-projected prevalence at each year of age. Then, we calculated CV-RMSE by  
15  
16 dividing RMSE by mean modeled prevalence, representing the relative error.  
17  
18  
19  
20

### 21 *CISNET Model*

22  
23 CISNET is a collaboration of National Cancer Institute-supported investigators modeling the impact of  
24  
25 interventions on population incidence and mortality of various types of cancer, including lung cancer.  
26  
27 The Yale CISNET-Lung models, for subsequent analyses of cancer care interventions, used data from  
28  
29 NHIS to generate detailed smoking initiation and cessation rates, stratified by birth year, age, and sex,  
30  
31 and mortality rates, stratified by birth year, age, sex, and smoking status.[37,41]  
32  
33  
34  
35  
36

### 37 *Input parameters for initial cross-validation*

38  
39 For the initial cross-validation exercise, we used data from CISNET modeling studies, which were derived  
40  
41 from NHIS through 2009 and were stratified by birth cohort (table 2).[37,41] Specifically, we used  
42  
43 CISNET age- and sex-stratified smoking initiation and cessation rates and smoking-stratified mortality  
44  
45 rates among US women and men born in 1950, converting them to monthly probabilities. The CISNET  
46  
47 smoking cessation rates reflected a direct transition from current smoker to former smoker after at least  
48  
49 two years of sustained abstinence.[41] This initial exercise used the same input parameters as CISNET  
50  
51 and did not include smoking relapse.  
52  
53  
54  
55  
56  
57  
58  
59  
60

**Table 2. STOP model input parameters applied in each validation exercise.**

| Input parameter                                                                                                                                                                 | Cross-validation            | External validation<br>of mortality | External validation<br>of smoking<br>prevalence |
|---------------------------------------------------------------------------------------------------------------------------------------------------------------------------------|-----------------------------|-------------------------------------|-------------------------------------------------|
| <b>Input parameters from CISNET (for cross-validation), NHIS 1997-2009 (for external validation of mortality), or NHIS 1997 (for external validation of smoking prevalence)</b> |                             |                                     |                                                 |
| Baseline cohort characteristics                                                                                                                                                 |                             |                                     |                                                 |
| Women/Men, % <sup>a</sup>                                                                                                                                                       | ---                         | 52/48                               | 52/48                                           |
| Initial age, mean, years (SD)                                                                                                                                                   | 0 (followed a birth cohort) | 39.7 (21.4)                         | 39.1 (20.7)                                     |
| Minimum/maximum age, years                                                                                                                                                      | ---                         | 18/84                               | 18/84                                           |
| Initial prevalence of                                                                                                                                                           |                             |                                     |                                                 |
| never/current/former smokers <sup>b</sup> , %                                                                                                                                   | 100/0/0                     | 56/22/22                            | 52/25/23                                        |
| Years since cessation among former smokers, mean (SD)                                                                                                                           | ---                         | 15.6 (12.7)                         | 14.4 (11.9)                                     |
| Smoking behavior events                                                                                                                                                         |                             |                                     |                                                 |
| Monthly smoking initiation probability, by age and sex                                                                                                                          | 0-0.0093                    | 0-0.0063                            | 0-0.0063                                        |
| Monthly smoking cessation probability, by age and sex                                                                                                                           | 0-0.015                     | 0-0.035                             | 0-0.035                                         |
| Mortality                                                                                                                                                                       |                             |                                     |                                                 |

|    |                                              |                    |           |           |
|----|----------------------------------------------|--------------------|-----------|-----------|
| 1  | Monthly mortality probability <sup>c</sup> , |                    |           |           |
| 2  | by age and sex, x 10 <sup>-4</sup>           |                    |           |           |
| 3  |                                              |                    |           |           |
| 4  | Never smokers                                | 0-12.8             | 0.4-95.2  | 0.4-95.2  |
| 5  |                                              |                    |           |           |
| 6  | Current smokers                              | 0-34.6             | 0.4-136.1 | 0.4-136.1 |
| 7  |                                              |                    |           |           |
| 8  |                                              | Multiplier applied |           |           |
| 9  | Former smokers                               | (see last row)     | 0-111.5   | 0-111.5   |
| 10 |                                              |                    |           |           |
| 11 |                                              |                    |           |           |
| 12 |                                              |                    |           |           |
| 13 |                                              |                    |           |           |
| 14 |                                              |                    |           |           |
| 15 |                                              |                    |           |           |

### Input parameters derived from smoking studies or from authors' calibration

|    |                                          |                                             |                                             |                                             |
|----|------------------------------------------|---------------------------------------------|---------------------------------------------|---------------------------------------------|
| 16 | Monthly relapse probability <sup>d</sup> |                                             |                                             |                                             |
| 17 | ( <i>t</i> = months since cessation)     | $P_{\text{Relapse}} = 0.62 * e^{-0.33 * t}$ | $P_{\text{Relapse}} = 0.62 * e^{-0.33 * t}$ | $P_{\text{Relapse}} = 0.62 * e^{-0.33 * t}$ |
| 18 |                                          |                                             |                                             |                                             |
| 19 | Cessation rate multiplier                |                                             |                                             |                                             |
| 20 | (calibrated), women/men                  | 7.75/7.25                                   | 7.75/7.25                                   | 7.5/7                                       |
| 21 |                                          |                                             |                                             |                                             |
| 22 | Initiation rate multiplier               |                                             |                                             |                                             |
| 23 | (calibrated), women/men                  | ---                                         | ---                                         | 0.9/1.0                                     |
| 24 |                                          |                                             |                                             |                                             |
| 25 | Former smoker mortality                  |                                             |                                             |                                             |
| 26 | multiplier, applied to never             |                                             |                                             |                                             |
| 27 | smoker mortality, by sex                 | 1.0-2.2                                     | ---                                         | ---                                         |
| 28 | and age at quit <sup>e</sup>             |                                             |                                             |                                             |
| 29 |                                          |                                             |                                             |                                             |
| 30 |                                          |                                             |                                             |                                             |
| 31 |                                          |                                             |                                             |                                             |
| 32 |                                          |                                             |                                             |                                             |
| 33 |                                          |                                             |                                             |                                             |
| 34 |                                          |                                             |                                             |                                             |
| 35 |                                          |                                             |                                             |                                             |
| 36 |                                          |                                             |                                             |                                             |
| 37 |                                          |                                             |                                             |                                             |
| 38 |                                          |                                             |                                             |                                             |
| 39 |                                          |                                             |                                             |                                             |
| 40 |                                          |                                             |                                             |                                             |

STOP: Simulation of Tobacco and Nicotine Outcomes and Policy. CISNET: Cancer Intervention and Surveillance Modeling Network. NHIS: National Health Interview Survey. SD: standard deviation. The numbers show model input parameters applied in cross-validation (left column), external validation of mortality (center column), and external validation of smoking prevalence (right column).

<sup>a</sup>In cross-validation, we simulated cohorts of either all women or all men from birth. Thus, no distributions of initial age are displayed.

<sup>b</sup>Prevalence of each smoking status displayed here is the mean over all strata, but in the model these were stratified by 5-year age group and sex from ages 18 to 84.

<sup>c</sup>Additional details about mortality data are in supplementary table 2.

<sup>d</sup>This is based on relapse probabilities reported in smoking cessation intervention trials, focusing on placebo arms.[42–45]

<sup>e</sup>For the 1950 birth cohort, some CISNET-derived former smoker mortality rates are lower than CISNET-derived never smoker mortality rates – a counterintuitive relationship otherwise unexplained. We therefore adapted former smoker mortality multipliers for the cross-validation from Thun et al.[40]

### *Incorporating smoking relapse and calibrating cessation probabilities*

The STOP model specifically includes smoking relapse, critical to projecting both short-term and long-term impacts of smoking cessation interventions and novel tobacco and nicotine products.

Following the initial cross-validation of the STOP model (without relapse), we added smoking relapse probabilities and then recalibrated the model by adjusting the previously-applied smoking cessation probabilities. First, we modeled relapse as an exponential decay function of time since quit, such that the highest risk of relapse was in the first month after a quit attempt. The coefficient and time constant are based on relapse probabilities in smoking cessation trials (table 2).[42–45] Second, we calibrated the previously-applied cessation probabilities (derived from CISNET cessation data) by a multiplier to reflect:

1  
2  
3 1) a quit attempt rather than sustained abstinence; and 2) the higher likelihood of making a quit attempt  
4 rather than attaining sustained abstinence in a given month. This multiplier represents the average  
5 number of quit attempts, lasting at least one month, prior to attaining sustained abstinence. We  
6 compared our multipliers to published data on the average number of quit attempts required to attain  
7 sustained abstinence.[27] Our overall aim for this calibration step was to identify a STOP-generated  
8 current smoker prevalence curve with an RMSE <0.01 compared to the CISNET model-generated current  
9 smoker prevalence curve, similar to previously described methods.[32]

## 21 External validation

### 23 *Overview and outcome comparisons*

24 For external validation, we compared STOP model results to NHIS data.[28,36] We accounted for  
25 smoking initiation, smoking cessation, and mortality. Because NHIS data do not explicitly report relapse,  
26 we incorporated smoking relapse and the best-fitting cessation multipliers found in the cross-validation  
27 calibration step. We compared two outcomes: mortality and smoking prevalence (table 1 and  
28 supplementary text).

29  
30 First, to project and validate mortality outcomes, we simulated the population surveyed by NHIS from  
31 1997 through 2009 (supplementary text). To compare STOP-generated mortality rates to those derived  
32 from NHIS – stratified by age, sex, and smoking status – we used MAPE, the mean absolute value of the  
33 percent difference between STOP and NHIS values. We also produced curves of cumulative mortality  
34 from STOP-generated results and from NHIS data, stratified by sex and by current/never smoking status.  
35 These curves reflect 20-year-old current smokers who continue to smoke until death or 20-year-old  
36 never smokers who never start smoking. We compared the four sets of cumulative mortality curves by  
37 RMSE and CV-RMSE (STOP versus NHIS) from age 20 years until age 84 years (goal RMSE <0.01). We did  
38  
39  
40  
41  
42  
43  
44  
45  
46  
47  
48  
49  
50  
51  
52  
53  
54  
55  
56  
57

1  
2  
3 not generate mortality curves for 20-year-old former smokers because mortality risks for those who  
4 stop smoking prior to age 20 are similar to those of never smokers.[1] Also, mortality risks depend on  
5 age at cessation, and at older ages this heterogeneous group would include people who quit smoking at  
6 a variety of ages.[1,40]  
7  
8  
9  
10

11  
12  
13  
14 Second, with those surveyed by NHIS in 1997 as the input cohort, we used the STOP model to project  
15 the prevalence of current, former, and never smokers each year from 1998 to 2009. In a two-way  
16 sensitivity analysis, we re-calibrated cessation multipliers and initiation multipliers with the goal of  
17 identifying multipliers that would minimize the CV-RMSE of STOP-reported current smoker prevalence  
18 compared to NHIS current smoker prevalence. The initiation multipliers were applied to smoking  
19 initiation rates for never smokers. We then compared the cessation multipliers from this step with those  
20 from the cross-validation calibration step.  
21  
22  
23  
24  
25  
26  
27  
28  
29  
30

### 31 *Input parameters*

32  
33 Initial distributions of age, sex, and smoking status for the population simulated in the external  
34 validation exercises came from two sources: aggregated 1997-2009 NHIS data for the mortality external  
35 validation, and 1997 NHIS data for the smoking prevalence external validation (table 2 and  
36 supplementary figure 1). We obtained NHIS data in aggregate for years 1997-2009 from the Integrated  
37 Public Use Microdata Series.[35] We used NHIS data through 2009 because those were the data used in  
38 the CISNET studies, which were our comparator in cross-validation exercises.[37,41] These data  
39 provided initial distributions of smoking status and years of abstinence for former smokers (to inform  
40 relapse risks). From these 1997-2009 NHIS data, we derived age- and sex-specific smoking initiation and  
41 cessation rates using self-reported age at initiation and age at cessation variables (supplementary table  
42  
43  
44  
45  
46  
47  
48  
49  
50  
51  
52  
53  
54  
55  
56  
57  
58  
59  
60

1  
2  
3 1). As in our cross-validation exercises, we converted the cessation rates to quit attempt rates by  
4  
5 incorporating relapse rates and cessation multipliers.  
6  
7

8  
9  
10 The NHIS data included linked National Death Index (NDI) mortality outcomes through 2011 for  
11  
12 respondents for whom mortality data were available. We calculated mortality rates by age, sex, and  
13  
14 smoking status of the same NHIS respondents (supplementary table 1).  
15  
16

### 17 18 19 **Patient and public involvement**

20  
21 We did not involve patients or the public in our work.  
22  
23

### 24 25 **Ethics statement**

26  
27 This study was approved by the Partners Human Research Committee (2019P001772).  
28  
29  
30  
31  
32  
33  
34  
35  
36  
37  
38  
39  
40  
41  
42  
43  
44  
45  
46  
47  
48  
49  
50  
51  
52  
53  
54  
55  
56  
57  
58  
59  
60

## RESULTS

### Cross-validation

#### *Initial cross-validation, without relapse*

The STOP-projected prevalence of current, former, and never smokers over time fit CISNET-projected data well for the 1950 birth cohort in the US (figure 2, blue line vs. red dotted line, RMSE <0.03, CV-RMSE 15%/7% for women/men). The STOP-estimated prevalence of current smokers at age 25 years, approaching peak prevalence for the 1950 birth cohort, was 40% for women and 54% for men, compared to CISNET estimates of 38% and 52%.

#### *Incorporating smoking relapse and calibrating cessation probabilities*

After incorporating smoking relapse, the prevalence of current smokers far exceeded that reported by the CISNET model, as expected since many of those who would have become former smokers reverted to being current smokers (figure 2, pink dashed lines). We then aimed to reflect all quit attempts rather than only transitions to sustained abstinence. In rough calibrations, we found that the optimal multiplier would be between 5 and 10 when applied to cessation rates from the previous step. In finer calibrations, we varied the multiplier across the range of 5 to 10 in increments of 0.25. We found that multiplying the CISNET-reported cessation rates by 7.75 for women and by 7.25 for men best approximated the CISNET-projected prevalence of current smokers, with RMSE 0.004/0.008 and CV-RMSE 2%/3% for women/men (figure 2, black lines).

### External validation

#### *Mortality*

In simulating the 1997-2009 NHIS population along with smoking relapse, we found that the age-, sex-, and smoking-stratified mortality rates generated by the STOP model were a good fit to those derived



1  
2  
3 from NHIS (MAPE 7%, examples in supplementary table 2). Cumulative mortality curves for 20 year-old  
4 female and male current smokers and never smokers were similar between STOP projections and NHIS-  
5 derived data, with RMSE <0.01 and CV-RMSE  $\leq$ 1% (figure 3). For 20-year-olds who continued to smoke  
6 until death, the STOP model predicted median life expectancy (counting years from birth) of 77.5 years  
7 for women and 72.5 years for men.  
8  
9  
10  
11  
12  
13  
14  
15

### 16 *Smoking prevalence*

17  
18 Using those surveyed by NHIS in 1997 as the input cohort, the STOP-projected prevalence of current,  
19 former, and never smokers each year from 1998 to 2009 was similar to that reported by NHIS, with  
20 overall RMSE 0.04 and CV-RMSE 12% for both women and men (ages 30-84 years combined;  
21 supplementary figure 2 shows results specifically for ages 40-44 years). Compared to NHIS, the STOP  
22 model slightly underpredicted never smoker prevalence and slightly overpredicted former smoker  
23 prevalence in later years. In the two-way sensitivity analysis, we found that cessation multipliers of  
24 7.5/7.0 for women/men and initiation multipliers of 0.9/1.0 provided the best overall fit (lowest RMSE)  
25 of STOP-projected current smoker prevalence compared to that reported by NHIS (supplementary figure  
26 3).  
27  
28  
29  
30  
31  
32  
33  
34  
35  
36  
37  
38  
39  
40  
41  
42  
43  
44  
45  
46  
47  
48  
49  
50  
51  
52  
53  
54  
55  
56  
57  
58  
59  
60

## DISCUSSION

We developed, calibrated, and validated STOP, a novel microsimulation model of individual-level tobacco use behaviors and outcomes. Our initial model input parameters included smoking initiation and cessation and smoking-stratified mortality, and we demonstrated cross-validity compared to the CISNET model. After incorporating relapse, we calibrated smoking cessation probabilities to reflect quit attempts rather than sustained abstinence. We then validated STOP model output with: 1) smoking prevalence over time reported by the CISNET model for US women and men born in 1950; 2) age-, sex-, and smoking-stratified mortality rates and cumulative mortality reported by the NHIS-NDI linked database for the years 1997-2009; and 3) prevalence of current, former, and never smokers by sex from 1998 to 2009 reported by NHIS, using 1997 NHIS-reported population characteristics as inputs.

Most existing tobacco models simulate at the population level or lack the capacity to consider smoking initiation and (non-sustained) quit attempts throughout a lifetime.[18,23–25,37,46,47] The individual-level details of STOP can be employed to simulate and compare behaviors and interventions. While this calibration and validation analysis focused on cigarette smoking because of the availability of historical data for comparisons, we intend to broaden the use of STOP to include electronic cigarettes (e-cigs). Longitudinal cohort studies and clinical trials are examining the effects of e-cig use on tobacco smoking behaviors and clinical outcomes over long time horizons, but data are needed now to inform guidelines and policy around these novel products.[15,44,48,49] Results from multiple distinct, validated models can help motivate policy decisions, and consistency of policy recommendations across unique, independent models reinforces confidence in their recommendations.[50–54]

A novel aspect of the STOP model is the incorporation of smoking relapse on a monthly basis, reflecting the understanding of nicotine addiction as a chronic relapsing condition with rapid cycles between use

1  
2  
3 and cessation.[26,45,55–58] This key feature enables an important distinction between a quit attempt  
4 and sustained abstinence. This distinction is missing from most tobacco models and indeed from many  
5 epidemiologic studies of smoking and smoking cessation, which consider the transition from “current”  
6 to “former” smoker to be an abrupt one that results in sustained abstinence. Incorporating relapse  
7 required calibrating cessation rates by applying multipliers. The cessation multipliers that provided the  
8 best fits to empirical data are in line with published data regarding the number of quit attempts  
9 required before sustained abstinence is achieved.[27,55,59] The slightly higher multiplier needed for  
10 women compared to men is consistent with NHIS data showing that among ever smokers (current  
11 smokers plus former smokers) aged 60 years and above, a greater proportion of women compared to  
12 men are former smokers.[35] Calibration of cessation rates may compensate for other inaccuracies in  
13 model inputs or structure, though the pre-calibration (without relapse) STOP-generated results fit well  
14 with those of CISNET.  
15  
16  
17  
18  
19  
20  
21  
22  
23  
24  
25  
26  
27  
28  
29  
30  
31

32 Many trials of smoking cessation interventions follow patients for a few months or up to one year, but  
33 they do not report subsequent relapse. By including relapse, the STOP model can combine data from  
34 short-term trials of smoking cessation interventions with data from natural history studies of smoking  
35 and smoking cessation to project longer-term outcomes including sustained abstinence. The flexibility to  
36 integrate data from a variety of sources is a strength of modeling analyses.  
37  
38  
39  
40  
41  
42  
43  
44  
45

46 Going forward, we plan to use the STOP model to study contemporary rather than historical populations  
47 and to predict future tobacco use, while utilizing deterministic and probabilistic sensitivity analyses to  
48 account for uncertainty in future behavioral transition probabilities and mortality probabilities.[60] As  
49 no empirical data exist with which to validate model output of future tobacco use, we validated STOP  
50 model output against historical populations. Most US historical data on smoking prevalence and  
51  
52  
53  
54  
55  
56  
57  
58  
59  
60

1  
2  
3 smoking-associated mortality are based at least in part on NHIS, the oldest ongoing survey of smoking  
4 prevalence in the US.[1,61–63] We compared STOP model output to CISNET model output, to NHIS  
5 itself, and to results from a study by Jha et al.,[1] all of which used NHIS data. We demonstrated cross-  
6 validity of STOP compared to CISNET model results when using CISNET input parameters and then added  
7 relapse probabilities and cessation multipliers. We demonstrated external validity, in a partially  
8 dependent manner, of STOP compared to NHIS data when using some NHIS-derived input parameters  
9 plus the external relapse probabilities and cessation multipliers from our cross-validation. Though  
10 independent external validation sources are ideal, dependent sources can still be useful, especially in  
11 this scenario where most of the available US historical smoking prevalence, behavior, and mortality data  
12 are derived from NHIS.[28] Of note, in a two-way sensitivity analysis in which we simultaneously varied  
13 the smoking initiation and cessation multipliers to achieve a close fit to NHIS smoking prevalence data,  
14 the optimal cessation multipliers were very similar to those we found in our cross-validation calibration  
15 step, demonstrating the robustness of these multipliers across different sets of assumptions.  
16  
17  
18  
19  
20  
21  
22  
23  
24  
25  
26  
27  
28  
29  
30  
31  
32  
33

34 In an external validation exercise, the STOP model projection for never smoker prevalence from 1998 to  
35 2009 was slightly lower than that reported by NHIS, and the STOP model projection for former smoker  
36 prevalence was slightly higher than NHIS data. In NHIS, former smokers were self-defined but on  
37 average had been abstinent for over a decade. NHIS considered those who smoked “some days” to be  
38 current smokers, though some of them may have been in the midst of a short-duration quit attempt.  
39 STOP model output formally labels these people, who may be in the Recent Quitter state, , former  
40 smokers but assigns them the mortality risks of current smokers (until a defined period of abstinence).  
41 STOP reflects monthly quitting and relapsing behaviors whereas NHIS is an annual cross-sectional  
42 survey. Thus, one would expect the STOP model to report a higher prevalence of former smokers than  
43 NHIS, as seen in our results. Immigration could also account for some of the difference between NHIS  
44  
45  
46  
47  
48  
49  
50  
51  
52  
53  
54  
55  
56  
57  
58  
59  
60

1  
2  
3 data and STOP model-generated results: immigrants were surveyed in NHIS but our model analysis does  
4 not account for them. Smoking prevalence differs between the immigrant and non-immigrant  
5  
6 populations.[64,65] On the other hand, STOP model-generated life expectancies were similar to the  
7  
8 median life expectancies for 30-year-old smokers reported by Jha et al. (also derived from NHIS data): 77  
9  
10 years for women and 72 years for men.[1]  
11  
12  
13  
14  
15

16 The STOP model has features, and will have applications, not described in this analysis. We developed  
17  
18 the model to incorporate resource utilization. The STOP model can capture the healthcare costs  
19  
20 associated with being a current, former, or never smoker, as well as the costs of tobacco cessation  
21  
22 interventions. By incorporating the chronic relapsing nature of nicotine addiction, the STOP model can  
23  
24 account for the resources required for recurrent cessation interventions (e.g., restarting the same or a  
25  
26 different intervention after smoking relapse), an important consideration in cost-effectiveness and  
27  
28 policy analyses. Ultimately, we will use the STOP model to evaluate behavioral and clinical outcomes,  
29  
30 costs of care, and cost-effectiveness of tobacco cessation interventions, programs, and policies. An  
31  
32 overarching goal is to provide information that can inform decision makers – including clinicians, public  
33  
34 health officials, and policymakers – on cost-effective interventions that reduce the clinical and economic  
35  
36 burden of tobacco use. The model can eventually assess the impact of different financing options for  
37  
38 tobacco cessation interventions – for example, annual versus lifetime insurance coverage limits. The  
39  
40 STOP model’s flexibility will allow for analyses beyond US populations, including settings where  
41  
42 smoking-related behaviors and clinical outcomes may be different from those in the US.[66]  
43  
44  
45  
46  
47  
48  
49

50 The STOP model has limitations. Its projections are limited by assumptions and the degree of specificity  
51  
52 of available data – for example, age, sex, and birth year stratifications of smoking behavioral transitions.  
53  
54 While we have aimed to calibrate and validate the model with the best available historical data, any use  
55  
56  
57  
58  
59  
60

1  
2  
3 of the model to project future outcomes should be approached with prudence. Calibration on historical  
4 data is no panacea because of concerns of calibration drift. Nonetheless, input parameter values can be  
5 varied in sensitivity analysis. STOP does not include dynamics such as the effects of one person's  
6 smoking on another person's smoking behaviors. Smoking is associated with other factors not directly  
7 captured by STOP, including race, socioeconomic status, mental illness, and other substance use, but  
8 different populations can be separately simulated in the model with input parameters specific to that  
9 population. There is considerable heterogeneity in smoking behaviors, including cigarettes consumed  
10 per day and daily versus nondaily smoking. STOP enables stratification by intensity of smoking, which  
11 can be used to represent amount or frequency of smoking.  
12  
13  
14  
15  
16  
17  
18  
19  
20  
21  
22  
23  
24

25 In conclusion, STOP is a novel, individual-level microsimulation model that captures tobacco-related  
26 behaviors – importantly including relapse – and outcomes with a goal of informing decision making  
27 around tobacco cessation interventions and tobacco policy. We have demonstrated that the model is  
28 well-calibrated and validated to another model and to historical cohorts. We plan to use the model for  
29 policy-relevant analysis of contemporary patient-level and population-level care while reflecting real-life  
30 tobacco use and cessation behaviors.  
31  
32  
33  
34  
35  
36  
37  
38  
39  
40  
41  
42  
43  
44  
45  
46  
47  
48  
49  
50  
51  
52  
53  
54  
55  
56  
57  
58  
59  
60

## **AUTHOR CONTRIBUTIONS**

Specific contributions are as follows:

KPR – study conception, study design, data analysis, data interpretation

AJB – study design, data analysis, data interpretation

DEL – study design, data interpretation

PT – data analysis, data interpretation

EPH – study design, data interpretation

TH – study conception, study design, data analysis

BO – study design

LY – data analysis, data interpretation

FMS – study design, data analysis, data interpretation

ADP – study design, data interpretation

KAF – study design, data interpretation

MCW – study design, data interpretation

NAR – study conception, study design, data interpretation

RPW – study conception, study design, data interpretation

KPR drafted the first version of the manuscript. All authors critically reviewed the manuscript for important intellectual content and approved the final submitted version.

**COMPETING INTERESTS**

NAR receives royalties from UpToDate, Inc., is a consultant for Achieve Life Sciences, and has been an unpaid consultant for Pfizer. All other authors report no competing interests.

**SOURCES OF FUNDING**

This work was supported by awards from the National Institute on Drug Abuse (K01 DA042687) and the National Heart, Lung, and Blood Institute (K01 HL123349) of the National Institutes of Health, and the Steve and Deborah Gorlin MGH Research Scholars Award. The funding sources had no role in the design, analysis, or interpretation of the study, the writing of the manuscript, or in the decision to submit the manuscript for publication. The content is solely the responsibility of the authors and does not necessarily represent the official views of the National Institutes of Health or Massachusetts General Hospital.

**DATA STATEMENT**

Data used to parameterize the model are publicly available at <https://resources.cisnet.cancer.gov/projects> and at <https://nhis.ipums.org/nhis>.



## REFERENCES

- 1 Jha P, Ramasundarahettige C, Landsman V, *et al*. 21st-century hazards of smoking and benefits of cessation in the United States. *N Engl J Med* 2013;**368**:341–50. doi:10.1056/NEJMsa1211128
- 2 Xu X, Bishop EE, Kennedy SM, *et al*. Annual healthcare spending attributable to cigarette smoking: an update. *Am J Prev Med* 2015;**48**:326–33. doi:10.1016/j.amepre.2014.10.012
- 3 US Department of Health and Human Services. *The health consequences of smoking-50 years of progress: a report of the Surgeon General*. Atlanta, GA: US Department of Health and Human Services, Centers for Disease Control and Prevention, National Center for Chronic Disease Prevention and Health Promotion, Office on Smoking and Health 2014. <https://www.hhs.gov/surgeongeneral/reports-and-publications/tobacco/index.html>
- 4 Creamer MR, Wang TW, Babb S, *et al*. Tobacco product use and cessation indicators among adults - United States, 2018. *MMWR Morb Mortal Wkly Rep* 2019;**68**:1013–9. doi:10.15585/mmwr.mm6845a2
- 5 Patel KK, Jones PG, Ellerbeck EF, *et al*. Underutilization of evidence-based smoking cessation support strategies despite high smoking addiction burden in peripheral artery disease specialty care: insights from the international PORTRAIT registry. *J Am Heart Assoc* 2018;**7**:e010076. doi:10.1161/JAHA.118.010076
- 6 Office of the Commissioner, US Food and Drug Administration. FDA finalizes guidance for premarket tobacco product applications for electronic nicotine delivery systems as part of commitment to continuing a strong oversight of e-cigarettes. 11 Jun 2019. <http://www.fda.gov/news-events/press-announcements/fda-finalizes-guidance-premarket-tobacco-product-applications-electronic-nicotine-delivery-systems> (accessed 9 Jan 2020).
- 7 Office of the Commissioner, US Food and Drug Administration. FDA permits sale of IQOS Tobacco Heating System through premarket tobacco product application pathway. 30 Apr 2019. <http://www.fda.gov/news-events/press-announcements/fda-permits-sale-iqos-tobacco-heating-system-through-premarket-tobacco-product-application-pathway> (accessed 9 Jan 2020).
- 8 Reddy KP, Parker RA, Losina E, *et al*. Impact of cigarette smoking and smoking cessation on life expectancy among people with HIV: a US-based modeling study. *J Infect Dis* 2016;**214**:1672–81. doi:10.1093/infdis/jiw430
- 9 Reddy KP, Kong CY, Hyle EP, *et al*. Lung cancer mortality associated with smoking and smoking cessation among people living with HIV in the United States. *JAMA Intern Med* 2017;**177**:1613–21. doi:10.1001/jamainternmed.2017.4349
- 10 Apelberg BJ, Feirman SP, Salazar E, *et al*. Potential public health effects of reducing nicotine levels in cigarettes in the United States. *N Engl J Med* 2018;**378**:1725–33. doi:10.1056/NEJMsr1714617
- 11 Walensky RP, Ross EL, Kumarasamy N, *et al*. Cost-effectiveness of HIV treatment as prevention in serodiscordant couples. *N Engl J Med* 2013;**369**:1715–25. doi:10.1056/NEJMsa1214720

- 1  
2  
3 12 Reddy KP, Gupta-Wright A, Fielding KL, *et al.* Cost-effectiveness of urine-based tuberculosis  
4 screening in hospitalised patients with HIV in Africa: a microsimulation modelling study. *Lancet Glob*  
5 *Health* 2019;**7**:e200–8. doi:10.1016/S2214-109X(18)30436-4  
6  
7 13 Weinstein MC, O'Brien B, Hornberger J, *et al.* Principles of good practice for decision analytic  
8 modeling in health-care evaluation: report of the ISPOR Task Force on Good Research Practices--  
9 Modeling Studies. *Value Health* 2003;**6**:9–17. doi:10.1046/j.1524-4733.2003.00234.x  
10  
11 14 Sanders GD, Neumann PJ, Basu A, *et al.* Recommendations for conduct, methodological practices,  
12 and reporting of cost-effectiveness analyses: Second Panel on Cost-Effectiveness in Health and  
13 Medicine. *JAMA* 2016;**316**:1093–103. doi:10.1001/jama.2016.12195  
14  
15 15 National Academies of Sciences, Engineering, and Medicine. *Public Health Consequences of E-*  
16 *Cigarettes*. Washington, DC: The National Academies Press 2018. doi:10.17226/24952  
17  
18 16 Office of Disease Prevention, National Institutes of Health. Tobacco regulatory research priorities.  
19 <https://prevention.nih.gov/tobacco-regulatory-research/tobacco-regulatory-research-priorities>  
20 (accessed 9 Jan 2020).  
21  
22 17 Levy DT, Cummings KM, Villanti AC, *et al.* A framework for evaluating the public health impact of e-  
23 cigarettes and other vaporized nicotine products. *Addiction* 2017;**112**:8–17. doi:10.1111/add.13394  
24  
25 18 Levy DT, Yuan Z, Li Y, *et al.* A modeling approach to gauging the effects of nicotine vaping product  
26 use on cessation from cigarettes: what do we know, what do we need to know? *Addiction* 2019;**114**  
27 **Suppl 1**:86–96. doi:10.1111/add.14530  
28  
29 19 Warner KE, Mendez D. E-cigarettes: comparing the possible risks of increasing smoking initiation  
30 with the potential benefits of increasing smoking cessation. *Nicotine Tob Res* 2019;**21**:41–7.  
31 doi:10.1093/ntr/nty062  
32  
33 20 Cherng ST, Tam J, Christine P, *et al.* Modeling the effects of e-cigarettes on smoking behavior:  
34 implications for future adult smoking prevalence. *Epidemiology* 2016;**27**:819–26.  
35 doi:10.1097/EDE.0000000000000497  
36  
37 21 Kalkhoran S, Glantz SA. Modeling the health effects of expanding e-cigarette sales in the United  
38 States and United Kingdom: a Monte Carlo analysis. *JAMA Intern Med* 2015;**175**:1671–80.  
39 doi:10.1001/jamainternmed.2015.4209  
40  
41 22 Vugrin ED, Rostron BL, Verzi SJ, *et al.* Modeling the potential effects of new tobacco products and  
42 policies: a dynamic population model for multiple product use and harm. *PLoS One*  
43 2015;**10**:e0121008. doi:10.1371/journal.pone.0121008  
44  
45 23 Levy DT, Borland R, Lindblom EN, *et al.* Potential deaths averted in USA by replacing cigarettes with  
46 e-cigarettes. *Tob Control* 2018;**27**:18–25. doi:10.1136/tobaccocontrol-2017-053759  
47  
48 24 Soneji SS, Sung H-Y, Primack BA, *et al.* Quantifying population-level health benefits and harms of e-  
49 cigarette use in the United States. *PLoS One* 2018;**13**:e0193328. doi:10.1371/journal.pone.0193328  
50  
51  
52  
53  
54  
55  
56  
57  
58  
59  
60

- 1  
2  
3 25 Levy DT, Borland R, Villanti AC, *et al.* The application of a decision-theoretic model to estimate the  
4 public health impact of vaporized nicotine product initiation in the United States. *Nicotine Tob Res*  
5 2017;**19**:149–59. doi:10.1093/ntr/ntw158  
6  
7 26 Hughes JR, Solomon LJ, Naud S, *et al.* Natural history of attempts to stop smoking. *Nicotine Tob Res*  
8 2014;**16**:1190–8. doi:10.1093/ntr/ntu052  
9  
10 27 Chaiton M, Diemert L, Cohen JE, *et al.* Estimating the number of quit attempts it takes to quit  
11 smoking successfully in a longitudinal cohort of smokers. *BMJ Open* 2016;**6**:e011045.  
12 doi:10.1136/bmjopen-2016-011045  
13  
14 28 Eddy DM, Hollingworth W, Caro JJ, *et al.* Model transparency and validation: a report of the ISPOR-  
15 SMDM Modeling Good Research Practices Task Force-7. *Med Decis Making* 2012;**32**:733–43.  
16 doi:10.1177/0272989X12454579  
17  
18 29 Vanni T, Karnon J, Madan J, *et al.* Calibrating models in economic evaluation: a seven-step approach.  
19 *Pharmacoeconomics* 2011;**29**:35–49. doi:10.2165/11584600-000000000-00000  
20  
21 30 Karnon J, Vanni T. Calibrating models in economic evaluation: a comparison of alternative measures  
22 of goodness of fit, parameter search strategies and convergence criteria. *Pharmacoeconomics*  
23 2011;**29**:51–62. doi:10.2165/11584610-000000000-00000  
24  
25 31 Cevik M, Ergun MA, Stout NK, *et al.* Using active learning for speeding up calibration in simulation  
26 models. *Med Decis Making* 2016;**36**:581–93. doi:10.1177/0272989X15611359  
27  
28 32 Ciaranello AL, Morris BL, Walensky RP, *et al.* Validation and calibration of a computer simulation  
29 model of pediatric HIV infection. *PLoS One* 2013;**8**:e83389. doi:10.1371/journal.pone.0083389  
30  
31 33 Rydzak CE, Cotich KL, Sax PE, *et al.* Assessing the performance of a computer-based policy model of  
32 HIV and AIDS. *PLoS One* 2010;**5**. doi:10.1371/journal.pone.0012647  
33  
34 34 Kazemian P, Wexler DJ, Fields NF, *et al.* Development and validation of PREDICT-DM: a new  
35 microsimulation model to project and evaluate complications and treatments of type 2 diabetes  
36 mellitus. *Diabetes Technol Ther* 2019;**21**:344–55. doi:10.1089/dia.2018.0393  
37  
38 35 Blewett LA, Rivera Drew JA, Griffin R, *et al.* *IPUMS Health Surveys: National Health Interview Survey,*  
39 *Version 6.3 [dataset]*. Minneapolis, MN: IPUMS. <https://nhis.ipums.org> (accessed 9 Jan 2020).  
40  
41 36 Centers for Disease Control and Prevention. National Health Interview Survey. Adult tobacco use -  
42 major changes. [https://www.cdc.gov/nchs/nhis/tobacco/tobacco\\_changes.htm](https://www.cdc.gov/nchs/nhis/tobacco/tobacco_changes.htm) (accessed 9 Jan  
43 2020).  
44  
45 37 Holford TR, Meza R, Warner KE, *et al.* Tobacco control and the reduction in smoking-related  
46 premature deaths in the United States, 1964-2012. *JAMA* 2014;**311**:164–71.  
47 doi:10.1001/jama.2013.285112  
48  
49 38 Weinstein MC. Recent developments in decision-analytic modelling for economic evaluation.  
50 *Pharmacoeconomics* 2006;**24**:1043–53. doi:10.2165/00019053-200624110-00002  
51  
52  
53  
54  
55  
56  
57  
58  
59  
60

- 1  
2  
3 39 Rutter CM, Zaslavsky A, Feuer E. Dynamic microsimulation models for health outcomes: a review.  
4 *Med Decis Making* 2011;**31**:10–8. doi:10.1177/0272989X10369005  
5  
6 40 Thun MJ, Carter BD, Feskanich D, *et al.* 50-year trends in smoking-related mortality in the United  
7 States. *N Engl J Med* 2013;**368**:351–64. doi:10.1056/NEJMsa1211127  
8  
9 41 Holford TR, Levy DT, McKay LA, *et al.* Patterns of birth cohort-specific smoking histories, 1965-2009.  
10 *Am J Prev Med* 2014;**46**:e31-37. doi:10.1016/j.amepre.2013.10.022  
11  
12 42 Tonstad S, Tønnesen P, Hajek P, *et al.* Effect of maintenance therapy with varenicline on smoking  
13 cessation: a randomized controlled trial. *JAMA* 2006;**296**:64–71. doi:10.1001/jama.296.1.64  
14  
15 43 Brendryen H, Kraft P. Happy Ending: a randomized controlled trial of a digital multi-media smoking  
16 cessation intervention. *Addiction* 2008;**103**:478–84. doi:10.1111/j.1360-0443.2007.02119.x  
17  
18 44 Bullen C, Howe C, Laugesen M, *et al.* Electronic cigarettes for smoking cessation: a randomised  
19 controlled trial. *Lancet* 2013;**382**:1629–37. doi:10.1016/S0140-6736(13)61842-5  
20  
21 45 Hughes JR, Keely J, Naud S. Shape of the relapse curve and long-term abstinence among untreated  
22 smokers. *Addiction* 2004;**99**:29–38. doi:10.1111/j.1360-0443.2004.00540.x  
23  
24 46 Warner KE, Mendez D. E-cigarettes: comparing the possible risks of increasing smoking initiation  
25 with the potential benefits of increasing smoking cessation. *Nicotine Tob Res* 2019;**21**:41–7.  
26 doi:10.1093/ntr/nty062  
27  
28 47 Feuer EJ, Levy DT, McCarthy WJ. Chapter 1: The impact of the reduction in tobacco smoking on U.S.  
29 lung cancer mortality, 1975–2000: an introduction to the problem. *Risk Analysis* 2012;**32**:S6–13.  
30 doi:10.1111/j.1539-6924.2011.01745.x  
31  
32 48 Hajek P, Phillips-Waller A, Przulj D, *et al.* A randomized trial of e-cigarettes versus nicotine-  
33 replacement therapy. *N Engl J Med* 2019;**380**:629–37. doi:10.1056/NEJMoa1808779  
34  
35 49 Population Assessment of Tobacco and Health (PATH).  
36 <https://pathstudyinfo.nih.gov/UI/HomeMobile.aspx> (accessed 9 Jan 2020).  
37  
38 50 Paltiel AD, Weinstein MC, Kimmel AD, *et al.* Expanded screening for HIV in the United States--an  
39 analysis of cost-effectiveness. *N Engl J Med* 2005;**352**:586–95. doi:10.1056/NEJMsa042088  
40  
41 51 Sanders GD, Bayoumi AM, Sundaram V, *et al.* Cost-effectiveness of screening for HIV in the era of  
42 highly active antiretroviral therapy. *N Engl J Med* 2005;**352**:570–85. doi:10.1056/NEJMsa042657  
43  
44 52 Dugdale CM, Ciaranello AL, Bekker L-G, *et al.* Risks and benefits of dolutegravir- and efavirenz-based  
45 strategies for South African women with HIV of child-bearing potential: a modeling study. *Ann*  
46 *Intern Med* 2019;**170**:614–25. doi:10.7326/M18-3358  
47  
48 53 Phillips AN, Venter F, Havlir D, *et al.* Risks and benefits of dolutegravir-based antiretroviral drug  
49 regimens in sub-Saharan Africa: a modelling study. *Lancet HIV* 2019;**6**:e116–27. doi:10.1016/S2352-  
50 3018(18)30317-5  
51  
52  
53  
54  
55  
56  
57  
58  
59  
60

- 1  
2  
3 54 Berry DA, Cronin KA, Plevritis SK, *et al.* Effect of screening and adjuvant therapy on mortality from  
4 breast cancer. *N Engl J Med* 2005;**353**:1784–92. doi:10.1056/NEJMoa050518  
5
- 6 55 Borland R, Partos TR, Yong H-H, *et al.* How much unsuccessful quitting activity is going on among  
7 adult smokers? Data from the International Tobacco Control Four Country cohort survey. *Addiction*  
8 2012;**107**:673–82. doi:10.1111/j.1360-0443.2011.03685.x  
9
- 10 56 Herd N, Borland R, Hyland A. Predictors of smoking relapse by duration of abstinence: findings from  
11 the International Tobacco Control (ITC) Four Country Survey. *Addiction* 2009;**104**:2088–99.  
12 doi:10.1111/j.1360-0443.2009.02732.x  
13
- 14 57 Herd N, Borland R. The natural history of quitting smoking: findings from the International Tobacco  
15 Control (ITC) Four Country Survey. *Addiction* 2009;**104**:2075–87. doi:10.1111/j.1360-  
16 0443.2009.02731.x  
17
- 18 58 National Institute on Drug Abuse. The science of drug use and addiction: the basics.  
19 <https://www.drugabuse.gov/publications/media-guide/science-drug-use-addiction-basics> (accessed  
20 9 Jan 2020).  
21
- 22 59 Jones JM. Smoking habits stable; most would like to quit. 18 Jul 2006. Gallup.com.  
23 <https://news.gallup.com/poll/23791/Smoking-Habits-Stable-Most-Would-Like-Quit.aspx> (accessed 9  
24 Jan 2020).  
25
- 26 60 Briggs AH, Weinstein MC, Fenwick EAL, *et al.* Model parameter estimation and uncertainty analysis:  
27 a report of the ISPOR-SMDM Modeling Good Research Practices Task Force Working Group-6. *Med*  
28 *Decis Making* 2012;**32**:722–32. doi:10.1177/0272989X12458348  
29
- 30 61 Wang TW, Asman K, Gentzke AS, *et al.* Tobacco product use among adults - United States, 2017.  
31 *MMWR Morb Mortal Wkly Rep* 2018;**67**:1225–32. doi:10.15585/mmwr.mm6744a2  
32
- 33 62 Babb S, Malarcher A, Schauer G, *et al.* Quitting smoking among adults - United States, 2000-2015.  
34 *MMWR Morb Mortal Wkly Rep* 2017;**65**:1457–64. doi:10.15585/mmwr.mm6552a1  
35
- 36 63 Garrett BE, Dube SR, Trosclair A, *et al.* Cigarette smoking - United States, 1965-2008. *MMWR Suppl*  
37 2011;**60**:109–13.  
38
- 39 64 Bosdriesz JR, Lichthart N, Witvliet MI, *et al.* Smoking prevalence among migrants in the US  
40 compared to the US-born and the population in countries of origin. *PLoS One* 2013;**8**:e58654.  
41 doi:10.1371/journal.pone.0058654  
42
- 43 65 Pampel F, Khat M, Bricard D, *et al.* Smoking among immigrant groups in the United States:  
44 prevalence, education gradients, and male-to-female ratios. *Nicotine Tob Res* Published Online First:  
45 13 February 2019. doi:10.1093/ntr/ntz022  
46
- 47 66 GBD 2015 Tobacco Collaborators. Smoking prevalence and attributable disease burden in 195  
48 countries and territories, 1990-2015: a systematic analysis from the Global Burden of Disease Study  
49 2015. *Lancet* 2017;**389**:1885–906. doi:10.1016/S0140-6736(17)30819-X  
50  
51  
52  
53  
54  
55  
56  
57  
58  
59  
60

## FIGURE LEGENDS

### **Figure 1. Overview of tobacco use states and transitions in Simulation of Tobacco and Nicotine Outcomes and Policy (STOP) microsimulation model.**

This is a simplified, stylized depiction of smoking states and transitions – for example, dimensions such as age and sex are not represented in the figure. The ovals represent possible cigarette smoking states or the deceased state. The arrows represent monthly transitions by which an individual can switch to a different state. The “Abstinence, sustained” transition is depicted by a dashed line because there is not a monthly probability of transition – instead, the transition occurs after an individual has spent a user-defined duration (e.g., one year) in the “Recent Quitter” state. Numerical examples of the transition probabilities are in supplementary table 1.

### **Figure 2. Cross-validation and calibration exercise: STOP-generated results and CISNET-generated results for current smoking prevalence over time for US people born in 1950.**

STOP: Simulation of Tobacco and Nicotine Outcomes and Policy model. CISNET: Cancer Intervention and Surveillance Modeling Network.

Panel A depicts women, Panel B depicts men. The red dotted line shows results from the CISNET model. The other three lines show STOP-generated results after each step of our parameterization and calibration process. The blue line includes parameterization of smoking initiation and cessation, but not relapse. The pink dashed line includes smoking relapse as based on published studies. The black line includes calibration of smoking cessation probabilities to reflect quit attempts and relapse before sustained abstinence.

1  
2  
3 **Figure 3. External validation: STOP model results and NHIS/NDI results for cumulative mortality of**  
4 **current smokers and never smokers from age 20.**  
5

6  
7 STOP: Simulation of Tobacco and Nicotine Outcomes and Policy. NHIS: National Health Interview Survey.

8  
9  
10 NDI: National Death Index. CV-RMSE: coefficient of variation of root-mean-square error.

11  
12  
13  
14 Panel A depicts women, Panel B depicts men. Within each panel, the STOP results and the NHIS data are  
15  
16 not easily distinguishable because they are essentially overlapping. Current smokers are those who  
17  
18 continue to smoke until death. NHIS was linked to NDI for mortality data.  
19  
20  
21  
22  
23  
24  
25  
26  
27  
28  
29  
30  
31  
32  
33  
34  
35  
36  
37  
38  
39  
40  
41  
42  
43  
44  
45  
46  
47  
48  
49  
50  
51  
52  
53  
54  
55  
56  
57  
58  
59  
60

# Figure 1

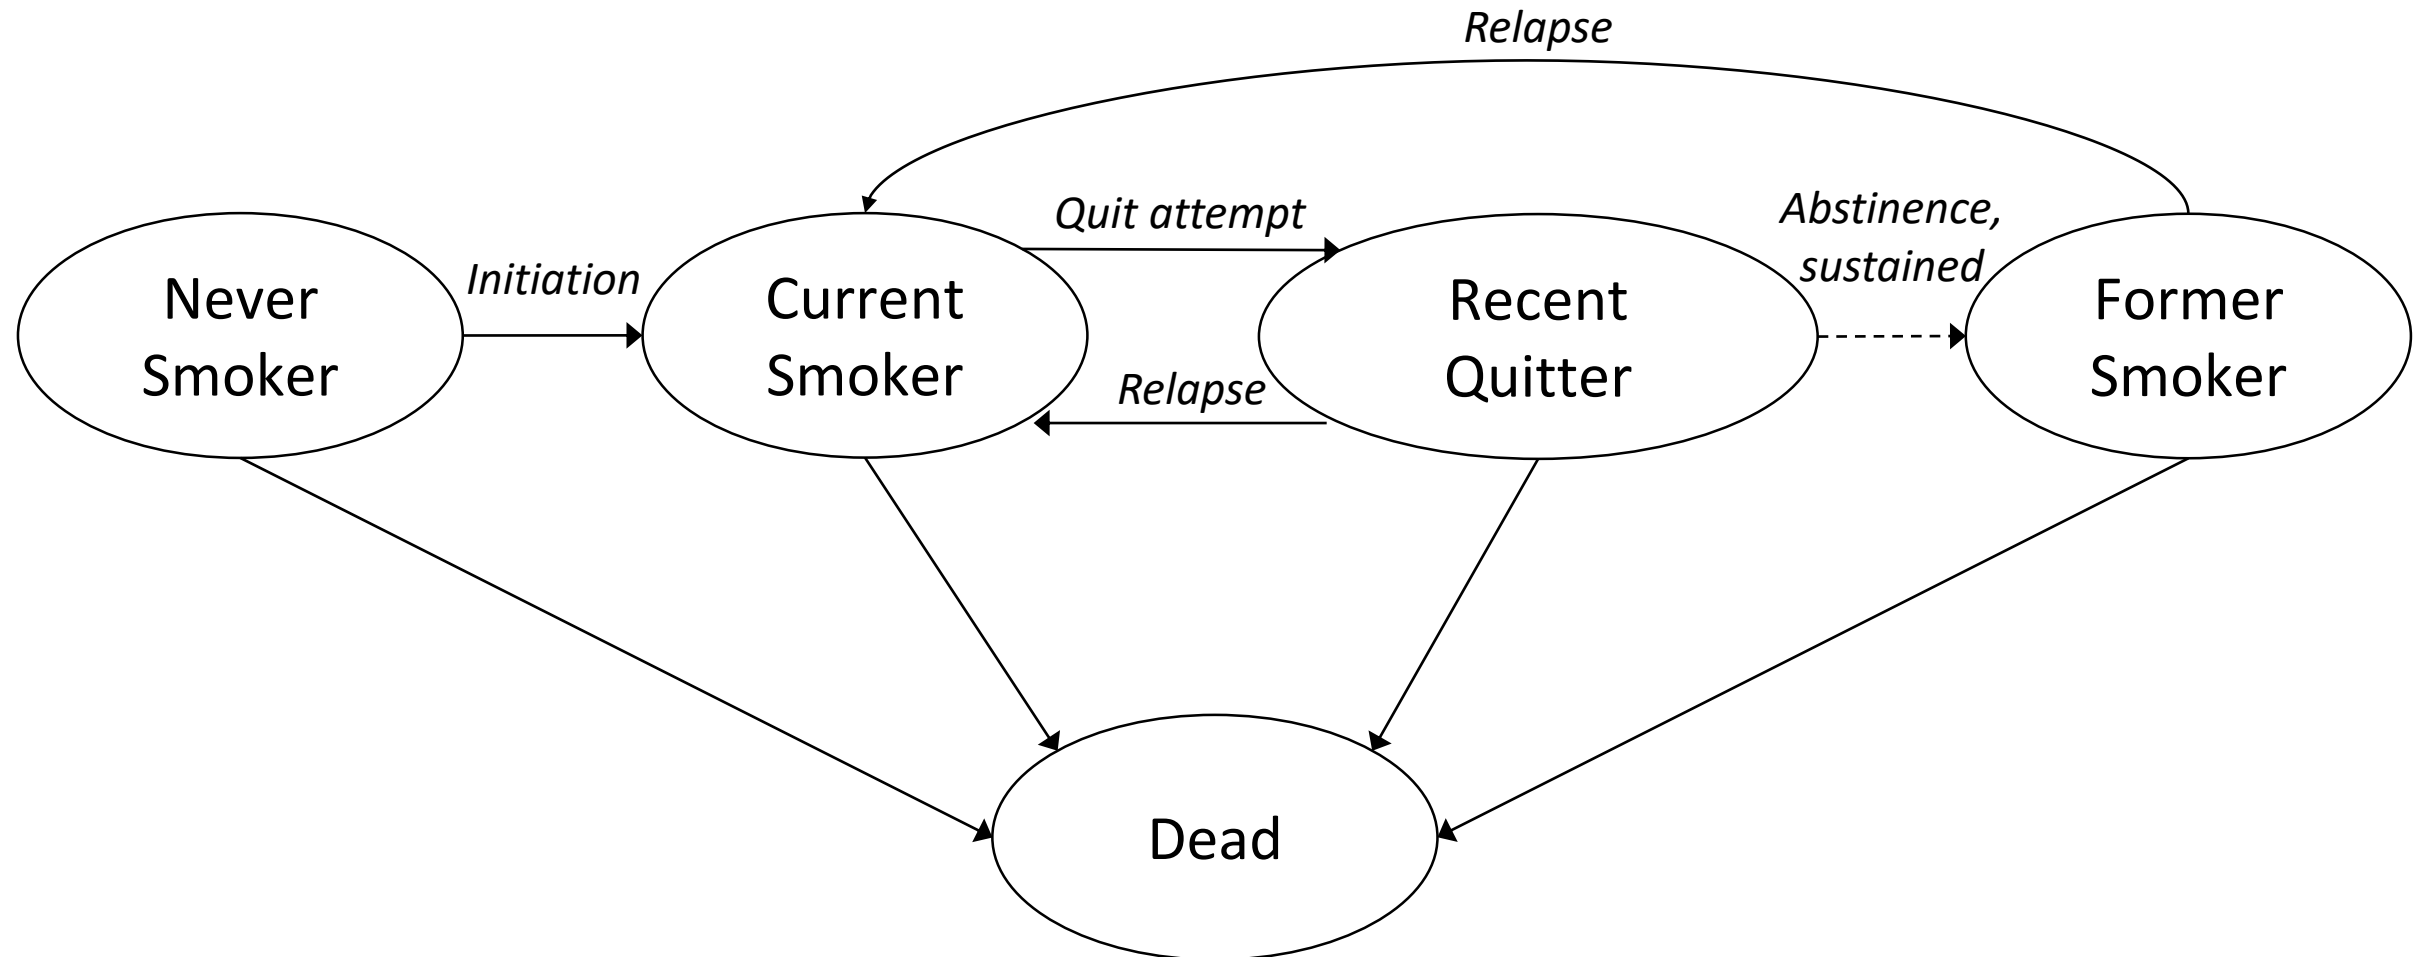

1  
2  
3  
4  
5  
6  
7  
8  
9  
10  
11  
12  
13  
14  
15  
16  
17  
18  
19  
20  
21  
22  
23  
24  
25  
26  
27  
28  
29  
30  
31  
32  
33  
34  
35  
36  
37  
38  
39  
40  
41



# Figure 2

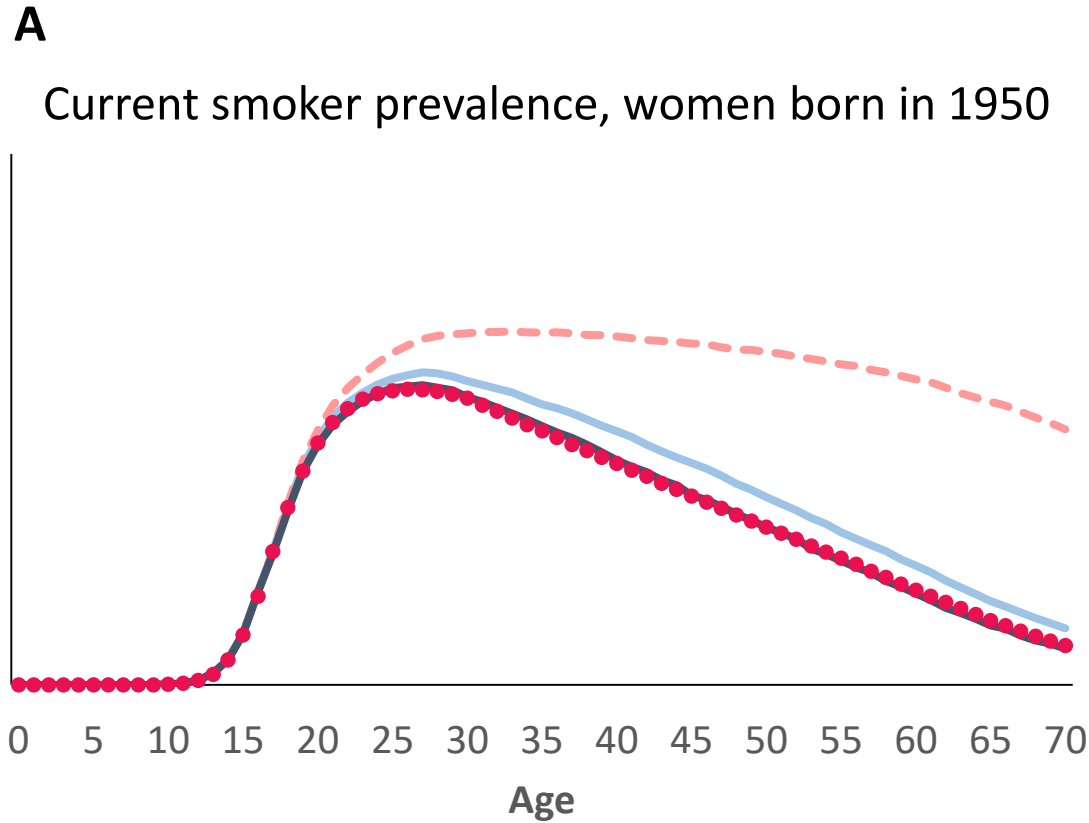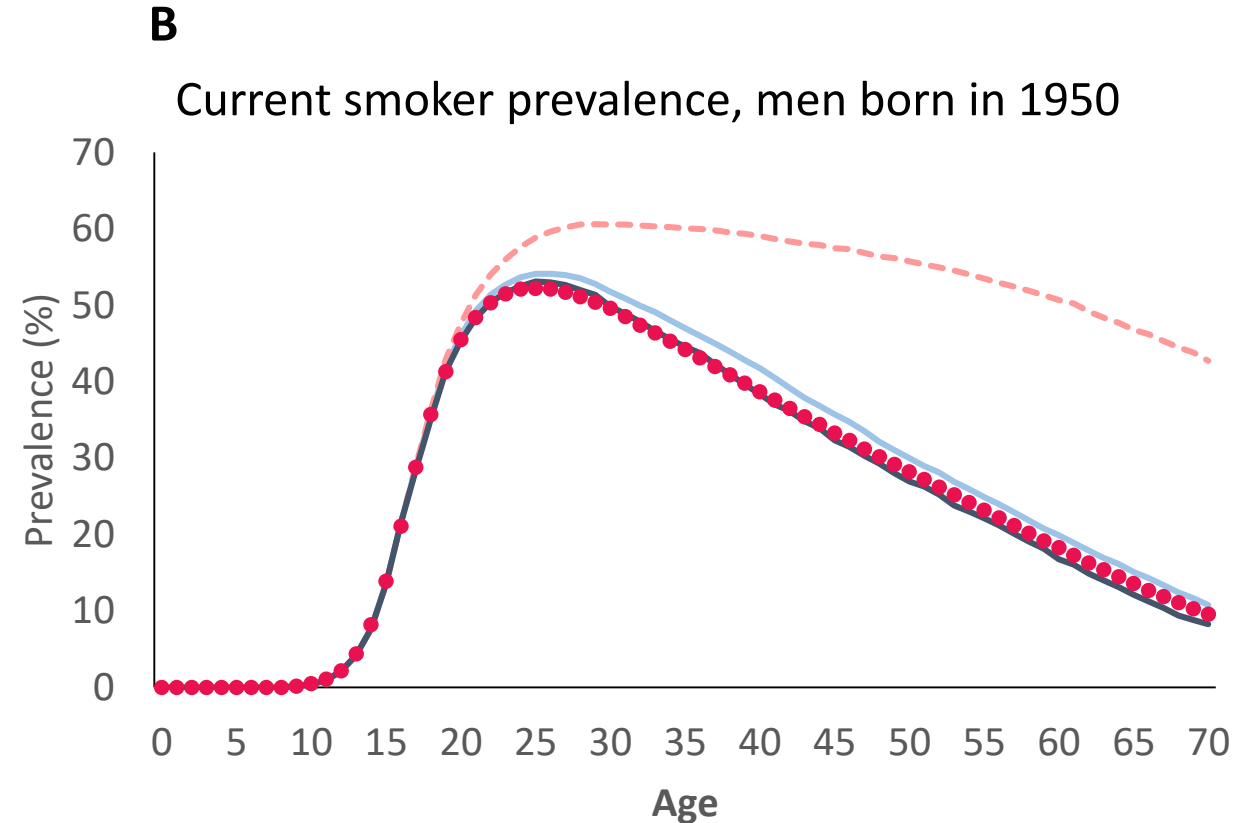

- 1. No relapse
- 2. Relapse incorporated, uncalibrated cessation
- 3. Relapse incorporated, calibrated cessation
- CISNET 1950

- 1. No relapse
- 2. Relapse incorporated, uncalibrated cessation
- 3. Relapse incorporated, calibrated cessation
- CISNET 1950

# Figure 3

**A**  
 Cumulative mortality by smoking status, women

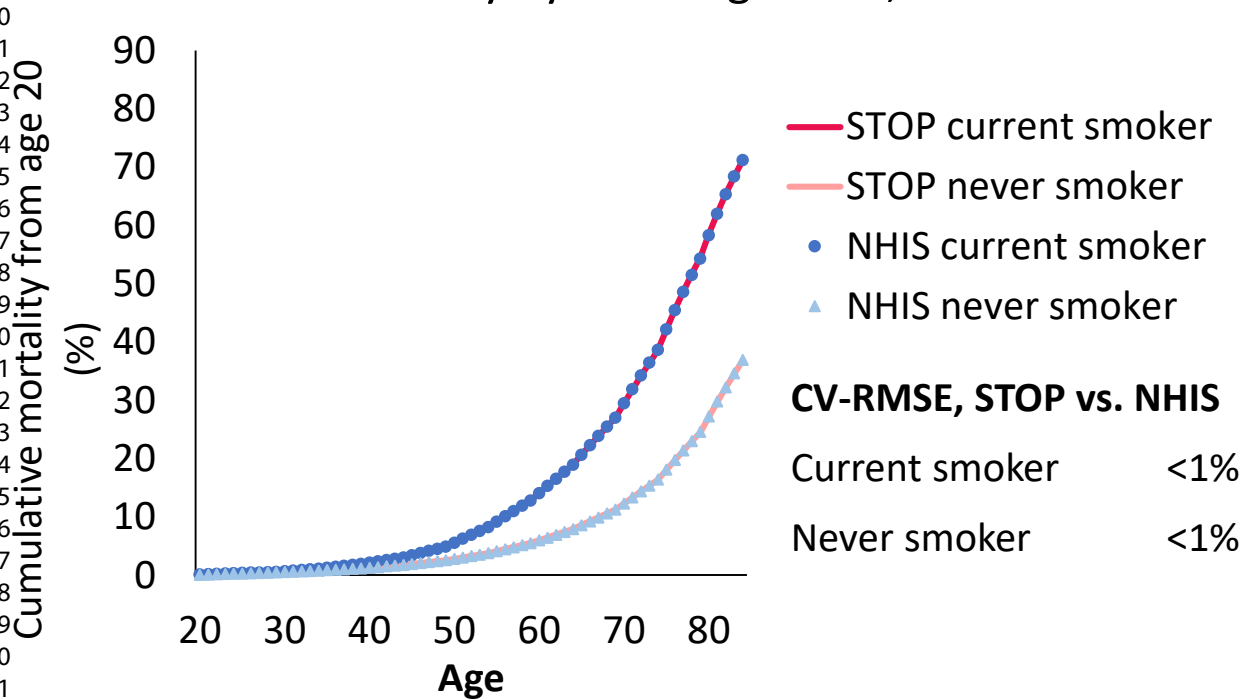

**B**  
 Cumulative mortality by smoking status, men

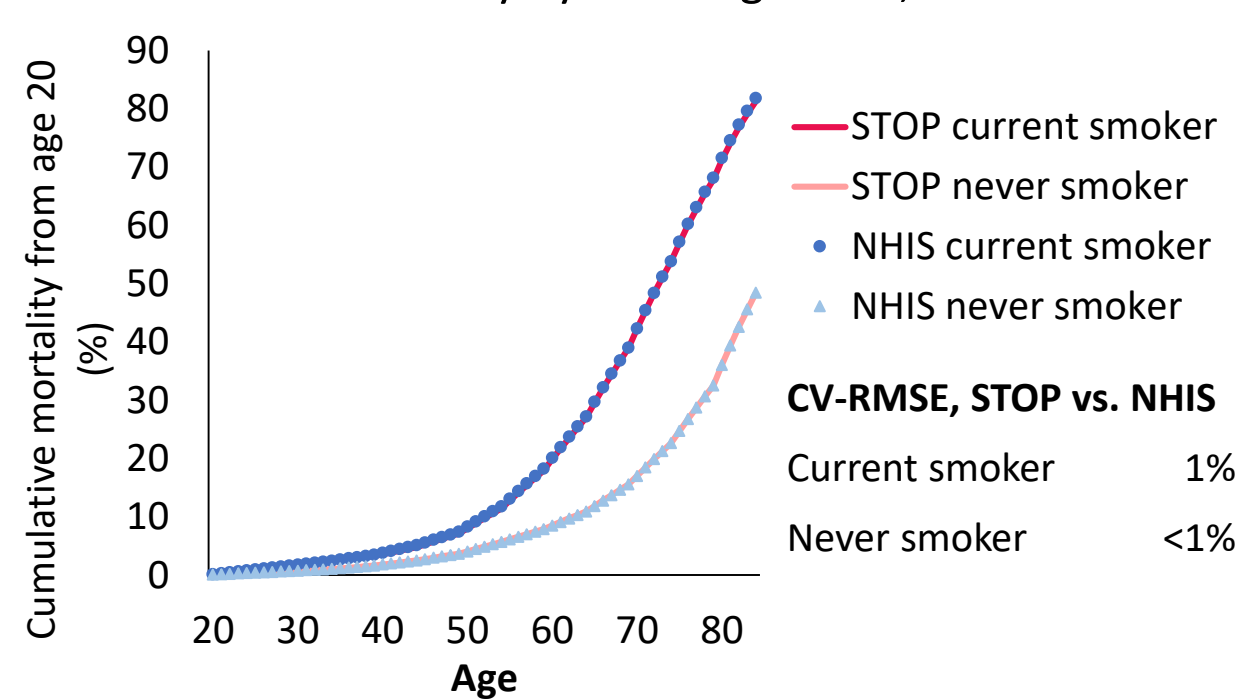

**A novel microsimulation model of tobacco use behaviors and outcomes:  
calibration and validation in a US population**

**Supplement**

Krishna P. Reddy, Alexander J.B. Bulteel, Douglas E. Levy, Pamela Torola, Emily P. Hyle, Taige Hou,  
Benjamin Osher, Liyang Yu, Fatma M. Shebl, A. David Paltiel, Kenneth A. Freedberg, Milton C. Weinstein,  
Nancy A. Rigotti, Rochelle P. Walensky

**Table of Contents**

|                             |       |
|-----------------------------|-------|
| Methods: Supplementary Text | p. 2  |
| References                  | p. 6  |
| Supplementary Table 1       | p. 7  |
| Supplementary Table 2       | p. 9  |
| Supplementary Figure 1      | p. 10 |
| Supplementary Figure 2      | p. 11 |
| Supplementary Figure 3      | p. 12 |

## **METHODS: SUPPLEMENTARY TEXT**

### **National Health Interview Survey (NHIS)**

NHIS is a yearly in-person questionnaire administered to the civilian noninstitutionalized population of the US which, since 1965, has collected information on individual smoking status. Since 1991, the smoking section of the NHIS has first queried “ever smoker” status – defined as having smoked at least 100 cigarettes in one’s lifetime – then asked ever smokers, “Do you NOW smoke cigarettes every day, some days or not at all?” which resulted in the classification of occasional smokers as current smokers, even though they initially may have said they did not smoke now. Regardless of response to the second question, participants were asked about the frequency of their smoking.[1]

### **Use of NHIS data in the Simulation of Tobacco and Nicotine Outcomes and Policy (STOP) model**

We downloaded NHIS and linked National Death Index (NDI) data from the Integrated Public Use Microdata Series (IPUMS) Health Surveys for the years 1997-2009.[2] We obtained basic demographic information, smoking status and behavioral variables, and death status/year of death reported through 2011. For all derivations below, we excluded those with unknown smoking or mortality status. Only people 18 years of age or older were surveyed about tobacco use, and since ages 85+ years are censored, we excluded those as well.

#### *External validation - mortality*

From the pooled 1997-2009 data, we used the IPUMS-recoded and -constructed survey weights adjusting for differential representation in the smoking sub-sample and NDI follow-up. Because of the NHIS sampling design, weights must be used so that the survey respondents can be collectively expanded to represent the civilian noninstitutionalized population of the US. These weights represent a

1  
2  
3 surveyed individual's inverse probability of being included in both the survey supplement, which  
4  
5 contains questions about smoking, and the NHIS-NDI linked mortality files.  
6  
7  
8  
9

10 Smoking cessation inputs: We derived age- and sex-stratified cessation rates using the NHIS  
11 variable that reported years since respondents (former smokers) quit smoking. We excluded  
12 quit ages before age 16 years (due to perceived inconsistency of coding of the "time since quit"  
13 variable – some entries implied negative quit age) and included quit ages through age 85 years.  
14  
15  
16  
17  
18  
19  
20

21 Smoking initiation inputs: Similarly, we derived initiation rates, also age- and sex-stratified, using  
22 the variable that reported years since the respondent (a current or former smoker) started to  
23 smoke regularly. We used initiation rates from ages 6 to 61 years, the last age for which data are  
24 consecutively available for both women and men.  
25  
26  
27  
28  
29  
30  
31

32 Mortality inputs: We calculated mortality rates by age, sex, smoking status, and five-year age  
33 group using the smoking status variable and NDI reporting through 2011. The rates were  
34 calculated from a follow-up period beginning in the respondent's survey year and ending in  
35 2011 or the year of her/his death, whichever came first. Because smoking behavior data were  
36 collected only at baseline in NHIS and not again at the time of death, there may have been some  
37 misclassification of smoking status (e.g., someone who was a current smoker at the time of NHIS  
38 assessment may have subsequently quit and later died but was still considered a current  
39 smoker). However, all-cause mortality rates do not significantly decrease until a few years after  
40 cessation, and we considered those who had quit smoking to have similar mortality risks to  
41 current smokers until five years of abstinence. This reflects contemporary studies in which  
42 former smokers were defined as those who had not smoked in the previous five years and data  
43  
44  
45  
46  
47  
48  
49  
50  
51  
52  
53  
54  
55  
56  
57  
58  
59  
60

1  
2  
3 from large US cohort studies that indicate that the all-cause mortality risk in men who quit  
4  
5 smoking does not fall below that of current smokers until five years of abstinence.[3,4]  
6  
7  
8  
9

10 Input cohort: We derived initial cohort characteristics for this analysis from the NHIS 1997-2009  
11  
12 pooled dataset: current, former and never smoking prevalence by five-year age group from age  
13  
14 <20 to 84 years; mean (standard deviation [SD]) age adjusted for bounding of the distribution;  
15  
16 sex distribution; and mean (SD) time since quit bounded by a minimum quit age of 16 years.  
17  
18  
19  
20

21 Output comparison: We compared STOP model output for mortality to NHIS/NDI-reported  
22  
23 mortality in the form of mortality rates and cumulative mortality from age 20 years.  
24  
25  
26  
27

#### 28 *External validation – smoking prevalence*

29  
30 From the NHIS 1997 data, using the same survey weights as above:  
31  
32  
33

34 Smoking cessation, smoking initiation, and mortality inputs: We used the same cessation,  
35  
36 initiation, and mortality rate inputs as for the mortality validation.  
37  
38  
39  
40

41 Input cohort: We derived input cohort characteristics for this analysis from the 1997 NHIS data:  
42  
43 current, former, and never smoking prevalence by five-year age group from age <20 to 84 years;  
44  
45 mean (SD) age adjusted for bounding of the distribution; sex distribution; and mean (SD) time  
46  
47 since quit bounded by a minimum quit age of 16 years.  
48  
49  
50  
51  
52  
53  
54  
55  
56  
57

1  
2  
3 Output comparison: Starting with the 1997 NHIS respondents and following them each year  
4  
5 from 1998 to 2009, we compared STOP projections to NHIS data regarding prevalence of  
6  
7 current, former, and never smokers by five-year age group from age 30 to 84 years.  
8  
9  
10  
11  
12  
13  
14  
15  
16  
17  
18  
19  
20  
21  
22  
23  
24  
25  
26  
27  
28  
29  
30  
31  
32  
33  
34  
35  
36  
37  
38  
39  
40  
41  
42  
43  
44  
45  
46  
47  
48  
49  
50  
51  
52  
53  
54  
55  
56  
57  
58  
59  
60

For peer review only

## REFERENCES IN SUPPLEMENT

- 1 Centers for Disease Control and Prevention. National Health Interview Survey. Adult tobacco use - major changes. [https://www.cdc.gov/nchs/nhis/tobacco/tobacco\\_changes.htm](https://www.cdc.gov/nchs/nhis/tobacco/tobacco_changes.htm) (accessed 9 Jan 2020).
- 2 Blewett LA, Rivera Drew JA, Griffin R, et al. *IPUMS Health Surveys: National Health Interview Survey, Version 6.3 [dataset]*. Minneapolis, MN: IPUMS. <https://nhis.ipums.org> (accessed 9 Jan 2020).
- 3 Thun MJ, Carter BD, Feskanich D, et al. 50-year trends in smoking-related mortality in the United States. *N Engl J Med* 2013;**368**:351–64. doi:10.1056/NEJMsa1211127
- 4 Jha P, Ramasundarahettige C, Landsman V, et al. 21st-century hazards of smoking and benefits of cessation in the United States. *N Engl J Med* 2013;**368**:341–50. doi:10.1056/NEJMsa1211128
- 5 Tonstad S, Tønnesen P, Hajek P, et al. Effect of maintenance therapy with varenicline on smoking cessation: a randomized controlled trial. *JAMA* 2006;**296**:64–71. doi:10.1001/jama.296.1.64
- 6 Brendryen H, Kraft P. Happy Ending: a randomized controlled trial of a digital multi-media smoking cessation intervention. *Addiction* 2008;**103**:478–84. doi:10.1111/j.1360-0443.2007.02119.x
- 7 Bullen C, Howe C, Laugesen M, et al. Electronic cigarettes for smoking cessation: a randomised controlled trial. *Lancet* 2013;**382**:1629–37. doi:10.1016/S0140-6736(13)61842-5
- 8 Hughes JR, Keely J, Naud S. Shape of the relapse curve and long-term abstinence among untreated smokers. *Addiction* 2004;**99**:29–38. doi:10.1111/j.1360-0443.2004.00540.x



**Supplementary Table 1. Examples of transition probabilities in the simulation model.**

| Parameter                                                                                                                   | Value                                       | Reference                               |
|-----------------------------------------------------------------------------------------------------------------------------|---------------------------------------------|-----------------------------------------|
| Smoking initiation probability,<br>monthly, by age and sex                                                                  | 0-0.0063                                    | Derived from NHIS<br>1997-2009 data     |
| Cessation probability, monthly,<br>by age and sex                                                                           | 0-0.035                                     | Derived from NHIS<br>1997-2009 data     |
| Relapse probability, monthly,<br>by time since cessation                                                                    | $P_{\text{Relapse}} = 0.62 * e^{-0.33 * t}$ | [5–8]                                   |
| Never Smoker mortality probability,<br>monthly, by age and sex, x 10 <sup>-4</sup>                                          | 0.4-95.2                                    | Derived from NHIS/NDI<br>1997-2009 data |
| Current Smoker or Recent Quitter<br>mortality probability, monthly, by<br>age and sex, x 10 <sup>-4</sup>                   | 0.4-136.1                                   | Derived from NHIS/NDI<br>1997-2009 data |
| Former Smoker mortality<br>probability, monthly, by age, sex,<br>and time since cessation <sup>a</sup> , x 10 <sup>-4</sup> | 0-111.5                                     | Derived from NHIS/NDI<br>1997-2009 data |
| Time to transition from Recent<br>Quitter to Former Smoker                                                                  | 5 years <sup>b</sup>                        | Assumption, [3,4]                       |

NHIS: National Health Interview Survey. NDI: National Death Index. STOP: Simulation of Tobacco and Nicotine Outcomes and Policy.

<sup>a</sup>These former smoker mortality probabilities were used only in the external validation exercises, comparing STOP model output to NHIS/NDI results. In cross-validation comparing STOP model output to

1  
2  
3 the CISNET model results, we applied multipliers to never smoker mortality rates to derive former  
4  
5 smoker mortality rates and then converted these to probabilities.  
6  
7  
8  
9

10 <sup>b</sup>This five-year abstinence period was based on data showing mortality risks by years since smoking  
11  
12 cessation.[3,4] We performed an analysis in which we assumed that mortality risks decreased to  
13  
14 “Former Smoker” levels immediately upon quitting smoking, but the model-generated results were not  
15  
16 a better fit to NHIS data (results not shown).  
17  
18  
19  
20  
21  
22  
23  
24  
25  
26  
27  
28  
29  
30  
31  
32  
33  
34  
35  
36  
37  
38  
39  
40  
41  
42  
43  
44  
45  
46  
47  
48  
49  
50  
51  
52  
53  
54  
55  
56  
57  
58  
59  
60

**Supplementary Table 2. Selected age- and sex-specific annual mortality rates: STOP model output versus NHIS-derived mortality.**

| <b>Women</b>            |                |          |               |          |              |          |
|-------------------------|----------------|----------|---------------|----------|--------------|----------|
|                         | Current Smoker |          | Former Smoker |          | Never Smoker |          |
| <b>Age group, years</b> | STOP           | NHIS/NDI | STOP          | NHIS/NDI | STOP         | NHIS/NDI |
| 40-44                   | 0.0023         | 0.0023   | 0.0017        | 0.0015   | 0.0012       | 0.0012   |
| 50-54                   | 0.0071         | 0.0071   | 0.0035        | 0.0029   | 0.0025       | 0.0025   |
| 60-64                   | 0.0147         | 0.0146   | 0.0087        | 0.0079   | 0.0051       | 0.0051   |
| <b>Men</b>              |                |          |               |          |              |          |
|                         | Current Smoker |          | Former Smoker |          | Never Smoker |          |
| <b>Age group, years</b> | STOP           | NHIS/NDI | STOP          | NHIS/NDI | STOP         | NHIS/NDI |
| 40-44                   | 0.0031         | 0.0034   | 0.0028        | 0.0025   | 0.0018       | 0.0018   |
| 50-54                   | 0.0094         | 0.0096   | 0.0059        | 0.0053   | 0.0042       | 0.0043   |
| 60-64                   | 0.0233         | 0.0232   | 0.0114        | 0.0099   | 0.0067       | 0.0066   |

STOP: Simulation of Tobacco and Nicotine Outcomes and Policy. NHIS: National Health Interview Survey.

NDI: National Death Index.

1 **Supplementary Figure 1. Smoking status by age group and sex in 1997: STOP model inputs for the external validation exercise of smoking**  
 2 **prevalence.**

**A**

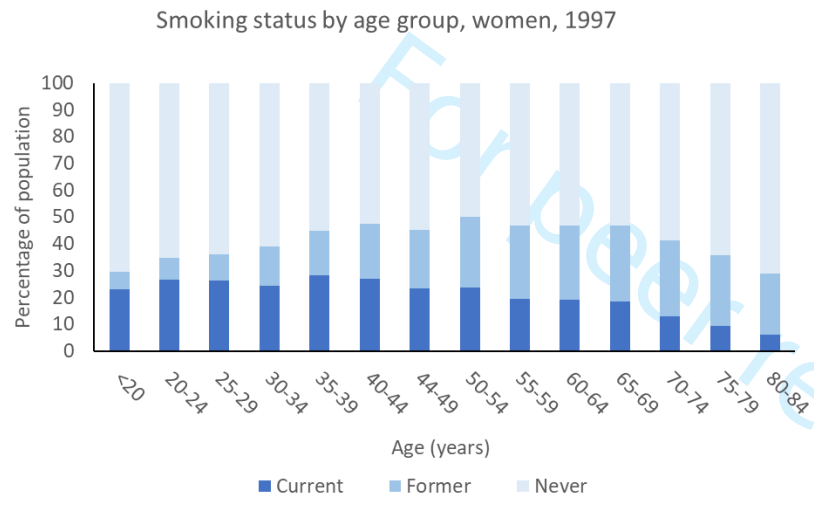

**B**

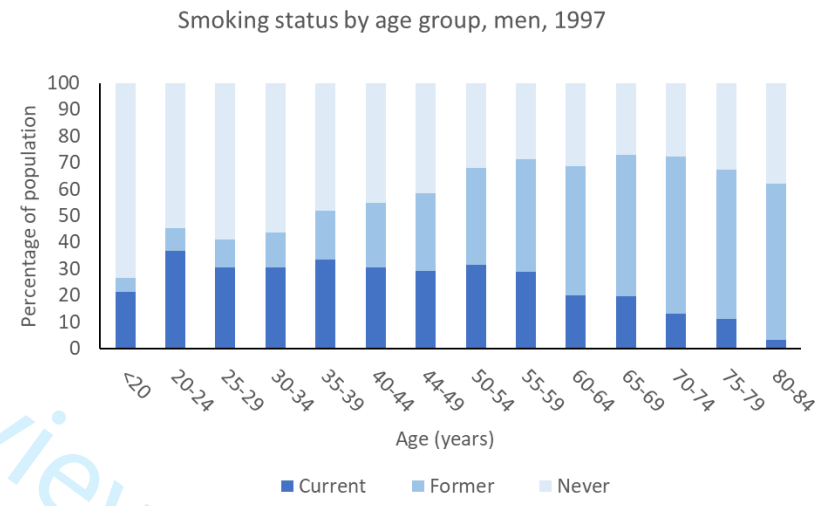

3  
 4 STOP: Simulation of Tobacco and Nicotine Outcomes and Policy. NHIS: National Health Interview Survey.  
 5  
 6 Panel A depicts women; Panel B depicts men. For each age group, the prevalence of current, former, and never smokers is entered as STOP  
 7 model input. The external validation analysis of smoking prevalence, using weighted NHIS 1997 survey respondent data as inputs, projects  
 8 smoking prevalence annually from 1998 to 2009.

10 **Supplementary Figure 2. External validation: STOP model results and NHIS results for prevalence of current, former, and never smokers each**  
 11 **year from 1998 to 2009.**

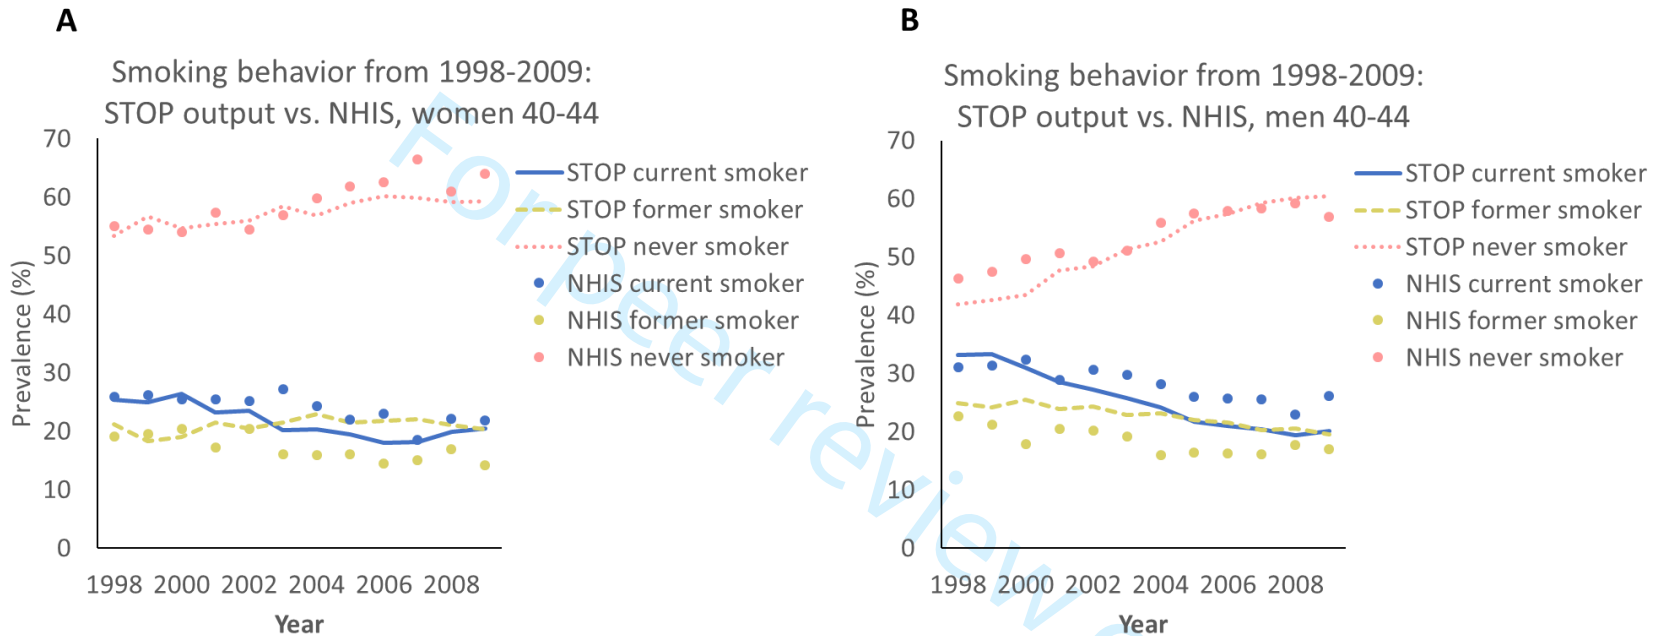

12  
 13 STOP: Simulation of Tobacco and Nicotine Outcomes and Policy. NHIS: National Health Interview Survey. NDI: National Death Index.

14  
 15 Panel A depicts women, Panel B depicts men. The STOP model cohort had the age and smoking status distribution of the 1997 NHIS survey  
 16 respondents (Supplementary Figure 1). The STOP-generated results reflect a microsimulation that included probabilities of smoking initiation,  
 17 smoking cessation, smoking relapse, and mortality.

18 **Supplementary Figure 3. Two-way sensitivity analysis of smoking initiation and smoking cessation multipliers for external validation exercise.**



19

20 STOP: Simulation of Tobacco and Nicotine Outcomes and Policy. NHIS: National Health Interview Survey. CV-RMSE: coefficient of variation of

21 root-mean-square error.

1  
2  
3 23 Panel A depicts women; Panel B depicts men. The multipliers were applied to the original cessation and initiation rates derived from pooled  
4  
5 24 1997-2009 NHIS data and used in the STOP model. The horizontal axis shows the multiplier applied to smoking initiation rates (subsequently  
6  
7  
8 25 converted to probabilities) in the STOP model, and the vertical axis shows the multiplier applied to smoking cessation rates (subsequently  
9  
10 26 converted to probabilities). Colored cells represent the CV-RMSE of STOP model-generated versus NHIS-reported current smoking prevalence  
11  
12 27 among people ages 30-84 years from 1998 to 2009.  
13  
14  
15  
16  
17  
18  
19  
20  
21  
22  
23  
24  
25  
26  
27  
28  
29  
30  
31  
32  
33  
34  
35  
36  
37  
38  
39  
40  
41  
42  
43  
44  
45  
46  
47

# BMJ Open

## A novel microsimulation model of tobacco use behaviors and outcomes: calibration and validation in a US population

|                                 |                                                                                                                                                                                                                                                                                                                                                                                                                                                                                                                                                                                                                                                                                                                                                                                                                                                                                                                                                                                                                                                                                                                                     |
|---------------------------------|-------------------------------------------------------------------------------------------------------------------------------------------------------------------------------------------------------------------------------------------------------------------------------------------------------------------------------------------------------------------------------------------------------------------------------------------------------------------------------------------------------------------------------------------------------------------------------------------------------------------------------------------------------------------------------------------------------------------------------------------------------------------------------------------------------------------------------------------------------------------------------------------------------------------------------------------------------------------------------------------------------------------------------------------------------------------------------------------------------------------------------------|
| Journal:                        | <i>BMJ Open</i>                                                                                                                                                                                                                                                                                                                                                                                                                                                                                                                                                                                                                                                                                                                                                                                                                                                                                                                                                                                                                                                                                                                     |
| Manuscript ID                   | bmjopen-2019-032579.R2                                                                                                                                                                                                                                                                                                                                                                                                                                                                                                                                                                                                                                                                                                                                                                                                                                                                                                                                                                                                                                                                                                              |
| Article Type:                   | Original research                                                                                                                                                                                                                                                                                                                                                                                                                                                                                                                                                                                                                                                                                                                                                                                                                                                                                                                                                                                                                                                                                                                   |
| Date Submitted by the Author:   | 02-Mar-2020                                                                                                                                                                                                                                                                                                                                                                                                                                                                                                                                                                                                                                                                                                                                                                                                                                                                                                                                                                                                                                                                                                                         |
| Complete List of Authors:       | Reddy, Krishna; Massachusetts General Hospital, Medical Practice Evaluation Center<br>Bulteel, Alexander; Massachusetts General Hospital, Medical Practice Evaluation Center<br>Levy, Douglas; Massachusetts General Hospital<br>Torola, Pamela; Massachusetts General Hospital, Medical Practice Evaluation Center<br>Hyle, Emily; Massachusetts General Hospital, Medical Practice Evaluation Center<br>Hou, Taige; Massachusetts General Hospital, Medical Practice Evaluation Center<br>Osher, Benjamin; Massachusetts General Hospital, Medical Practice Evaluation Center<br>Yu, Liyang; Massachusetts General Hospital, Medical Practice Evaluation Center<br>Shebl, Fatma; Massachusetts General Hospital, Medical Practice Evaluation Center<br>Paltiel, A David; Yale University School of Public Health<br>Freedberg, Kenneth; Massachusetts General Hospital, Medical Practice Evaluation Center<br>Weinstein, Milton ; Harvard University T H Chan School of Public Health<br>Rigotti, Nancy; Massachusetts General Hospital<br>Walensky, Rochelle; Massachusetts General Hospital, Medical Practice Evaluation Center |
| <b>Primary Subject Heading</b>: | Public health                                                                                                                                                                                                                                                                                                                                                                                                                                                                                                                                                                                                                                                                                                                                                                                                                                                                                                                                                                                                                                                                                                                       |
| Secondary Subject Heading:      | Addiction, Epidemiology, Health policy, Health services research, Research methods                                                                                                                                                                                                                                                                                                                                                                                                                                                                                                                                                                                                                                                                                                                                                                                                                                                                                                                                                                                                                                                  |
| Keywords:                       | tobacco, nicotine, model, validation, calibration, relapse                                                                                                                                                                                                                                                                                                                                                                                                                                                                                                                                                                                                                                                                                                                                                                                                                                                                                                                                                                                                                                                                          |
|                                 |                                                                                                                                                                                                                                                                                                                                                                                                                                                                                                                                                                                                                                                                                                                                                                                                                                                                                                                                                                                                                                                                                                                                     |

SCHOLARONE™  
Manuscripts





I, the Submitting Author has the right to grant and does grant on behalf of all authors of the Work (as defined in the below author licence), an exclusive licence and/or a non-exclusive licence for contributions from authors who are: i) UK Crown employees; ii) where BMJ has agreed a CC-BY licence shall apply, and/or iii) in accordance with the terms applicable for US Federal Government officers or employees acting as part of their official duties; on a worldwide, perpetual, irrevocable, royalty-free basis to BMJ Publishing Group Ltd ("BMJ") its licensees and where the relevant Journal is co-owned by BMJ to the co-owners of the Journal, to publish the Work in this journal and any other BMJ products and to exploit all rights, as set out in our [licence](#).

The Submitting Author accepts and understands that any supply made under these terms is made by BMJ to the Submitting Author unless you are acting as an employee on behalf of your employer or a postgraduate student of an affiliated institution which is paying any applicable article publishing charge ("APC") for Open Access articles. Where the Submitting Author wishes to make the Work available on an Open Access basis (and intends to pay the relevant APC), the terms of reuse of such Open Access shall be governed by a Creative Commons licence – details of these licences and which [Creative Commons](#) licence will apply to this Work are set out in our licence referred to above.

Other than as permitted in any relevant BMJ Author's Self Archiving Policies, I confirm this Work has not been accepted for publication elsewhere, is not being considered for publication elsewhere and does not duplicate material already published. I confirm all authors consent to publication of this Work and authorise the granting of this licence.

1  
2  
3 **A novel microsimulation model of tobacco use behaviors and outcomes:**  
4  
5 **calibration and validation in a US population**  
6  
7  
8  
9

10 Krishna P. Reddy<sup>1,2,3,7,\*</sup>, Alexander J.B. Bulteel<sup>1</sup>, Douglas E. Levy<sup>2,4,7</sup>, Pamela Torola<sup>1</sup>, Emily P. Hyle<sup>1,6,7</sup>,  
11  
12 Taige Hou<sup>1</sup>, Benjamin Osher<sup>1</sup>, Liyang Yu<sup>1</sup>, Fatma M. Shebl<sup>1,7</sup>, A. David Paltiel<sup>8</sup>,  
13  
14 Kenneth A. Freedberg<sup>1,5,6,7,9</sup>, Milton C. Weinstein<sup>7,9</sup>, Nancy A. Rigotti<sup>2,5,7</sup>, Rochelle P. Walensky<sup>1,5,6,7</sup>  
15

16  
17  
18 <sup>1</sup>Medical Practice Evaluation Center, <sup>2</sup>Tobacco Research and Treatment Center, <sup>3</sup>Division of Pulmonary  
19 and Critical Care Medicine, <sup>4</sup>Mongan Institute Health Policy Research Center, <sup>5</sup>Division of General  
20  
21 Internal Medicine, and <sup>6</sup>Division of Infectious Diseases, Massachusetts General Hospital, Boston, MA,  
22  
23  
24  
25 USA  
26

27  
28  
29  
30 <sup>7</sup>Harvard Medical School, Boston, MA, USA  
31

32  
33  
34 <sup>8</sup>Yale School of Public Health, New Haven, CT, USA  
35

36  
37  
38  
39 <sup>9</sup>Department of Health Policy and Management, Harvard T.H. Chan School of Public Health, Boston, MA,  
40  
41 USA  
42

43  
44  
45 \*Corresponding author:  
46

47 Krishna P. Reddy, MD, MS  
48

49 Medical Practice Evaluation Center  
50

51 Massachusetts General Hospital  
52

53 100 Cambridge Street, Suite 1600  
54  
55  
56  
57

1  
2  
3  
4  
5  
6  
7  
8  
9  
10  
11  
12  
13  
14  
15  
16  
17  
18  
19  
20  
21  
22  
23  
24  
25  
26  
27  
28  
29  
30  
31  
32  
33  
34  
35  
36  
37  
38  
39  
40  
41  
42  
43  
44  
45  
46  
47  
48  
49  
50  
51  
52  
53  
54  
55  
56  
57  
58  
59  
60

Boston, MA 02114

USA

Email: [kpreddy@mgh.harvard.edu](mailto:kpreddy@mgh.harvard.edu)

Phone: +1 617-726-1993

**ABSTRACT WORD COUNT: 300**

**MAIN TEXT WORD COUNT: 3998**

For peer review only

## ABSTRACT

**Background and Objective:** Simulation models can project effects of tobacco use and cessation and inform tobacco control policies. Most existing tobacco models do not explicitly include relapse, a key component of the natural history of tobacco use. Our objective was to develop, calibrate, and validate a novel individual-level microsimulation model that would explicitly include smoking relapse and project cigarette smoking behaviors and associated mortality risks.

**Methods:** We developed the Simulation of Tobacco and Nicotine Outcomes and Policy (STOP) model, in which individuals transition monthly between tobacco use states (current/former/never) depending on rates of initiation, cessation, and relapse. Simulated individuals face tobacco use-stratified mortality risks. For US women and men, we conducted cross-validation with a Cancer Intervention and Surveillance Modeling Network (CISNET) model. We then incorporated smoking relapse and calibrated cessation rates to reflect the difference between a transient quit attempt and sustained abstinence. We performed external validation with the National Health Interview Survey (NHIS) and the linked National Death Index. Comparisons were based on root-mean-square error (RMSE).

**Results:** In cross-validation, STOP-generated projections of current/former/never smoking prevalence fit CISNET-projected data well (coefficient of variation [CV]-RMSE  $\leq 15\%$ ). After incorporating smoking relapse, multiplying the CISNET-reported cessation rates for women/men by 7.75/7.25, to reflect the ratio of quit attempts to sustained abstinence, resulted in the best approximation to CISNET-reported smoking prevalence (CV-RMSE 2%/3%). In external validation using these new multipliers, STOP-generated cumulative mortality curves for 20-year-old current smokers and never smokers each had CV-RMSE  $\leq 1\%$  compared to NHIS. In simulating those surveyed by NHIS in 1997, the STOP-projected

1  
2  
3 prevalence of current/former/never smokers annually (1998-2009) was similar to that reported by NHIS  
4  
5 (CV-RMSE 12%).  
6  
7  
8  
9

10 Conclusions: The STOP model, with relapse included, performed well when validated to US smoking  
11 prevalence and mortality. STOP provides a flexible framework for policy-relevant analysis of tobacco and  
12 nicotine product use.  
13  
14  
15

16  
17  
18  
19 Keywords: tobacco, nicotine, model, validation, calibration, relapse  
20  
21  
22

### 23 **STRENGTHS AND LIMITATIONS OF THIS STUDY**

- 24  
25 • The STOP microsimulation model and our calibration and validation methods capture monthly  
26 individual-level tobacco use behaviors and outcomes, including relapse, a key factor in nicotine  
27 addiction.  
28  
29
- 30  
31 • We validated STOP model results with those of another model and, in a partially dependent manner,  
32 with empirical data.  
33  
34
- 35  
36 • We validated with multiple outcomes, including smoking prevalence and mortality.  
37  
38
- 39  
40 • This analysis did not account for some aspects of heterogeneity in tobacco use behaviors.  
41  
42  
43  
44  
45  
46  
47  
48  
49  
50  
51  
52  
53  
54  
55  
56  
57  
58  
59  
60

## INTRODUCTION

In the US, tobacco smoking reduces life expectancy by over a decade and accounts for over \$200 billion in healthcare costs annually, approximately 9% of all healthcare costs in the country.[1,2] Though the prevalence of cigarette smoking among adults has decreased in the US, from 42% in 1965 to 14% in 2018, the decline has not been seen in all segments of society.[3,4] Meanwhile, tobacco treatment interventions, including behavioral therapy and pharmacotherapy, remain underutilized.[5] Novel tobacco and nicotine products raise many new clinical and policy questions.[6,7] Trial- and cohort-based data to fully inform these questions will not be available for many years. In the meantime, a timely way to address them is via modeling.

Simulation models provide a critical complement to more traditional research approaches.[8–14] Indeed, the Food and Drug Administration and the National Academies of Sciences, Engineering, and Medicine recently called for modeling studies to project the long-term effects, including both potential harms and benefits, of novel tobacco and nicotine products and regulatory policies to address them.[15,16] While multiple model-based studies of tobacco and nicotine products have been published,[17–25] most report aggregate trends, are focused at the population rather than individual level, and do not explicitly account for smoking relapse, a key component of the natural history and resource utilization of smoking cessation attempts. A current challenge of projecting longer-term clinical and economic outcomes of short-term tobacco cessation studies lies in capturing the many smoking quit attempts and relapses.[26,27] A new model that intentionally examines relapse would extend trial results by projecting outcomes beyond the time horizon of trials, when many relapses occur. Our objective was to develop, calibrate, and validate a novel, individual-level microsimulation model that directly addresses the mechanics of smoking initiation, cessation, and relapse, and the associated clinical

1  
2  
3  
4  
5  
6  
7  
8  
9  
10  
11  
12  
13  
14  
15  
16  
17  
18  
19  
20  
21  
22  
23  
24  
25  
26  
27  
28  
29  
30  
31  
32  
33  
34  
35  
36  
37  
38  
39  
40  
41  
42  
43  
44  
45  
46  
47  
48  
49  
50  
51  
52  
53  
54  
55  
56  
57  
58  
59  
60

outcomes. The intended applications of the model include projecting the downstream impact of clinical and public health policy decisions and informing the design of tobacco treatment trials.

For peer review only

## METHODS

### Analytic overview

We developed a microsimulation model of tobacco- and nicotine-related behaviors, clinical outcomes, and treatments: the Simulation of Tobacco and Nicotine Outcomes and Policy (STOP) model. In this analysis, we focused on cigarette smoking among US women and men to demonstrate that the STOP model, in simulating individuals' month-by-month smoking behaviors, can match historical smoking prevalence and mortality data. Our methods included: 1) performing internal validation to ensure the accuracy of the mathematical calculations; 2) conducting cross-validation with another model; 3) incorporating smoking relapse and then calibrating smoking cessation probabilities to reflect the difference between a quit attempt and sustained abstinence; and 4) using our new relapse parameters, performing external validation to compare model outputs for mortality and for prevalence of current, former, and never smokers over time to empirical data from the National Health Interview Survey (NHIS) (table 1).

**Table 1. Characteristics of cross-validation and external validation analyses for a new microsimulation model of smoking behaviors and outcomes.**

| Analysis                      | STOP-generated output of interest                                                           | Comparator                                                                                                 | Measure of goodness of fit |
|-------------------------------|---------------------------------------------------------------------------------------------|------------------------------------------------------------------------------------------------------------|----------------------------|
| Cross-validation <sup>a</sup> | 1950 birth cohort prevalence of never, current, and former smokers, ages 0-70 years, by sex | CISNET-modeled 1950 birth cohort prevalence of never, current, and former smokers, ages 0-70 years, by sex | RMSE                       |



1  
2  
3  
4  
5  
6  
7  
8  
9  
10  
11  
12  
13  
14  
15  
16  
17  
18  
19  
20  
21  
22  
23  
24  
25  
26  
27  
28  
29  
30  
31  
32  
33  
34  
35  
36  
37  
38  
39  
40  
41  
42  
43  
44  
45  
46  
47  
48  
49  
50  
51  
52  
53  
54  
55  
56  
57  
58  
59  
60

## Mortality rates of 1997-2009

|                                            |                                                                             |                                                                                  |                  |
|--------------------------------------------|-----------------------------------------------------------------------------|----------------------------------------------------------------------------------|------------------|
| External validation:<br>mortality          | Cumulative mortality by age,<br>sex, and smoking status                     | NHIS respondents by age, sex,<br>and smoking status, and<br>cumulative mortality | MAPE and<br>RMSE |
| External validation:<br>smoking prevalence | Prevalence of never, current,<br>and former smokers, annually,<br>1998-2009 | NHIS never, current, and<br>former smoking prevalence,<br>annually, 1998-2009    | RMSE             |

STOP: Simulation of Tobacco and Nicotine Outcomes and Policy model. CISNET: Cancer Intervention and Surveillance Monitoring Network. NHIS: National Health Interview Survey. RMSE: root-mean-square error. MAPE: mean absolute percentage error. <sup>a</sup>The initial cross-validation did not include smoking relapse. In the subsequent calibration step, we incorporated smoking relapse and calibrated cessation to achieve a good fit to the CISNET-modeled 1950 birth cohort prevalence of never, current, and former smokers.

Because there is no consensus criterion by which to compare model-generated results to surveillance data, expert guidance suggests choosing a criterion appropriate for the model structure and data sources.[28] Similar to methods used in validating other models, we chose root-mean-square error (RMSE, for cumulative risks and time-varying prevalence estimates) and mean absolute percentage error (MAPE, for mortality rates) to evaluate the goodness-of-fit between STOP model results and data sources.[28–34] We applied the coefficient of variation of RMSE (CV-RMSE) as a relative measure of error.

### Smoking definitions

Similar to NHIS and the Cancer Intervention and Surveillance Modeling Network (CISNET, which used NHIS data), we defined Never Smokers as those who had smoked <100 cigarettes in their lifetime.[35–37] Among others (ever smokers), NHIS defined current smokers as those who reported currently smoking every day or some days. NHIS considered ever smokers who reported no smoking at the time of interview to be former smokers, regardless of the duration of abstinence. CISNET considered former smokers to be those who had quit smoking at least two years prior to interview; those with a shorter period of abstinence were still considered current smokers.

To better distinguish relapse and mortality risks among those with short-term or long-term abstinence, the STOP model includes three states for those who have ever smoked: 1) Current Smoker; 2) Recent Quitter (short-term abstinence); 3) Former Smoker (long-term abstinence) (figure 1). This enables a differentiation between: 1) transient quit attempts: transition from the Current Smoker state to the Recent Quitter state, with a relatively high rate of early relapse back to the Current Smoker state; and 2) sustained abstinence: transition from the Recent Quitter state to the Former Smoker state, with a lower rate of later relapse back to the Current Smoker state.

### STOP model structure

STOP is an individual-level Monte Carlo microsimulation.[38,39] An individual enters the model with age and smoking status defined by random realizations from specified probability distributions. STOP follows a state-transition framework: individuals transition monthly through various cigarette smoking states (figure 1). Transitions between these states depend on age- and sex-stratified monthly smoking initiation and cessation probabilities. Ex-smokers have monthly relapse probabilities (figure 1). Monthly mortality probabilities depend on age, sex, and smoking status. Those who quit smoking retain the all-

1  
2  
3 cause mortality probabilities of current smokers until maintaining abstinence for a defined period of  
4  
5 time, after which the mortality probabilities decline.[1,8,40]  
6  
7  
8  
9

10 Individuals are simulated in series: for each simulated person, the model tracks smoking behavioral  
11  
12 events (smoking initiation, quit attempt, relapse) and the duration spent in each smoking state. Upon an  
13  
14 individual's death, the next simulated person enters the model. Once a cohort large enough to attain  
15  
16 stable estimates has been simulated, summary statistics are calculated, including mean number of quit  
17  
18 attempts, life expectancy, and the monthly prevalence of never, current, and former smokers. For the  
19  
20 purpose of model output displays, those in the Recent Quitter state are considered "former smokers."  
21  
22  
23 We use a constant simulated population size of one million to obtain stable estimates of these  
24  
25 "average" outcomes of interest.  
26  
27  
28  
29

### 30 **Internal validation**

31  
32 We conducted internal model validation by comparing model outputs to expected results and by  
33  
34 conducting sensitivity analysis.  
35  
36  
37  
38

### 39 **Cross-validation**

#### 40 *Overview and outcome comparisons*

41  
42 We conducted cross-validation by simulating the US population born in 1950, following them monthly  
43  
44 until 2020, and then comparing STOP results to those from CISNET modeling studies (table 1 and  
45  
46 supplementary text).[28] We selected the 1950 birth cohort because smoking prevalence in the US  
47  
48 peaked in the 1960s, which was the smoking initiation period (adolescence) for these individuals, and  
49  
50 data collection frequency increased concurrently. We compared STOP-generated results to CISNET-  
51  
52  
53  
54  
55  
56  
57  
58  
59  
60

1  
2  
3 reported results for the prevalence of female and male current, former, and never smokers over  
4  
5 time.[40]  
6  
7  
8  
9

10 We used CV-RMSE to assess the goodness-of-fit of the six sets of prevalence curves.[29,32] First, RMSE  
11  
12 was calculated as the square root of the average of the squared difference between STOP-projected  
13  
14 prevalence and CISNET-projected prevalence at each year of age. Then, we calculated CV-RMSE by  
15  
16 dividing RMSE by mean modeled prevalence, representing the relative error.  
17  
18  
19  
20

### 21 *CISNET Model*

22  
23 CISNET is a collaboration of National Cancer Institute-supported investigators modeling the impact of  
24  
25 interventions on population incidence and mortality of various types of cancer, including lung cancer.  
26  
27 The Yale CISNET-Lung models, for subsequent analyses of cancer care interventions, used data from  
28  
29 NHIS to generate detailed smoking initiation and cessation rates, stratified by birth year, age, and sex,  
30  
31 and mortality rates, stratified by birth year, age, sex, and smoking status.[37,41]  
32  
33  
34  
35  
36

### 37 *Input parameters for initial cross-validation*

38  
39 For the initial cross-validation exercise, we used data from CISNET modeling studies, which were derived  
40  
41 from NHIS through 2009 and were stratified by birth cohort (table 2).[37,41] Specifically, we used  
42  
43 CISNET age- and sex-stratified smoking initiation and cessation rates and smoking-stratified mortality  
44  
45 rates among US women and men born in 1950, converting them to monthly probabilities. The CISNET  
46  
47 smoking cessation rates reflected a direct transition from current smoker to former smoker after at least  
48  
49 two years of sustained abstinence.[41] This initial exercise used the same input parameters as CISNET  
50  
51 and did not include smoking relapse.  
52  
53  
54  
55  
56  
57  
58  
59  
60

**Table 2. STOP model input parameters applied in each validation exercise.**

| Input parameter                                                                                                                                                                 | Cross-validation            | External validation<br>of mortality | External validation<br>of smoking<br>prevalence |
|---------------------------------------------------------------------------------------------------------------------------------------------------------------------------------|-----------------------------|-------------------------------------|-------------------------------------------------|
| <b>Input parameters from CISNET (for cross-validation), NHIS 1997-2009 (for external validation of mortality), or NHIS 1997 (for external validation of smoking prevalence)</b> |                             |                                     |                                                 |
| Baseline cohort characteristics                                                                                                                                                 |                             |                                     |                                                 |
| Women/Men, % <sup>a</sup>                                                                                                                                                       | ---                         | 52/48                               | 52/48                                           |
| Initial age, mean, years (SD)                                                                                                                                                   | 0 (followed a birth cohort) | 39.7 (21.4)                         | 39.1 (20.7)                                     |
| Minimum/maximum age, years                                                                                                                                                      | ---                         | 18/84                               | 18/84                                           |
| Initial prevalence of                                                                                                                                                           |                             |                                     |                                                 |
| never/current/former smokers <sup>b</sup> , %                                                                                                                                   | 100/0/0                     | 56/22/22                            | 52/25/23                                        |
| Years since cessation among former smokers, mean (SD)                                                                                                                           | ---                         | 15.6 (12.7)                         | 14.4 (11.9)                                     |
| Smoking behavior events <sup>c</sup>                                                                                                                                            |                             |                                     |                                                 |
| Monthly smoking initiation probability, by age and sex                                                                                                                          | 0-0.0093                    | 0-0.0063                            | 0-0.0063                                        |
| Monthly smoking cessation probability, by age and sex                                                                                                                           | 0-0.015                     | 0-0.035                             | 0-0.035                                         |
| Mortality                                                                                                                                                                       |                             |                                     |                                                 |

|    |                                              |                    |           |           |
|----|----------------------------------------------|--------------------|-----------|-----------|
| 1  | Monthly mortality probability <sup>d</sup> , |                    |           |           |
| 2  | by age and sex, x 10 <sup>-4</sup>           |                    |           |           |
| 3  |                                              |                    |           |           |
| 4  |                                              |                    |           |           |
| 5  |                                              |                    |           |           |
| 6  |                                              |                    |           |           |
| 7  | Never smokers                                | 0-12.8             | 0.4-95.2  | 0.4-95.2  |
| 8  |                                              |                    |           |           |
| 9  | Current smokers                              | 0-34.6             | 0.4-136.1 | 0.4-136.1 |
| 10 |                                              |                    |           |           |
| 11 |                                              |                    |           |           |
| 12 |                                              | Multiplier applied |           |           |
| 13 | Former smokers                               |                    | 0-111.5   | 0-111.5   |
| 14 |                                              | (see last row)     |           |           |
| 15 |                                              |                    |           |           |

### Input parameters derived from smoking studies or from authors' calibration

|    |                                          |                                             |                                             |                                             |
|----|------------------------------------------|---------------------------------------------|---------------------------------------------|---------------------------------------------|
| 16 | Monthly relapse probability <sup>e</sup> |                                             |                                             |                                             |
| 17 | (t = months since cessation)             | $P_{\text{Relapse}} = 0.62 * e^{-0.33 * t}$ | $P_{\text{Relapse}} = 0.62 * e^{-0.33 * t}$ | $P_{\text{Relapse}} = 0.62 * e^{-0.33 * t}$ |
| 18 |                                          |                                             |                                             |                                             |
| 19 | Cessation rate multiplier                |                                             |                                             |                                             |
| 20 | (calibrated), women/men                  | 7.75/7.25                                   | 7.75/7.25                                   | 7.5/7                                       |
| 21 |                                          |                                             |                                             |                                             |
| 22 | Initiation rate multiplier               |                                             |                                             |                                             |
| 23 | (calibrated), women/men                  | ---                                         | ---                                         | 0.9/1.0                                     |
| 24 |                                          |                                             |                                             |                                             |
| 25 | Former smoker mortality                  |                                             |                                             |                                             |
| 26 | multiplier, applied to never             |                                             |                                             |                                             |
| 27 | smoker mortality, by sex                 | 1.0-2.2                                     | ---                                         | ---                                         |
| 28 | and age at quit <sup>f</sup>             |                                             |                                             |                                             |

STOP: Simulation of Tobacco and Nicotine Outcomes and Policy. CISNET: Cancer Intervention and Surveillance Modeling Network. NHIS: National Health Interview Survey. SD: standard deviation. The numbers show model input parameters applied in cross-validation (left column), external validation of mortality (center column), and external validation of smoking prevalence (right column).

<sup>a</sup>In cross-validation, we simulated cohorts of either all women or all men from birth. Thus, no distributions of initial age are displayed.

<sup>b</sup>Prevalence of each smoking status displayed here is the mean over all strata, but in the model these were stratified by 5-year age group and sex from ages 18 to 84.

<sup>c</sup>Additional details about smoking behavior transitions are in supplementary table 1.

<sup>d</sup>Additional details about mortality data are in supplementary table 2.

<sup>e</sup>This is based on relapse probabilities reported in smoking cessation intervention trials, focusing on placebo arms.[42–45]

<sup>f</sup>For the 1950 birth cohort, some CISNET-derived former smoker mortality rates are lower than CISNET-derived never smoker mortality rates – a counterintuitive relationship otherwise unexplained. We therefore adapted former smoker mortality multipliers for the cross-validation from Thun et al.[40]

### *Incorporating smoking relapse and calibrating cessation probabilities*

The STOP model specifically includes smoking relapse, critical to projecting both short-term and long-term impacts of smoking cessation interventions and novel tobacco and nicotine products.

Following the initial cross-validation of the STOP model (without relapse), we added smoking relapse probabilities and then recalibrated the model by adjusting the previously-applied smoking cessation probabilities. First, we modeled relapse as an exponential decay function of time since quit, such that the highest risk of relapse was in the first month after a quit attempt. The coefficient and time constant

1  
2  
3 are based on relapse probabilities in smoking cessation trials (table 2).[42–45] Second, we calibrated the  
4  
5 previously-applied cessation probabilities (derived from CISNET cessation data) by a multiplier to reflect:  
6  
7 1) a quit attempt rather than sustained abstinence; and 2) the higher likelihood of making a quit attempt  
8  
9 rather than attaining sustained abstinence in a given month. This multiplier represents the average  
10  
11 number of quit attempts, lasting at least one month, prior to attaining sustained abstinence. We  
12  
13 compared our multipliers to published data on the average number of quit attempts required to attain  
14  
15 sustained abstinence.[27] Our overall aim for this calibration step was to identify a STOP-generated  
16  
17 current smoker prevalence curve with an RMSE <0.01 compared to the CISNET model-generated current  
18  
19 smoker prevalence curve, similar to previously described methods.[32]  
20  
21  
22  
23  
24

## 25 **External validation**

### 26 *Overview and outcome comparisons*

27  
28 For external validation, we compared STOP model results to NHIS data.[28,36] We accounted for  
29  
30 smoking initiation, smoking cessation, and mortality. Because NHIS data do not explicitly report relapse,  
31  
32 we incorporated smoking relapse and the best-fitting cessation multipliers found in the cross-validation  
33  
34 calibration step. We compared two outcomes: mortality and smoking prevalence (table 1 and  
35  
36 supplementary text).  
37  
38  
39  
40  
41  
42

43 First, to project and validate mortality outcomes, we simulated the population surveyed by NHIS from  
44  
45 1997 through 2009 (supplementary text). To compare STOP-generated mortality rates to those derived  
46  
47 from NHIS – stratified by age, sex, and smoking status – we used MAPE, the mean absolute value of the  
48  
49 percent difference between STOP and NHIS values. We also produced curves of cumulative mortality  
50  
51 from STOP-generated results and from NHIS data, stratified by sex and by current/never smoking status.  
52  
53 These curves reflect 20-year-old current smokers who continue to smoke until death or 20-year-old  
54  
55  
56  
57  
58  
59  
60



1  
2  
3 never smokers who never start smoking. We compared the four sets of cumulative mortality curves by  
4  
5 RMSE and CV-RMSE (STOP versus NHIS) from age 20 years until age 84 years (goal RMSE <0.01). We did  
6  
7 not generate mortality curves for 20-year-old former smokers because mortality risks for those who  
8  
9 stop smoking prior to age 20 are similar to those of never smokers.[1] Also, mortality risks depend on  
10  
11 age at cessation, and at older ages this heterogeneous group would include people who quit smoking at  
12  
13 a variety of ages.[1,40]  
14  
15

16  
17  
18  
19 Second, with those surveyed by NHIS in 1997 as the input cohort, we used the STOP model to project  
20  
21 the prevalence of current, former, and never smokers each year from 1998 to 2009. In a two-way  
22  
23 sensitivity analysis, we re-calibrated cessation multipliers and initiation multipliers with the goal of  
24  
25 identifying multipliers that would minimize the CV-RMSE of STOP-reported current smoker prevalence  
26  
27 compared to NHIS current smoker prevalence. The initiation multipliers were applied to smoking  
28  
29 initiation rates for never smokers. We then compared the cessation multipliers from this step with those  
30  
31 from the cross-validation calibration step.  
32  
33

### 34 35 36 37 *Input parameters*

38  
39 Initial distributions of age, sex, and smoking status for the population simulated in the external  
40  
41 validation exercises came from two sources: aggregated 1997-2009 NHIS data for the mortality external  
42  
43 validation, and 1997 NHIS data for the smoking prevalence external validation (table 2 and  
44  
45 supplementary figure 1). We obtained NHIS data in aggregate for years 1997-2009 from the Integrated  
46  
47 Public Use Microdata Series.[35] We used NHIS data through 2009 because those were the data used in  
48  
49 the CISNET studies, which were our comparator in cross-validation exercises.[37,41] These data  
50  
51 provided initial distributions of smoking status and years of abstinence for former smokers (to inform  
52  
53 relapse risks). From these 1997-2009 NHIS data, we derived age- and sex-specific smoking initiation and  
54  
55  
56  
57

1  
2  
3 cessation rates using self-reported age at initiation and age at cessation variables (supplementary table  
4  
5 1). As in our cross-validation exercises, we converted the cessation rates to quit attempt rates by  
6  
7 incorporating relapse rates and cessation multipliers.  
8  
9

10  
11  
12 The NHIS data included linked National Death Index (NDI) mortality outcomes through 2011 for  
13  
14 respondents for whom mortality data were available. We calculated mortality rates by age, sex, and  
15  
16 smoking status of the same NHIS respondents (supplementary table 1).  
17  
18

### 19 20 21 **Patient and public involvement**

22  
23 We did not involve patients or the public in our work.  
24  
25

### 26 27 28 **Ethics statement**

29  
30 This study was approved by the Partners Human Research Committee (2019P001772).  
31  
32  
33  
34  
35  
36  
37  
38  
39  
40  
41  
42  
43  
44  
45  
46  
47  
48  
49  
50  
51  
52  
53  
54  
55  
56  
57  
58  
59  
60

## RESULTS

### Cross-validation

#### *Initial cross-validation, without relapse*

The STOP-projected prevalence of current, former, and never smokers over time fit CISNET-projected data well for the 1950 birth cohort in the US (figure 2, blue line vs. red dotted line, RMSE <0.03, CV-RMSE 15%/7% for women/men). The STOP-estimated prevalence of current smokers at age 25 years, approaching peak prevalence for the 1950 birth cohort, was 40% for women and 54% for men, compared to CISNET estimates of 38% and 52%.

#### *Incorporating smoking relapse and calibrating cessation probabilities*

After incorporating smoking relapse, the prevalence of current smokers far exceeded that reported by the CISNET model, as expected since many of those who would have become former smokers reverted to being current smokers (figure 2, pink dashed lines). We then aimed to reflect all quit attempts rather than only transitions to sustained abstinence. In rough calibrations, we found that the optimal multiplier would be between 5 and 10 when applied to cessation rates from the previous step. In finer calibrations, we varied the multiplier across the range of 5 to 10 in increments of 0.25. We found that multiplying the CISNET-reported cessation rates by 7.75 for women and by 7.25 for men best approximated the CISNET-projected prevalence of current smokers, with RMSE 0.004/0.008 and CV-RMSE 2%/3% for women/men (figure 2, black lines).

### External validation

#### *Mortality*

In simulating the 1997-2009 NHIS population along with smoking relapse, we found that the age-, sex-, and smoking-stratified mortality rates generated by the STOP model were a good fit to those derived

1  
2  
3 from NHIS (MAPE 7%, examples in supplementary table 2). Cumulative mortality curves for 20 year-old  
4  
5 female and male current smokers and never smokers were similar between STOP projections and NHIS-  
6  
7 derived data, with RMSE <0.01 and CV-RMSE  $\leq$ 1% (figure 3). For 20-year-olds who continued to smoke  
8  
9 until death, the STOP model predicted median life expectancy (counting years from birth) of 77.5 years  
10  
11 for women and 72.5 years for men.  
12  
13

### 14 15 16 *Smoking prevalence*

17  
18 Using those surveyed by NHIS in 1997 as the input cohort, the STOP-projected prevalence of current,  
19  
20 former, and never smokers each year from 1998 to 2009 was similar to that reported by NHIS, with  
21  
22 overall RMSE 0.04 and CV-RMSE 12% for both women and men (ages 30-84 years combined;  
23  
24 supplementary figure 2 shows results specifically for ages 40-44 years). Compared to NHIS, the STOP  
25  
26 model slightly underpredicted never smoker prevalence and slightly overpredicted former smoker  
27  
28 prevalence in later years. In the two-way sensitivity analysis, we found that cessation multipliers of  
29  
30 7.5/7.0 for women/men and initiation multipliers of 0.9/1.0 provided the best overall fit (lowest RMSE)  
31  
32 of STOP-projected current smoker prevalence compared to that reported by NHIS (supplementary figure  
33  
34  
35  
36  
37  
38  
39  
40  
41  
42  
43  
44  
45  
46  
47  
48  
49  
50  
51  
52  
53  
54  
55  
56  
57  
58  
59  
60 3).

## DISCUSSION

We developed, calibrated, and validated STOP, a novel microsimulation model of individual-level tobacco use behaviors and outcomes. Our initial model input parameters included smoking initiation and cessation and smoking-stratified mortality, and we demonstrated cross-validity compared to the CISNET model. After incorporating relapse, we calibrated smoking cessation probabilities to reflect quit attempts rather than sustained abstinence. We then validated STOP model output with: 1) smoking prevalence over time reported by the CISNET model for US women and men born in 1950; 2) age-, sex-, and smoking-stratified mortality rates and cumulative mortality reported by the NHIS-NDI linked database for the years 1997-2009; and 3) prevalence of current, former, and never smokers by sex from 1998 to 2009 reported by NHIS, using 1997 NHIS-reported population characteristics as inputs.

Most existing tobacco models simulate at the population level or lack the capacity to consider smoking initiation and (non-sustained) quit attempts throughout a lifetime.[18,23–25,37,46,47] The individual-level details of STOP can be employed to simulate and compare behaviors and interventions. While this calibration and validation analysis focused on cigarette smoking because of the availability of historical data for comparisons, we intend to broaden the use of STOP to include electronic cigarettes (e-cigs). Longitudinal cohort studies and clinical trials are examining the effects of e-cig use on tobacco smoking behaviors and clinical outcomes over long time horizons, but data are needed now to inform guidelines and policy around these novel products.[15,44,48,49] Results from multiple distinct, validated models can help motivate policy decisions, and consistency of policy recommendations across unique, independent models reinforces confidence in their recommendations.[50–54]

A novel aspect of the STOP model is the incorporation of smoking relapse on a monthly basis, reflecting the understanding of nicotine addiction as a chronic relapsing condition with rapid cycles between use

1  
2  
3 and cessation.[26,45,55–58] This key feature enables an important distinction between a quit attempt  
4 and sustained abstinence. This distinction is missing from most tobacco models and indeed from many  
5 epidemiologic studies of smoking and smoking cessation, which consider the transition from “current”  
6 to “former” smoker to be an abrupt one that results in sustained abstinence. Incorporating relapse  
7 required calibrating cessation rates by applying multipliers. The cessation multipliers that provided the  
8 best fits to empirical data are in line with published data regarding the number of quit attempts  
9 required before sustained abstinence is achieved.[27,55,59] The slightly higher multiplier needed for  
10 women compared to men is consistent with NHIS data showing that among ever smokers (current  
11 smokers plus former smokers) aged 60 years and above, a greater proportion of women compared to  
12 men are former smokers.[35] Calibration of cessation rates may compensate for other inaccuracies in  
13 model inputs or structure, though the pre-calibration (without relapse) STOP-generated results fit well  
14 with those of CISNET.  
15  
16  
17  
18  
19  
20  
21  
22  
23  
24  
25  
26  
27  
28  
29  
30  
31

32 Many trials of smoking cessation interventions follow patients for a few months or up to one year, but  
33 they do not report subsequent relapse. By including relapse, the STOP model can combine data from  
34 short-term trials of smoking cessation interventions with data from natural history studies of smoking  
35 and smoking cessation to project longer-term outcomes including sustained abstinence. The flexibility to  
36 integrate data from a variety of sources is a strength of modeling analyses.  
37  
38  
39  
40  
41  
42  
43  
44  
45

46 Going forward, we plan to use the STOP model to study contemporary rather than historical populations  
47 and to predict future tobacco use, while utilizing deterministic and probabilistic sensitivity analyses to  
48 account for uncertainty in future behavioral transition probabilities and mortality probabilities.[60] As  
49 no empirical data exist with which to validate model output of future tobacco use, we validated STOP  
50 model output against historical populations. Most US historical data on smoking prevalence and  
51  
52  
53  
54  
55  
56  
57  
58  
59  
60

1  
2  
3 smoking-associated mortality are based at least in part on NHIS, the oldest ongoing survey of smoking  
4 prevalence in the US.[1,61–63] We compared STOP model output to CISNET model output, to NHIS  
5 itself, and to results from a study by Jha et al.,[1] all of which used NHIS data. We demonstrated cross-  
6 validity of STOP compared to CISNET model results when using CISNET input parameters and then added  
7 relapse probabilities and cessation multipliers. We demonstrated external validity, in a partially  
8 dependent manner, of STOP compared to NHIS data when using some NHIS-derived input parameters  
9 plus the external relapse probabilities and cessation multipliers from our cross-validation. Though  
10 independent external validation sources are ideal, dependent sources can still be useful, especially in  
11 this scenario where most of the available US historical smoking prevalence, behavior, and mortality data  
12 are derived from NHIS.[28] Of note, in a two-way sensitivity analysis in which we simultaneously varied  
13 the smoking initiation and cessation multipliers to achieve a close fit to NHIS smoking prevalence data,  
14 the optimal cessation multipliers were very similar to those we found in our cross-validation calibration  
15 step, demonstrating the robustness of these multipliers across different sets of assumptions.  
16  
17  
18  
19  
20  
21  
22  
23  
24  
25  
26  
27  
28  
29  
30  
31  
32  
33  
34

35 In an external validation exercise, the STOP model projection for never smoker prevalence from 1998 to  
36 2009 was slightly lower than that reported by NHIS, and the STOP model projection for former smoker  
37 prevalence was slightly higher than NHIS data. In NHIS, former smokers were self-defined but on  
38 average had been abstinent for over a decade. NHIS considered those who smoked “some days” to be  
39 current smokers, though some of them may have been in the midst of a short-duration quit attempt.  
40 STOP model output formally labels these people, who may be in the Recent Quitter state, former  
41 smokers but assigns them the mortality risks of current smokers (until a defined period of abstinence).  
42 STOP reflects monthly quitting and relapsing behaviors whereas NHIS is an annual cross-sectional  
43 survey. Thus, one would expect the STOP model to report a higher prevalence of former smokers than  
44 NHIS, as seen in our results. Immigration could also account for some of the difference between NHIS  
45  
46  
47  
48  
49  
50  
51  
52  
53  
54  
55  
56  
57  
58  
59  
60

1  
2  
3 data and STOP model-generated results: immigrants were surveyed in NHIS but our model analysis does  
4 not account for them. Smoking prevalence differs between the immigrant and non-immigrant  
5 populations.[64,65] On the other hand, STOP model-generated life expectancies were similar to the  
6 median life expectancies for 30-year-old smokers reported by Jha et al. (also derived from NHIS data): 77  
7 years for women and 72 years for men.[1]  
8  
9  
10  
11  
12  
13  
14  
15

16 The STOP model has features, and will have applications, not described in this analysis. We developed  
17 the model to incorporate resource utilization. The STOP model can capture the healthcare costs  
18 associated with being a current, former, or never smoker, as well as the costs of tobacco cessation  
19 interventions. By incorporating the chronic relapsing nature of nicotine addiction, the STOP model can  
20 account for the resources required for recurrent cessation interventions (e.g., restarting the same or a  
21 different intervention after smoking relapse), an important consideration in cost-effectiveness and  
22 policy analyses. Ultimately, we will use the STOP model to evaluate behavioral and clinical outcomes,  
23 costs of care, and cost-effectiveness of tobacco cessation interventions, programs, and policies. An  
24 overarching goal is to provide information that can inform decision makers – including clinicians, public  
25 health officials, and policymakers – on cost-effective interventions that reduce the clinical and economic  
26 burden of tobacco use. The model can eventually assess the impact of different financing options for  
27 tobacco cessation interventions – for example, annual versus lifetime insurance coverage limits. The  
28 STOP model’s flexibility will allow for analyses beyond US populations, including settings where  
29 smoking-related behaviors and clinical outcomes may be different from those in the US.[66]  
30  
31  
32  
33  
34  
35  
36  
37  
38  
39  
40  
41  
42  
43  
44  
45  
46  
47  
48  
49

50 The STOP model has limitations. Its projections are limited by assumptions and the specificity of  
51 available data – for example, age, sex, and birth year stratifications of smoking behavioral transitions.  
52 While we have aimed to calibrate and validate the model with the best available historical data, any use  
53  
54  
55  
56  
57  
58  
59  
60



1  
2  
3 of the model to project future outcomes should be approached with prudence. Calibration on historical  
4 data is no panacea because of concerns of calibration drift, and relapse rates could change over time  
5 due to changes in population-level nicotine dependence.[67] Nonetheless, input parameter values can  
6 be varied in sensitivity analysis. STOP does not include dynamics such as the effects of one person's  
7 smoking on another person's smoking behaviors. Smoking is associated with other factors not directly  
8 captured by STOP, including race, socioeconomic status, mental illness, and other substance use, but  
9 different populations can be separately simulated in the model with input parameters specific to that  
10 population. There is heterogeneity in smoking behaviors, including cigarettes consumed per day and  
11 daily versus nondaily smoking. STOP enables stratification by intensity of smoking, which can be used to  
12 represent amount or frequency of smoking.  
13  
14  
15  
16  
17  
18  
19  
20  
21  
22  
23  
24  
25  
26  
27

28 In conclusion, STOP is a novel, individual-level microsimulation model that captures tobacco-related  
29 behaviors – importantly including relapse – and outcomes with a goal of informing decision making  
30 around tobacco cessation interventions and tobacco policy. We have demonstrated that the model is  
31 well-calibrated and validated to another model and to historical cohorts. We plan to use the model for  
32 policy-relevant analysis of contemporary patient-level and population-level care while reflecting real-life  
33 tobacco use and cessation behaviors.  
34  
35  
36  
37  
38  
39  
40  
41  
42  
43  
44  
45  
46  
47  
48  
49  
50  
51  
52  
53  
54  
55  
56  
57  
58  
59  
60

## **AUTHOR CONTRIBUTIONS**

Specific contributions are as follows:

KPR – study conception, study design, data analysis, data interpretation

AJB – study design, data analysis, data interpretation

DEL – study design, data interpretation

PT – data analysis, data interpretation

EPH – study design, data interpretation

TH – study conception, study design, data analysis

BO – study design

LY – data analysis, data interpretation

FMS – study design, data analysis, data interpretation

ADP – study design, data interpretation

KAF – study design, data interpretation

MCW – study design, data interpretation

NAR – study conception, study design, data interpretation

RPW – study conception, study design, data interpretation

KPR drafted the first version of the manuscript. All authors critically reviewed the manuscript for important intellectual content and approved the final submitted version.

**COMPETING INTERESTS**

NAR receives royalties from UpToDate, Inc., is a consultant for Achieve Life Sciences, and has been an unpaid consultant for Pfizer. All other authors report no competing interests.

**SOURCES OF FUNDING**

This work was supported by awards from the National Institute on Drug Abuse (K01 DA042687) and the National Heart, Lung, and Blood Institute (K01 HL123349) of the National Institutes of Health, and the Steve and Deborah Gorlin MGH Research Scholars Award. The funding sources had no role in the design, analysis, or interpretation of the study, the writing of the manuscript, or in the decision to submit the manuscript for publication. The content is solely the responsibility of the authors and does not necessarily represent the official views of the National Institutes of Health or Massachusetts General Hospital.

**DATA STATEMENT**

Data used to parameterize the model are publicly available at <https://resources.cisnet.cancer.gov/projects> and at <https://nhis.ipums.org/nhis>.

## REFERENCES

- 1 Jha P, Ramasundarahettige C, Landsman V, *et al*. 21st-century hazards of smoking and benefits of cessation in the United States. *N Engl J Med* 2013;**368**:341–50. doi:10.1056/NEJMsa1211128
- 2 Xu X, Bishop EE, Kennedy SM, *et al*. Annual healthcare spending attributable to cigarette smoking: an update. *Am J Prev Med* 2015;**48**:326–33. doi:10.1016/j.amepre.2014.10.012
- 3 US Department of Health and Human Services. *The health consequences of smoking-50 years of progress: a report of the Surgeon General*. Atlanta, GA: US Department of Health and Human Services, Centers for Disease Control and Prevention, National Center for Chronic Disease Prevention and Health Promotion, Office on Smoking and Health 2014. <https://www.hhs.gov/surgeongeneral/reports-and-publications/tobacco/index.html>
- 4 Creamer MR, Wang TW, Babb S, *et al*. Tobacco product use and cessation indicators among adults - United States, 2018. *MMWR Morb Mortal Wkly Rep* 2019;**68**:1013–9. doi:10.15585/mmwr.mm6845a2
- 5 Patel KK, Jones PG, Ellerbeck EF, *et al*. Underutilization of evidence-based smoking cessation support strategies despite high smoking addiction burden in peripheral artery disease specialty care: insights from the international PORTRAIT registry. *J Am Heart Assoc* 2018;**7**:e010076. doi:10.1161/JAHA.118.010076
- 6 Office of the Commissioner, US Food and Drug Administration. FDA finalizes guidance for premarket tobacco product applications for electronic nicotine delivery systems as part of commitment to continuing a strong oversight of e-cigarettes. 11 Jun 2019. <http://www.fda.gov/news-events/press-announcements/fda-finalizes-guidance-premarket-tobacco-product-applications-electronic-nicotine-delivery-systems> (accessed 9 Jan 2020).
- 7 Office of the Commissioner, US Food and Drug Administration. FDA permits sale of IQOS Tobacco Heating System through premarket tobacco product application pathway. 30 Apr 2019. <http://www.fda.gov/news-events/press-announcements/fda-permits-sale-iqos-tobacco-heating-system-through-premarket-tobacco-product-application-pathway> (accessed 9 Jan 2020).
- 8 Reddy KP, Parker RA, Losina E, *et al*. Impact of cigarette smoking and smoking cessation on life expectancy among people with HIV: a US-based modeling study. *J Infect Dis* 2016;**214**:1672–81. doi:10.1093/infdis/jiw430
- 9 Reddy KP, Kong CY, Hyle EP, *et al*. Lung cancer mortality associated with smoking and smoking cessation among people living with HIV in the United States. *JAMA Intern Med* 2017;**177**:1613–21. doi:10.1001/jamainternmed.2017.4349
- 10 Apelberg BJ, Feirman SP, Salazar E, *et al*. Potential public health effects of reducing nicotine levels in cigarettes in the United States. *N Engl J Med* 2018;**378**:1725–33. doi:10.1056/NEJMsr1714617
- 11 Walensky RP, Ross EL, Kumarasamy N, *et al*. Cost-effectiveness of HIV treatment as prevention in serodiscordant couples. *N Engl J Med* 2013;**369**:1715–25. doi:10.1056/NEJMsa1214720

- 1  
2  
3 12 Reddy KP, Gupta-Wright A, Fielding KL, *et al.* Cost-effectiveness of urine-based tuberculosis  
4 screening in hospitalised patients with HIV in Africa: a microsimulation modelling study. *Lancet Glob*  
5 *Health* 2019;**7**:e200–8. doi:10.1016/S2214-109X(18)30436-4  
6  
7 13 Weinstein MC, O'Brien B, Hornberger J, *et al.* Principles of good practice for decision analytic  
8 modeling in health-care evaluation: report of the ISPOR Task Force on Good Research Practices--  
9 Modeling Studies. *Value Health* 2003;**6**:9–17. doi:10.1046/j.1524-4733.2003.00234.x  
10  
11 14 Sanders GD, Neumann PJ, Basu A, *et al.* Recommendations for conduct, methodological practices,  
12 and reporting of cost-effectiveness analyses: Second Panel on Cost-Effectiveness in Health and  
13 Medicine. *JAMA* 2016;**316**:1093–103. doi:10.1001/jama.2016.12195  
14  
15 15 National Academies of Sciences, Engineering, and Medicine. *Public Health Consequences of E-*  
16 *Cigarettes*. Washington, DC: : The National Academies Press 2018. doi:10.17226/24952  
17  
18 16 Office of Disease Prevention, National Institutes of Health. Tobacco regulatory research priorities.  
19 <https://prevention.nih.gov/tobacco-regulatory-research/tobacco-regulatory-research-priorities>  
20 (accessed 9 Jan 2020).  
21  
22 17 Levy DT, Cummings KM, Villanti AC, *et al.* A framework for evaluating the public health impact of e-  
23 cigarettes and other vaporized nicotine products. *Addiction* 2017;**112**:8–17. doi:10.1111/add.13394  
24  
25 18 Levy DT, Yuan Z, Li Y, *et al.* A modeling approach to gauging the effects of nicotine vaping product  
26 use on cessation from cigarettes: what do we know, what do we need to know? *Addiction* 2019;**114**  
27 **Suppl 1**:86–96. doi:10.1111/add.14530  
28  
29 19 Warner KE, Mendez D. E-cigarettes: comparing the possible risks of increasing smoking initiation  
30 with the potential benefits of increasing smoking cessation. *Nicotine Tob Res* 2019;**21**:41–7.  
31 doi:10.1093/ntr/nty062  
32  
33 20 Cherng ST, Tam J, Christine P, *et al.* Modeling the effects of e-cigarettes on smoking behavior:  
34 implications for future adult smoking prevalence. *Epidemiology* 2016;**27**:819–26.  
35 doi:10.1097/EDE.0000000000000497  
36  
37 21 Kalkhoran S, Glantz SA. Modeling the health effects of expanding e-cigarette sales in the United  
38 States and United Kingdom: a Monte Carlo analysis. *JAMA Intern Med* 2015;**175**:1671–80.  
39 doi:10.1001/jamainternmed.2015.4209  
40  
41 22 Vugrin ED, Rostron BL, Verzi SJ, *et al.* Modeling the potential effects of new tobacco products and  
42 policies: a dynamic population model for multiple product use and harm. *PLoS One*  
43 2015;**10**:e0121008. doi:10.1371/journal.pone.0121008  
44  
45 23 Levy DT, Borland R, Lindblom EN, *et al.* Potential deaths averted in USA by replacing cigarettes with  
46 e-cigarettes. *Tob Control* 2018;**27**:18–25. doi:10.1136/tobaccocontrol-2017-053759  
47  
48 24 Soneji SS, Sung H-Y, Primack BA, *et al.* Quantifying population-level health benefits and harms of e-  
49 cigarette use in the United States. *PLoS One* 2018;**13**:e0193328. doi:10.1371/journal.pone.0193328  
50  
51  
52  
53  
54  
55  
56  
57  
58  
59  
60

- 1  
2  
3 25 Levy DT, Borland R, Villanti AC, *et al.* The application of a decision-theoretic model to estimate the  
4 public health impact of vaporized nicotine product initiation in the United States. *Nicotine Tob Res*  
5 2017;**19**:149–59. doi:10.1093/ntr/ntw158  
6  
7 26 Hughes JR, Solomon LJ, Naud S, *et al.* Natural history of attempts to stop smoking. *Nicotine Tob Res*  
8 2014;**16**:1190–8. doi:10.1093/ntr/ntu052  
9  
10 27 Chaiton M, Diemert L, Cohen JE, *et al.* Estimating the number of quit attempts it takes to quit  
11 smoking successfully in a longitudinal cohort of smokers. *BMJ Open* 2016;**6**:e011045.  
12 doi:10.1136/bmjopen-2016-011045  
13  
14 28 Eddy DM, Hollingworth W, Caro JJ, *et al.* Model transparency and validation: a report of the ISPOR-  
15 SMDM Modeling Good Research Practices Task Force-7. *Med Decis Making* 2012;**32**:733–43.  
16 doi:10.1177/0272989X12454579  
17  
18 29 Vanni T, Karnon J, Madan J, *et al.* Calibrating models in economic evaluation: a seven-step approach.  
19 *Pharmacoeconomics* 2011;**29**:35–49. doi:10.2165/11584600-000000000-00000  
20  
21 30 Karnon J, Vanni T. Calibrating models in economic evaluation: a comparison of alternative measures  
22 of goodness of fit, parameter search strategies and convergence criteria. *Pharmacoeconomics*  
23 2011;**29**:51–62. doi:10.2165/11584610-000000000-00000  
24  
25 31 Cevik M, Ergun MA, Stout NK, *et al.* Using active learning for speeding up calibration in simulation  
26 models. *Med Decis Making* 2016;**36**:581–93. doi:10.1177/0272989X15611359  
27  
28 32 Ciaranello AL, Morris BL, Walensky RP, *et al.* Validation and calibration of a computer simulation  
29 model of pediatric HIV infection. *PLoS One* 2013;**8**:e83389. doi:10.1371/journal.pone.0083389  
30  
31 33 Rydzak CE, Cotich KL, Sax PE, *et al.* Assessing the performance of a computer-based policy model of  
32 HIV and AIDS. *PLoS One* 2010;**5**. doi:10.1371/journal.pone.0012647  
33  
34 34 Kazemian P, Wexler DJ, Fields NF, *et al.* Development and validation of PREDICT-DM: a new  
35 microsimulation model to project and evaluate complications and treatments of type 2 diabetes  
36 mellitus. *Diabetes Technol Ther* 2019;**21**:344–55. doi:10.1089/dia.2018.0393  
37  
38 35 Blewett LA, Rivera Drew JA, Griffin R, *et al.* *IPUMS Health Surveys: National Health Interview Survey,*  
39 *Version 6.3 [dataset]*. Minneapolis, MN: IPUMS. <https://nhis.ipums.org> (accessed 9 Jan 2020).  
40  
41 36 Centers for Disease Control and Prevention. National Health Interview Survey. Adult tobacco use -  
42 major changes. [https://www.cdc.gov/nchs/nhis/tobacco/tobacco\\_changes.htm](https://www.cdc.gov/nchs/nhis/tobacco/tobacco_changes.htm) (accessed 9 Jan  
43 2020).  
44  
45 37 Holford TR, Meza R, Warner KE, *et al.* Tobacco control and the reduction in smoking-related  
46 premature deaths in the United States, 1964-2012. *JAMA* 2014;**311**:164–71.  
47 doi:10.1001/jama.2013.285112  
48  
49 38 Weinstein MC. Recent developments in decision-analytic modelling for economic evaluation.  
50 *Pharmacoeconomics* 2006;**24**:1043–53. doi:10.2165/00019053-200624110-00002  
51  
52  
53  
54  
55  
56  
57  
58  
59  
60

- 1  
2  
3 39 Rutter CM, Zaslavsky A, Feuer E. Dynamic microsimulation models for health outcomes: a review.  
4 *Med Decis Making* 2011;**31**:10–8. doi:10.1177/0272989X10369005  
5  
6 40 Thun MJ, Carter BD, Feskanich D, *et al.* 50-year trends in smoking-related mortality in the United  
7 States. *N Engl J Med* 2013;**368**:351–64. doi:10.1056/NEJMsa1211127  
8  
9 41 Holford TR, Levy DT, McKay LA, *et al.* Patterns of birth cohort-specific smoking histories, 1965-2009.  
10 *Am J Prev Med* 2014;**46**:e31-37. doi:10.1016/j.amepre.2013.10.022  
11  
12 42 Tonstad S, Tønnesen P, Hajek P, *et al.* Effect of maintenance therapy with varenicline on smoking  
13 cessation: a randomized controlled trial. *JAMA* 2006;**296**:64–71. doi:10.1001/jama.296.1.64  
14  
15 43 Brendryen H, Kraft P. Happy Ending: a randomized controlled trial of a digital multi-media smoking  
16 cessation intervention. *Addiction* 2008;**103**:478–84. doi:10.1111/j.1360-0443.2007.02119.x  
17  
18 44 Bullen C, Howe C, Laugesen M, *et al.* Electronic cigarettes for smoking cessation: a randomised  
19 controlled trial. *Lancet* 2013;**382**:1629–37. doi:10.1016/S0140-6736(13)61842-5  
20  
21 45 Hughes JR, Keely J, Naud S. Shape of the relapse curve and long-term abstinence among untreated  
22 smokers. *Addiction* 2004;**99**:29–38. doi:10.1111/j.1360-0443.2004.00540.x  
23  
24 46 Warner KE, Mendez D. E-cigarettes: comparing the possible risks of increasing smoking initiation  
25 with the potential benefits of increasing smoking cessation. *Nicotine Tob Res* 2019;**21**:41–7.  
26 doi:10.1093/ntr/nty062  
27  
28 47 Feuer EJ, Levy DT, McCarthy WJ. Chapter 1: The impact of the reduction in tobacco smoking on U.S.  
29 lung cancer mortality, 1975–2000: an introduction to the problem. *Risk Analysis* 2012;**32**:S6–13.  
30 doi:10.1111/j.1539-6924.2011.01745.x  
31  
32 48 Hajek P, Phillips-Waller A, Przulj D, *et al.* A randomized trial of e-cigarettes versus nicotine-  
33 replacement therapy. *N Engl J Med* 2019;**380**:629–37. doi:10.1056/NEJMoa1808779  
34  
35 49 Population Assessment of Tobacco and Health (PATH).  
36 <https://pathstudyinfo.nih.gov/UI/HomeMobile.aspx> (accessed 9 Jan 2020).  
37  
38 50 Paltiel AD, Weinstein MC, Kimmel AD, *et al.* Expanded screening for HIV in the United States--an  
39 analysis of cost-effectiveness. *N Engl J Med* 2005;**352**:586–95. doi:10.1056/NEJMsa042088  
40  
41 51 Sanders GD, Bayoumi AM, Sundaram V, *et al.* Cost-effectiveness of screening for HIV in the era of  
42 highly active antiretroviral therapy. *N Engl J Med* 2005;**352**:570–85. doi:10.1056/NEJMsa042657  
43  
44 52 Dugdale CM, Ciaranello AL, Bekker L-G, *et al.* Risks and benefits of dolutegravir- and efavirenz-based  
45 strategies for South African women with HIV of child-bearing potential: a modeling study. *Ann*  
46 *Intern Med* 2019;**170**:614–25. doi:10.7326/M18-3358  
47  
48 53 Phillips AN, Venter F, Havlir D, *et al.* Risks and benefits of dolutegravir-based antiretroviral drug  
49 regimens in sub-Saharan Africa: a modelling study. *Lancet HIV* 2019;**6**:e116–27. doi:10.1016/S2352-  
50 3018(18)30317-5  
51  
52  
53  
54  
55  
56  
57  
58  
59  
60

- 1  
2  
3 54 Berry DA, Cronin KA, Plevritis SK, *et al.* Effect of screening and adjuvant therapy on mortality from  
4 breast cancer. *N Engl J Med* 2005;**353**:1784–92. doi:10.1056/NEJMoa050518  
5
- 6 55 Borland R, Partos TR, Yong H-H, *et al.* How much unsuccessful quitting activity is going on among  
7 adult smokers? Data from the International Tobacco Control Four Country cohort survey. *Addiction*  
8 2012;**107**:673–82. doi:10.1111/j.1360-0443.2011.03685.x  
9
- 10 56 Herd N, Borland R, Hyland A. Predictors of smoking relapse by duration of abstinence: findings from  
11 the International Tobacco Control (ITC) Four Country Survey. *Addiction* 2009;**104**:2088–99.  
12 doi:10.1111/j.1360-0443.2009.02732.x  
13
- 14 57 Herd N, Borland R. The natural history of quitting smoking: findings from the International Tobacco  
15 Control (ITC) Four Country Survey. *Addiction* 2009;**104**:2075–87. doi:10.1111/j.1360-  
16 0443.2009.02731.x  
17
- 18 58 National Institute on Drug Abuse. The science of drug use and addiction: the basics.  
19 <https://www.drugabuse.gov/publications/media-guide/science-drug-use-addiction-basics> (accessed  
20 9 Jan 2020).  
21
- 22 59 Jones JM. Smoking habits stable; most would like to quit. 18 Jul 2006. Gallup.com.  
23 <https://news.gallup.com/poll/23791/Smoking-Habits-Stable-Most-Would-Like-Quit.aspx> (accessed 9  
24 Jan 2020).  
25
- 26 60 Briggs AH, Weinstein MC, Fenwick EAL, *et al.* Model parameter estimation and uncertainty analysis:  
27 a report of the ISPOR-SMDM Modeling Good Research Practices Task Force Working Group-6. *Med*  
28 *Decis Making* 2012;**32**:722–32. doi:10.1177/0272989X12458348  
29
- 30 61 Wang TW, Asman K, Gentzke AS, *et al.* Tobacco product use among adults - United States, 2017.  
31 *MMWR Morb Mortal Wkly Rep* 2018;**67**:1225–32. doi:10.15585/mmwr.mm6744a2  
32
- 33 62 Babb S, Malarcher A, Schauer G, *et al.* Quitting smoking among adults - United States, 2000-2015.  
34 *MMWR Morb Mortal Wkly Rep* 2017;**65**:1457–64. doi:10.15585/mmwr.mm6552a1  
35
- 36 63 Garrett BE, Dube SR, Trosclair A, *et al.* Cigarette smoking - United States, 1965-2008. *MMWR Suppl*  
37 2011;**60**:109–13.  
38
- 39 64 Bosdriesz JR, Lichthart N, Witvliet MI, *et al.* Smoking prevalence among migrants in the US  
40 compared to the US-born and the population in countries of origin. *PLoS One* 2013;**8**:e58654.  
41 doi:10.1371/journal.pone.0058654  
42
- 43 65 Pampel F, Khat M, Bricard D, *et al.* Smoking among immigrant groups in the United States:  
44 prevalence, education gradients, and male-to-female ratios. *Nicotine Tob Res* Published Online First:  
45 13 February 2019. doi:10.1093/ntr/ntz022  
46
- 47 66 GBD 2015 Tobacco Collaborators. Smoking prevalence and attributable disease burden in 195  
48 countries and territories, 1990-2015: a systematic analysis from the Global Burden of Disease Study  
49 2015. *Lancet* 2017;**389**:1885–906. doi:10.1016/S0140-6736(17)30819-X  
50  
51  
52  
53  
54  
55  
56  
57  
58  
59  
60



1  
2  
3  
4  
5  
6  
7  
8  
9  
10  
11  
12  
13  
14  
15  
16  
17  
18  
19  
20  
21  
22  
23  
24  
25  
26  
27  
28  
29  
30  
31  
32  
33  
34  
35  
36  
37  
38  
39  
40  
41  
42  
43  
44  
45  
46  
47  
48  
49  
50  
51  
52  
53  
54  
55  
56  
57  
58  
59  
60

67 Yi Z, Mayorga ME, Hassmiller Lich K, *et al.* Changes in cigarette smoking initiation, cessation, and relapse among U.S. adults: a comparison of two longitudinal samples. *Tob Induc Dis* 2017;**15**:17. doi:10.1186/s12971-017-0121-3

For peer review only

## FIGURE LEGENDS

### Figure 1. Overview of tobacco use states and transitions in Simulation of Tobacco and Nicotine

#### Outcomes and Policy (STOP) microsimulation model.

This is a simplified, stylized depiction of smoking states and transitions – for example, dimensions such as age and sex are not represented in the figure. The ovals represent possible cigarette smoking states or the deceased state. The arrows represent monthly transitions by which an individual can switch to a different state. The “Abstinence, sustained” transition is depicted by a dashed line because there is not a monthly probability of transition – instead, the transition occurs after an individual has spent a user-defined duration (e.g., one year) in the “Recent Quitter” state. Numerical examples of the transition probabilities are in supplementary table 1.

### Figure 2. Cross-validation and calibration exercise: STOP-generated results and CISNET-generated results for current smoking prevalence over time for US people born in 1950.

STOP: Simulation of Tobacco and Nicotine Outcomes and Policy model. CISNET: Cancer Intervention and Surveillance Modeling Network.

Panel A depicts women, Panel B depicts men. The red dotted line shows results from the CISNET model. The other three lines show STOP-generated results after each step of our parameterization and calibration process. The blue line includes parameterization of smoking initiation and cessation, but not relapse. The pink dashed line includes smoking relapse as based on published studies. The black line includes calibration of smoking cessation probabilities to reflect quit attempts and relapse before sustained abstinence.

1  
2  
3 **Figure 3. External validation: STOP model results and NHIS/NDI results for cumulative mortality of**  
4 **current smokers and never smokers from age 20.**  
5

6  
7 STOP: Simulation of Tobacco and Nicotine Outcomes and Policy. NHIS: National Health Interview Survey.

8  
9  
10 NDI: National Death Index. CV-RMSE: coefficient of variation of root-mean-square error.  
11

12  
13  
14 Panel A depicts women, Panel B depicts men. Within each panel, the STOP results and the NHIS data are  
15  
16 not easily distinguishable because they are essentially overlapping. Current smokers are those who  
17  
18 continue to smoke until death. NHIS was linked to NDI for mortality data.  
19  
20  
21  
22  
23  
24  
25  
26  
27  
28  
29  
30  
31  
32  
33  
34  
35  
36  
37  
38  
39  
40  
41  
42  
43  
44  
45  
46  
47  
48  
49  
50  
51  
52  
53  
54  
55  
56  
57  
58  
59  
60

## Figure 1

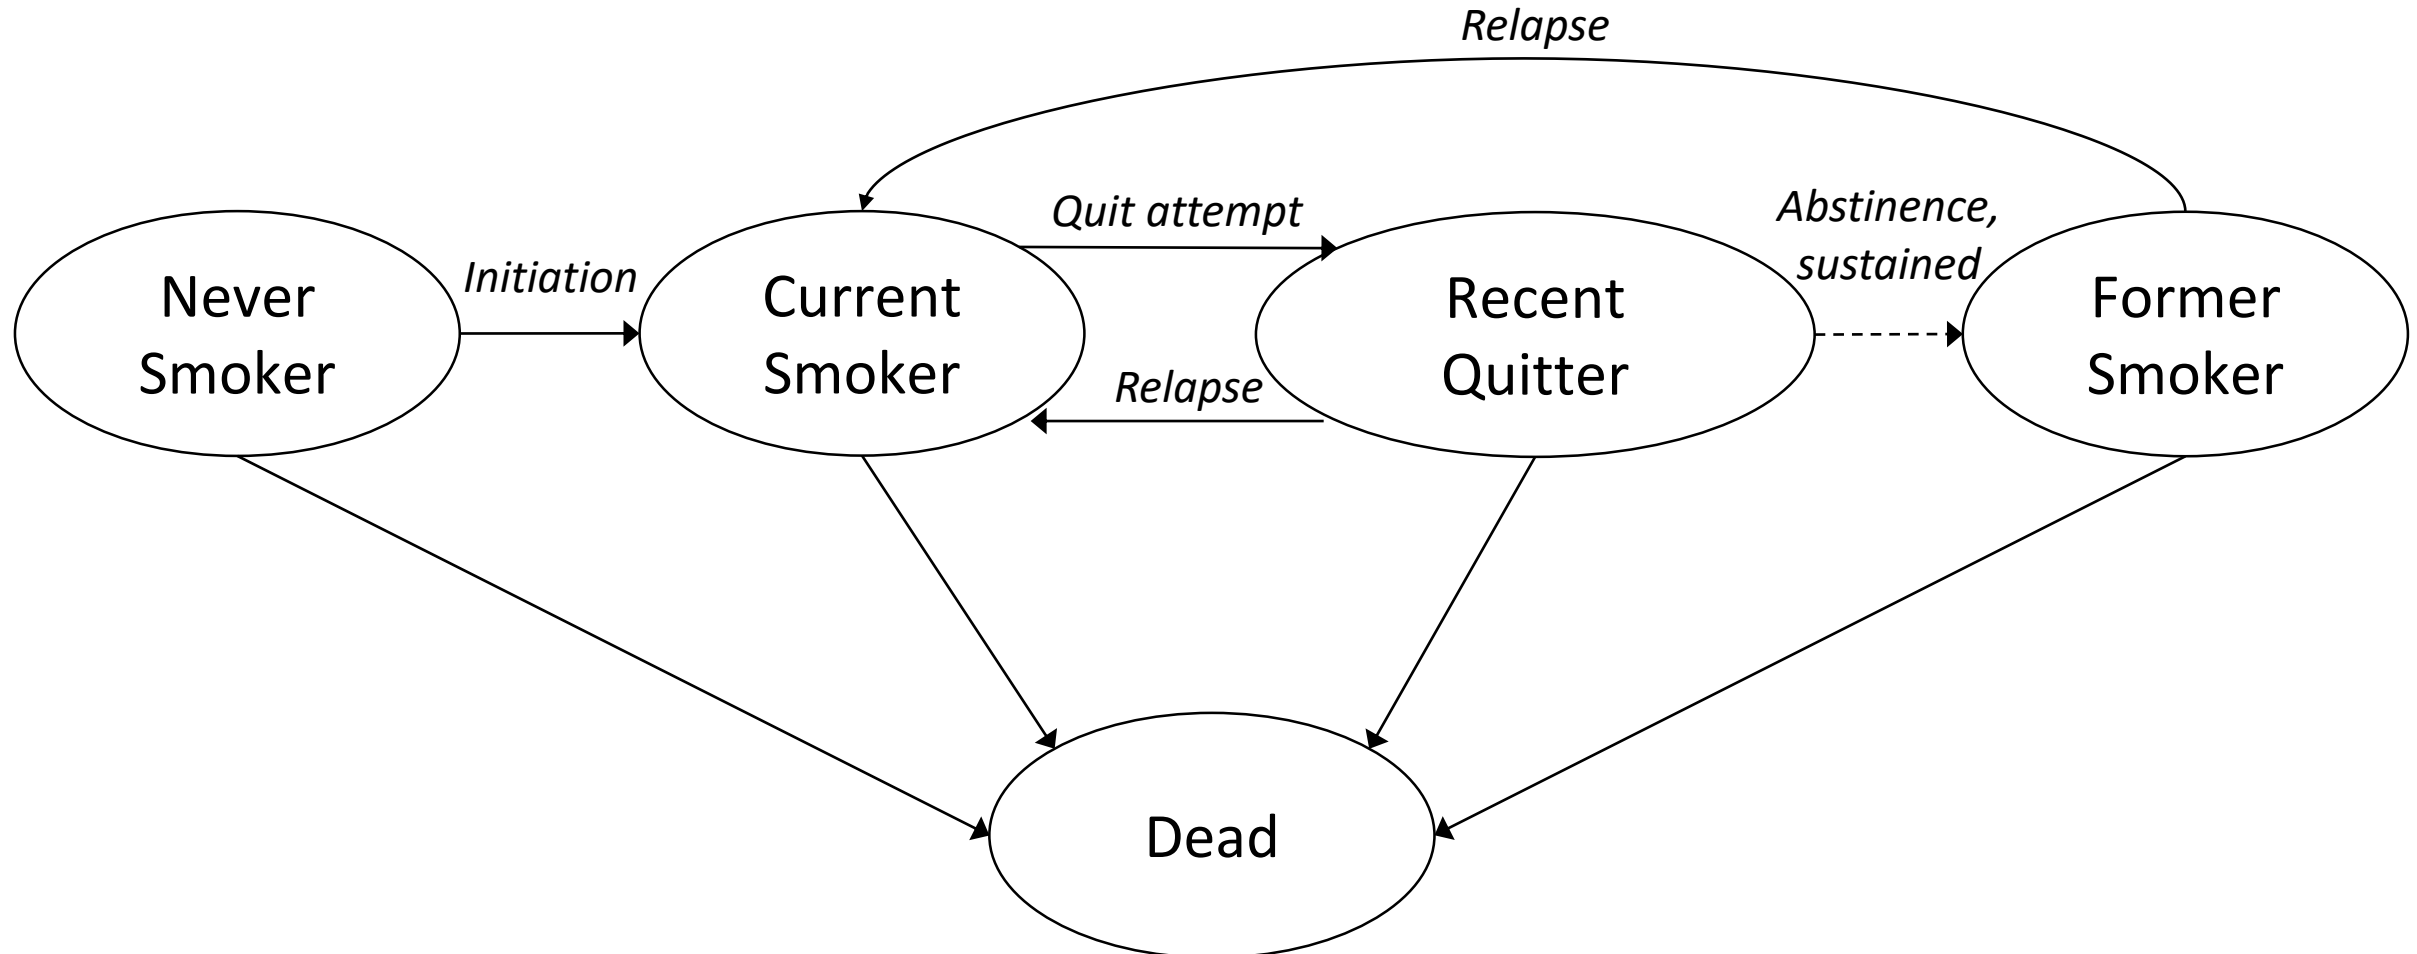

# Figure 2

### A

Current smoker prevalence, women born in 1950

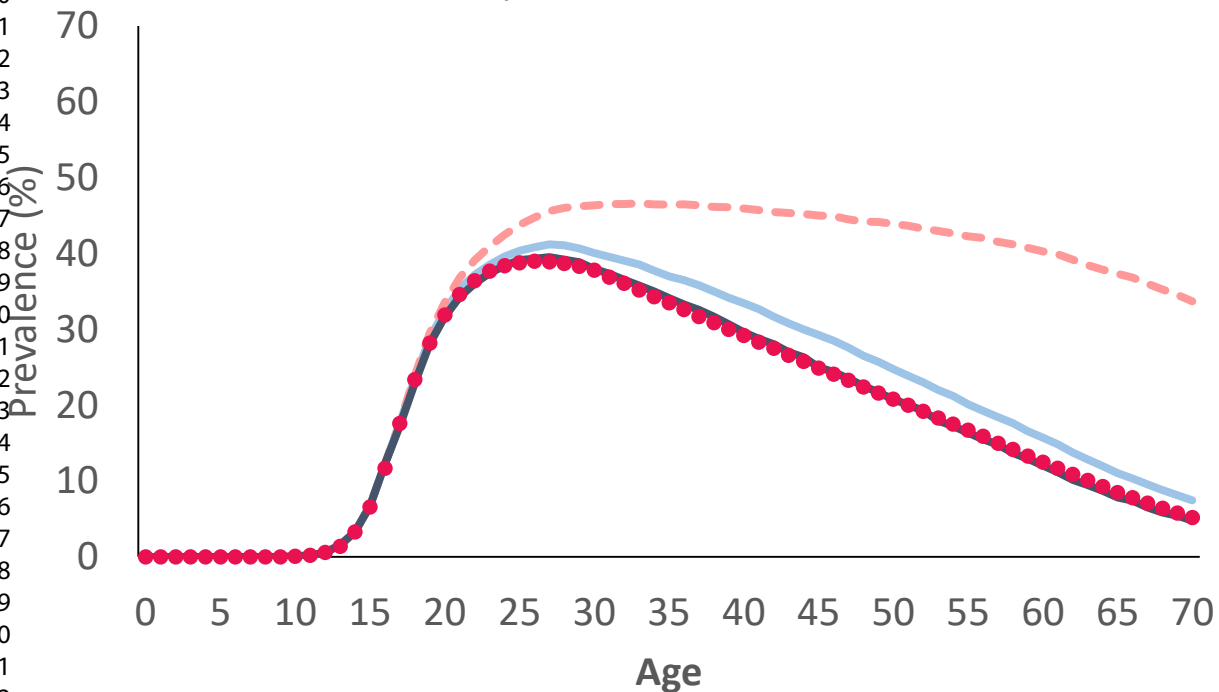

### B

Current smoker prevalence, men born in 1950

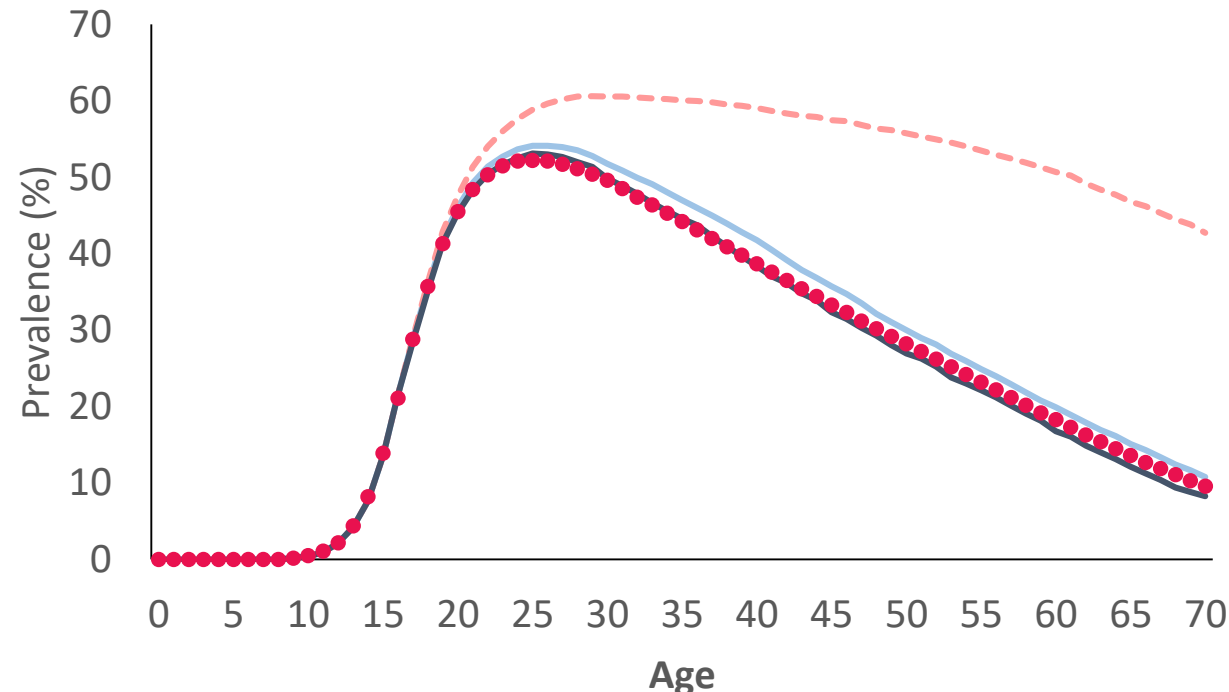

- 1. No relapse
- - - 2. Relapse incorporated, uncalibrated cessation
- 3. Relapse incorporated, calibrated cessation
- CISNET 1950

- 1. No relapse
- - - 2. Relapse incorporated, uncalibrated cessation
- 3. Relapse incorporated, calibrated cessation
- CISNET 1950

# Figure 3

**A** Cumulative mortality by smoking status, women

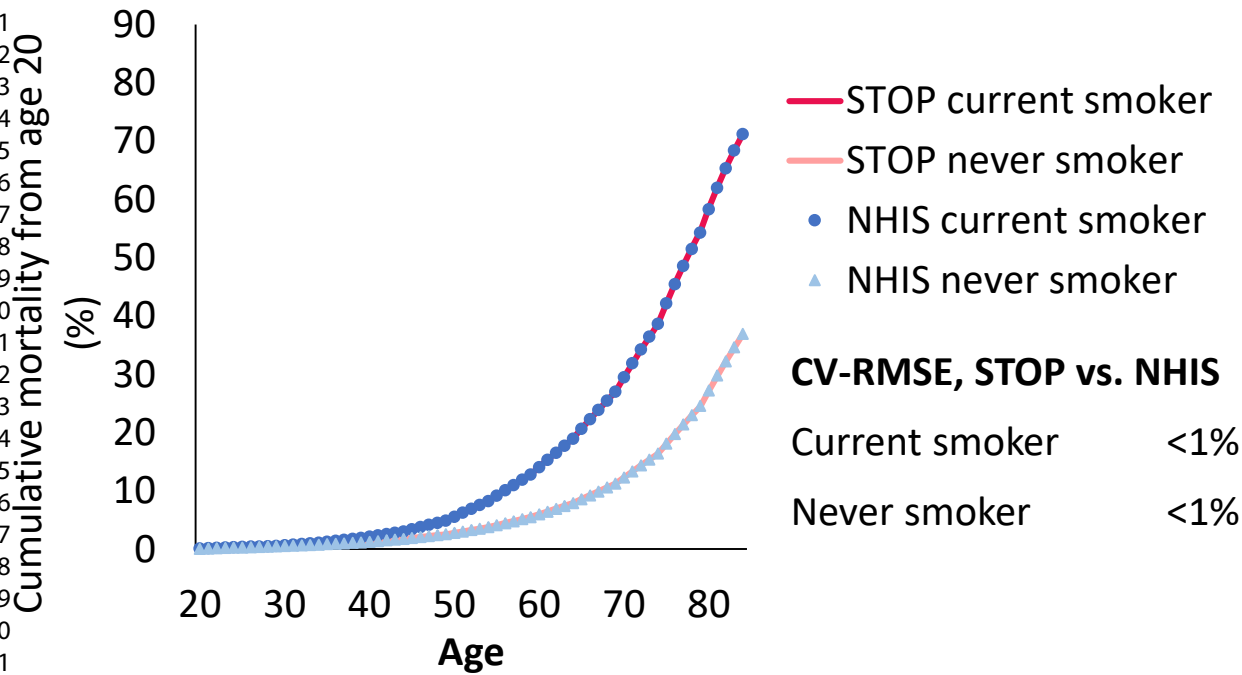

**B** Cumulative mortality by smoking status, men

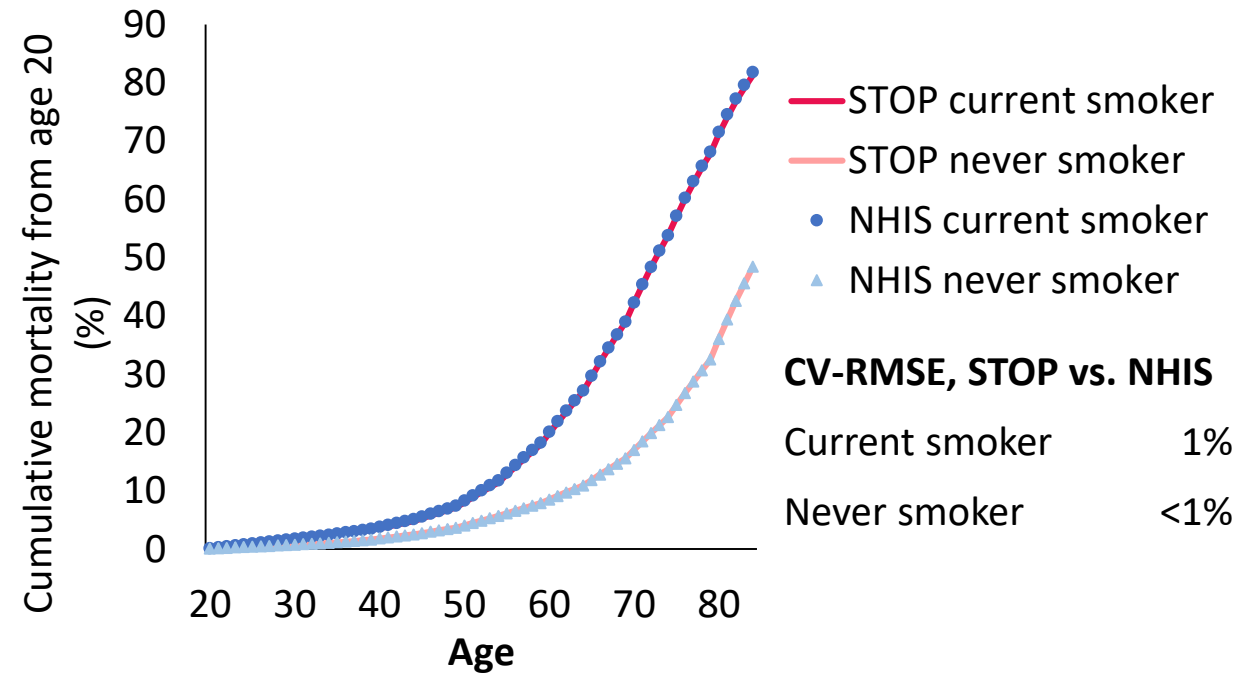

**A novel microsimulation model of tobacco use behaviors and outcomes:  
calibration and validation in a US population**

**Supplement**

Krishna P. Reddy, Alexander J.B. Bulteel, Douglas E. Levy, Pamela Torola, Emily P. Hyle, Taige Hou,  
Benjamin Osher, Liyang Yu, Fatma M. Shebl, A. David Paltiel, Kenneth A. Freedberg, Milton C. Weinstein,  
Nancy A. Rigotti, Rochelle P. Walensky

**Table of Contents**

|                             |       |
|-----------------------------|-------|
| Methods: Supplementary Text | p. 2  |
| References                  | p. 6  |
| Supplementary Table 1       | p. 7  |
| Supplementary Table 2       | p. 9  |
| Supplementary Figure 1      | p. 10 |
| Supplementary Figure 2      | p. 11 |
| Supplementary Figure 3      | p. 12 |

## **METHODS: SUPPLEMENTARY TEXT**

### **National Health Interview Survey (NHIS)**

NHIS is a yearly in-person questionnaire administered to the civilian noninstitutionalized population of the US which, since 1965, has collected information on individual smoking status. Since 1991, the smoking section of the NHIS has first queried “ever smoker” status – defined as having smoked at least 100 cigarettes in one’s lifetime – then asked ever smokers, “Do you NOW smoke cigarettes every day, some days or not at all?” which resulted in the classification of occasional smokers as current smokers, even though they initially may have said they did not smoke now. Regardless of response to the second question, participants were asked about the frequency of their smoking.[1]

### **Use of NHIS data in the Simulation of Tobacco and Nicotine Outcomes and Policy (STOP) model**

We downloaded NHIS and linked National Death Index (NDI) data from the Integrated Public Use Microdata Series (IPUMS) Health Surveys for the years 1997-2009.[2] We obtained basic demographic information, smoking status and behavioral variables, and death status/year of death reported through 2011. For all derivations below, we excluded those with unknown smoking or mortality status. Only people 18 years of age or older were surveyed about tobacco use, and since ages 85+ years are censored, we excluded those as well.

#### *External validation - mortality*

From the pooled 1997-2009 data, we used the IPUMS-recoded and -constructed survey weights adjusting for differential representation in the smoking sub-sample and NDI follow-up. Because of the NHIS sampling design, weights must be used so that the survey respondents can be collectively expanded to represent the civilian noninstitutionalized population of the US. These weights represent a



1  
2  
3 surveyed individual's inverse probability of being included in both the survey supplement, which  
4  
5 contains questions about smoking, and the NHIS-NDI linked mortality files.  
6  
7  
8  
9

10 Smoking cessation inputs: We derived age- and sex-stratified cessation rates using the NHIS  
11 variable that reported years since respondents (former smokers) quit smoking. We excluded  
12 quit ages before age 16 years (due to perceived inconsistency of coding of the "time since quit"  
13 variable – some entries implied negative quit age) and included quit ages through age 85 years.  
14  
15  
16  
17  
18  
19  
20

21 Smoking initiation inputs: Similarly, we derived initiation rates, also age- and sex-stratified, using  
22 the variable that reported years since the respondent (a current or former smoker) started to  
23 smoke regularly. We used initiation rates from ages 6 to 61 years, the last age for which data are  
24 consecutively available for both women and men.  
25  
26  
27  
28  
29  
30  
31

32 Mortality inputs: We calculated mortality rates by age, sex, smoking status, and five-year age  
33 group using the smoking status variable and NDI reporting through 2011. The rates were  
34 calculated from a follow-up period beginning in the respondent's survey year and ending in  
35 2011 or the year of her/his death, whichever came first. Because smoking behavior data were  
36 collected only at baseline in NHIS and not again at the time of death, there may have been some  
37 misclassification of smoking status (e.g., someone who was a current smoker at the time of NHIS  
38 assessment may have subsequently quit and later died but was still considered a current  
39 smoker). However, all-cause mortality rates do not significantly decrease until a few years after  
40 cessation, and we considered those who had quit smoking to have similar mortality risks to  
41 current smokers until five years of abstinence. This reflects contemporary studies in which  
42 former smokers were defined as those who had not smoked in the previous five years and data  
43  
44  
45  
46  
47  
48  
49  
50  
51  
52  
53  
54  
55  
56  
57  
58  
59  
60

1  
2  
3 from large US cohort studies that indicate that the all-cause mortality risk in men who quit  
4  
5 smoking does not fall below that of current smokers until five years of abstinence.[3,4]  
6  
7  
8  
9

10 Input cohort: We derived initial cohort characteristics for this analysis from the NHIS 1997-2009  
11  
12 pooled dataset: current, former and never smoking prevalence by five-year age group from age  
13  
14 <20 to 84 years; mean (standard deviation [SD]) age adjusted for bounding of the distribution;  
15  
16 sex distribution; and mean (SD) time since quit bounded by a minimum quit age of 16 years.  
17  
18  
19  
20

21 Output comparison: We compared STOP model output for mortality to NHIS/NDI-reported  
22  
23 mortality in the form of mortality rates and cumulative mortality from age 20 years.  
24  
25  
26  
27

#### 28 *External validation – smoking prevalence*

29  
30 From the NHIS 1997 data, using the same survey weights as above:  
31  
32  
33

34 Smoking cessation, smoking initiation, and mortality inputs: We used the same cessation,  
35  
36 initiation, and mortality rate inputs as for the mortality validation.  
37  
38  
39  
40

41 Input cohort: We derived input cohort characteristics for this analysis from the 1997 NHIS data:  
42  
43 current, former, and never smoking prevalence by five-year age group from age <20 to 84 years;  
44  
45 mean (SD) age adjusted for bounding of the distribution; sex distribution; and mean (SD) time  
46  
47 since quit bounded by a minimum quit age of 16 years.  
48  
49  
50  
51  
52  
53  
54  
55  
56  
57  
58  
59  
60

1  
2  
3 Output comparison: Starting with the 1997 NHIS respondents and following them each year  
4  
5 from 1998 to 2009, we compared STOP projections to NHIS data regarding prevalence of  
6  
7 current, former, and never smokers by five-year age group from age 30 to 84 years.  
8  
9  
10  
11  
12  
13  
14  
15  
16  
17  
18  
19  
20  
21  
22  
23  
24  
25  
26  
27  
28  
29  
30  
31  
32  
33  
34  
35  
36  
37  
38  
39  
40  
41  
42  
43  
44  
45  
46  
47  
48  
49  
50  
51  
52  
53  
54  
55  
56  
57  
58  
59  
60

For peer review only

## REFERENCES IN SUPPLEMENT

- 1 Centers for Disease Control and Prevention. National Health Interview Survey. Adult tobacco use - major changes. [https://www.cdc.gov/nchs/nhis/tobacco/tobacco\\_changes.htm](https://www.cdc.gov/nchs/nhis/tobacco/tobacco_changes.htm) (accessed 9 Jan 2020).
- 2 Blewett LA, Rivera Drew JA, Griffin R, et al. *IPUMS Health Surveys: National Health Interview Survey, Version 6.3 [dataset]*. Minneapolis, MN: IPUMS. <https://nhis.ipums.org> (accessed 9 Jan 2020).
- 3 Thun MJ, Carter BD, Feskanich D, et al. 50-year trends in smoking-related mortality in the United States. *N Engl J Med* 2013;**368**:351–64. doi:10.1056/NEJMsa1211127
- 4 Jha P, Ramasundarahettige C, Landsman V, et al. 21st-century hazards of smoking and benefits of cessation in the United States. *N Engl J Med* 2013;**368**:341–50. doi:10.1056/NEJMsa1211128
- 5 Tonstad S, Tønnesen P, Hajek P, et al. Effect of maintenance therapy with varenicline on smoking cessation: a randomized controlled trial. *JAMA* 2006;**296**:64–71. doi:10.1001/jama.296.1.64
- 6 Brendryen H, Kraft P. Happy Ending: a randomized controlled trial of a digital multi-media smoking cessation intervention. *Addiction* 2008;**103**:478–84. doi:10.1111/j.1360-0443.2007.02119.x
- 7 Bullen C, Howe C, Laugesen M, et al. Electronic cigarettes for smoking cessation: a randomised controlled trial. *Lancet* 2013;**382**:1629–37. doi:10.1016/S0140-6736(13)61842-5
- 8 Hughes JR, Keely J, Naud S. Shape of the relapse curve and long-term abstinence among untreated smokers. *Addiction* 2004;**99**:29–38. doi:10.1111/j.1360-0443.2004.00540.x

**Supplementary Table 1. Examples of transition probabilities in the simulation model.**

| Parameter                                                                                                                   | Value                                       | Reference                               |
|-----------------------------------------------------------------------------------------------------------------------------|---------------------------------------------|-----------------------------------------|
| Smoking initiation probability,<br>monthly, by age and sex                                                                  | 0-0.0063                                    | Derived from NHIS<br>1997-2009 data     |
| Cessation probability, monthly,<br>by age and sex                                                                           | 0-0.035                                     | Derived from NHIS<br>1997-2009 data     |
| Relapse probability, monthly,<br>by time since cessation                                                                    | $P_{\text{Relapse}} = 0.62 * e^{-0.33 * t}$ | [5-8]                                   |
| Never Smoker mortality probability,<br>monthly, by age and sex, x 10 <sup>-4</sup>                                          | 0.4-95.2                                    | Derived from NHIS/NDI<br>1997-2009 data |
| Current Smoker or Recent Quitter<br>mortality probability, monthly, by<br>age and sex, x 10 <sup>-4</sup>                   | 0.4-136.1                                   | Derived from NHIS/NDI<br>1997-2009 data |
| Former Smoker mortality<br>probability, monthly, by age, sex,<br>and time since cessation <sup>a</sup> , x 10 <sup>-4</sup> | 0-111.5                                     | Derived from NHIS/NDI<br>1997-2009 data |
| Time to transition from Recent<br>Quitter to Former Smoker                                                                  | 5 years <sup>b</sup>                        | Assumption, [3,4]                       |

NHIS: National Health Interview Survey. NDI: National Death Index. STOP: Simulation of Tobacco and Nicotine Outcomes and Policy.

<sup>a</sup>These former smoker mortality probabilities were used only in the external validation exercises, comparing STOP model output to NHIS/NDI results. In cross-validation comparing STOP model output to

1  
2  
3 the CISNET model results, we applied multipliers to never smoker mortality rates to derive former  
4  
5 smoker mortality rates and then converted these to probabilities.  
6  
7

8  
9  
10 <sup>b</sup>This five-year abstinence period was based on data showing mortality risks by years since smoking  
11  
12 cessation.[3,4] We performed an analysis in which we assumed that mortality risks decreased to  
13  
14 “Former Smoker” levels immediately upon quitting smoking, but the model-generated results were not  
15  
16 a better fit to NHIS data (results not shown).  
17  
18  
19  
20  
21  
22  
23  
24  
25  
26  
27  
28  
29  
30  
31  
32  
33  
34  
35  
36  
37  
38  
39  
40  
41  
42  
43  
44  
45  
46  
47  
48  
49  
50  
51  
52  
53  
54  
55  
56  
57  
58  
59  
60

**Supplementary Table 2. Selected age- and sex-specific annual mortality rates: STOP model output versus NHIS-derived mortality.**

| <b>Women</b>            |                |          |               |          |              |          |
|-------------------------|----------------|----------|---------------|----------|--------------|----------|
|                         | Current Smoker |          | Former Smoker |          | Never Smoker |          |
| <b>Age group, years</b> | STOP           | NHIS/NDI | STOP          | NHIS/NDI | STOP         | NHIS/NDI |
| 40-44                   | 0.0023         | 0.0023   | 0.0017        | 0.0015   | 0.0012       | 0.0012   |
| 50-54                   | 0.0071         | 0.0071   | 0.0035        | 0.0029   | 0.0025       | 0.0025   |
| 60-64                   | 0.0147         | 0.0146   | 0.0087        | 0.0079   | 0.0051       | 0.0051   |
| <b>Men</b>              |                |          |               |          |              |          |
|                         | Current Smoker |          | Former Smoker |          | Never Smoker |          |
| <b>Age group, years</b> | STOP           | NHIS/NDI | STOP          | NHIS/NDI | STOP         | NHIS/NDI |
| 40-44                   | 0.0031         | 0.0034   | 0.0028        | 0.0025   | 0.0018       | 0.0018   |
| 50-54                   | 0.0094         | 0.0096   | 0.0059        | 0.0053   | 0.0042       | 0.0043   |
| 60-64                   | 0.0233         | 0.0232   | 0.0114        | 0.0099   | 0.0067       | 0.0066   |

STOP: Simulation of Tobacco and Nicotine Outcomes and Policy. NHIS: National Health Interview Survey.

NDI: National Death Index.

1 **Supplementary Figure 1. Smoking status by age group and sex in 1997: STOP model inputs for the external validation exercise of smoking**  
 2 **prevalence.**

3 **A**

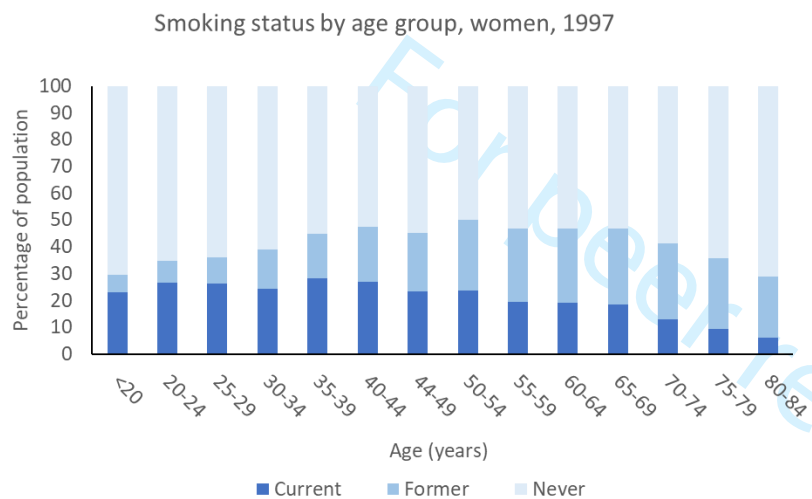

4 **B**

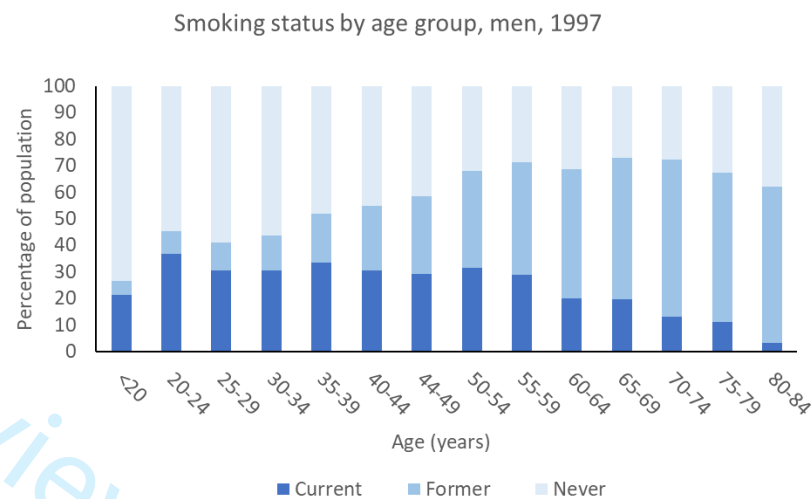

5  
 6 STOP: Simulation of Tobacco and Nicotine Outcomes and Policy. NHIS: National Health Interview Survey.

7 Panel A depicts women; Panel B depicts men. For each age group, the prevalence of current, former, and never smokers is entered as STOP  
 8 model input. The external validation analysis of smoking prevalence, using weighted NHIS 1997 survey respondent data as inputs, projects  
 9 smoking prevalence annually from 1998 to 2009.



10 **Supplementary Figure 2. External validation: STOP model results and NHIS results for prevalence of current, former, and never smokers each**  
11 **year from 1998 to 2009.**

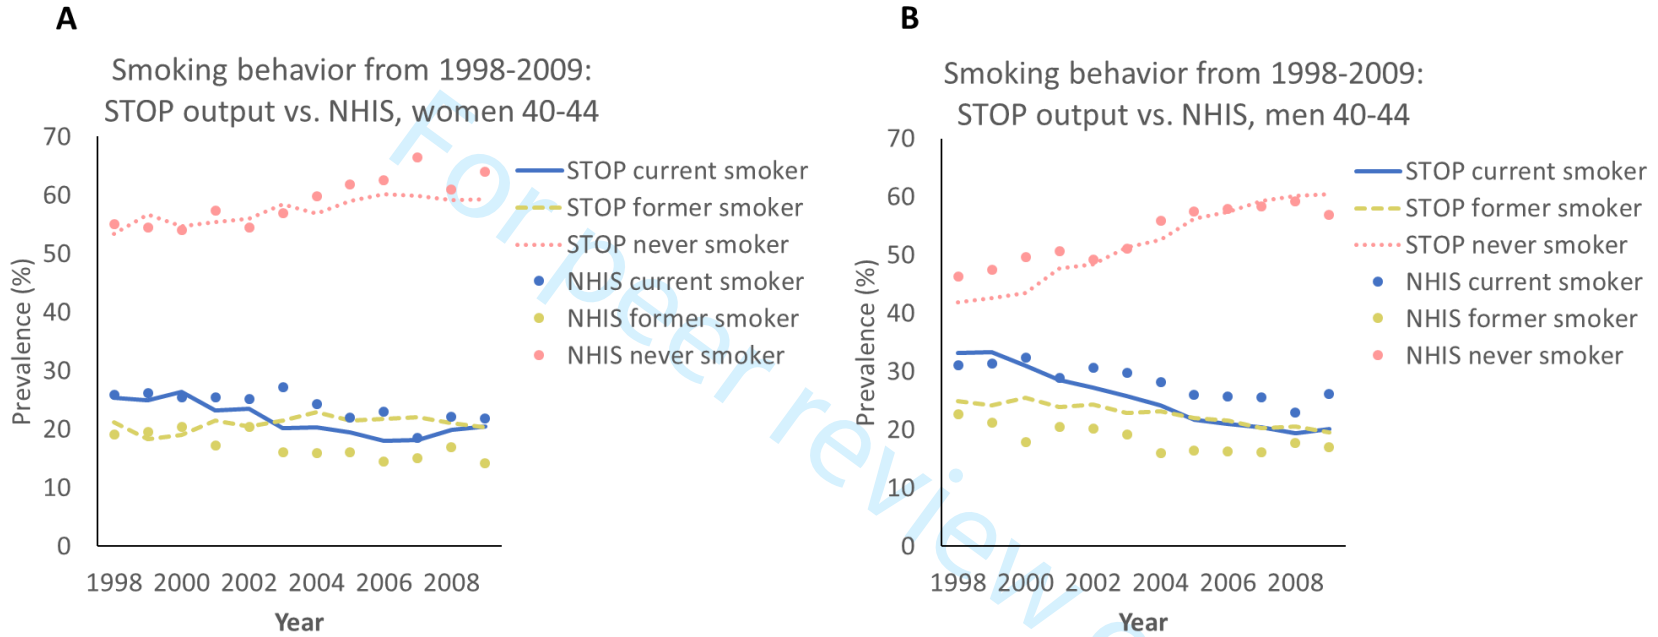

12  
13 STOP: Simulation of Tobacco and Nicotine Outcomes and Policy. NHIS: National Health Interview Survey. NDI: National Death Index.

14  
15 Panel A depicts women, Panel B depicts men. The STOP model cohort had the age and smoking status distribution of the 1997 NHIS survey  
16 respondents (Supplementary Figure 1). The STOP-generated results reflect a microsimulation that included probabilities of smoking initiation,  
17 smoking cessation, smoking relapse, and mortality.

18 **Supplementary Figure 3. Two-way sensitivity analysis of smoking initiation and smoking cessation multipliers for external validation exercise.**

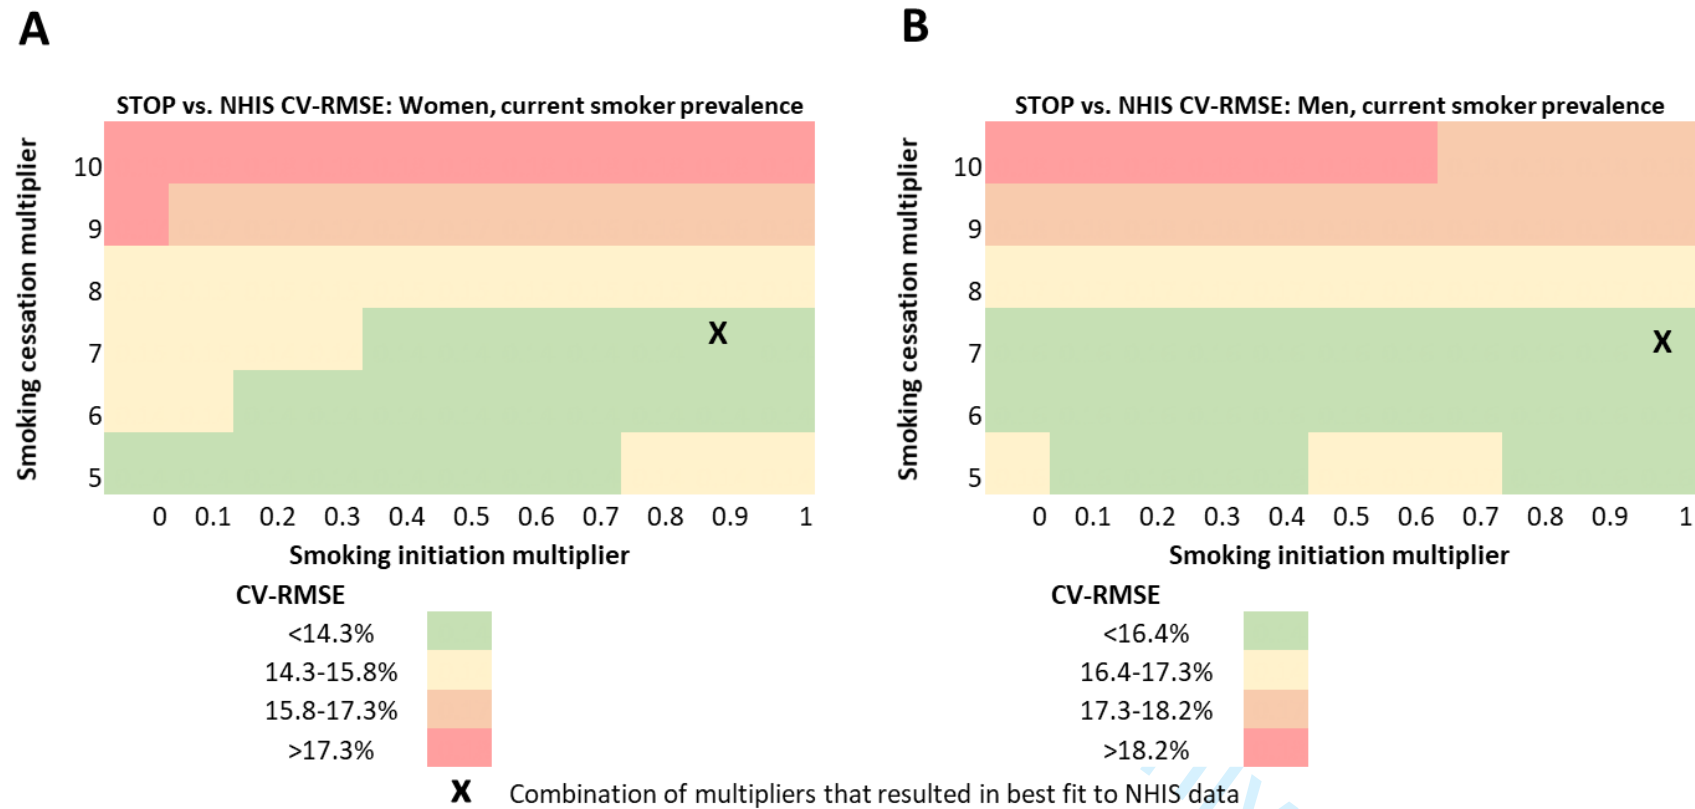

19

20 STOP: Simulation of Tobacco and Nicotine Outcomes and Policy. NHIS: National Health Interview Survey. CV-RMSE: coefficient of variation of

21 root-mean-square error.

22

1  
2  
3 23 Panel A depicts women; Panel B depicts men. The multipliers were applied to the original cessation and initiation rates derived from pooled  
4  
5 24 1997-2009 NHIS data and used in the STOP model. The horizontal axis shows the multiplier applied to smoking initiation rates (subsequently  
6  
7  
8 25 converted to probabilities) in the STOP model, and the vertical axis shows the multiplier applied to smoking cessation rates (subsequently  
9  
10 26 converted to probabilities). Colored cells represent the CV-RMSE of STOP model-generated versus NHIS-reported current smoking prevalence  
11  
12 27 among people ages 30-84 years from 1998 to 2009.  
13  
14  
15  
16  
17  
18  
19  
20  
21  
22  
23  
24  
25  
26  
27  
28  
29  
30  
31  
32  
33  
34  
35  
36  
37  
38  
39  
40  
41  
42  
43  
44  
45  
46  
47

For peer review only
